# Supplementary material for: Nascent RNA sequencing analysis provides insights into enhancer-mediated gene regulation
Source: BMC Genomics. 2018 Aug 23;19:633. doi: 10.1186/s12864-018-5016-z (PMC6107967; doi:10.1186/s12864-018-5016-z)
Supplement: Supplementary file 9 — Table S4. Transcriptional changes of active enhancers upon Hdac3 deletion. (XLSX 264 kb) [file 12864_2018_5016_MOESM9_ESM.xlsx]

## Sheet: Table-S4 changes in enhancers
Enhancer_ID	chr	start	end	baseMean	log2FoldChange	lfcSE	stat	pvalue	padj
657	chr13	52179111	52197356	457.158	-4.93211	0.299699	-16.4569	7.48145e-61	1.70727e-57
1881	chr6	97260990	97266564	759.714	-2.93954	0.246846	-11.9084	1.0703e-32	1.22121e-29
135	chr1	40162028	40164946	289.236	-3.40691	0.294647	-11.5627	6.37028e-31	4.84566e-28
1321	chr2	27620729	27627331	2469.37	-1.99167	0.175522	-11.3472	7.65963e-30	3.49586e-27
2046	chr8	126733435	126739082	1672.75	-2.06196	0.181436	-11.3647	6.26775e-30	3.49586e-27
848	chr15	77322788	77340374	1883.28	-2.0364	0.180933	-11.255	2.18726e-29	8.31887e-27
673	chr13	60468146	60482051	966.778	-2.14432	0.201232	-10.6559	1.63609e-26	5.33365e-24
1586	chr4	150779808	150791114	746.49	-2.00699	0.198655	-10.1029	5.36315e-24	1.52984e-21
1320	chr2	27592034	27601398	1384.21	-1.8086	0.184548	-9.80016	1.12412e-22	2.85028e-20
557	chr12	85461815	85463244	1805.1	1.77531	0.182597	9.72254	2.41673e-22	5.01361e-20
1739	chr5	87356786	87376694	543.78	-2.07699	0.213598	-9.72386	2.38568e-22	5.01361e-20
1334	chr2	31445103	31462584	7332.32	-1.6275	0.169795	-9.58509	9.23764e-22	1.75669e-19
928	chr16	4810951	4830393	731.415	-2.0626	0.215826	-9.55674	1.21521e-21	2.13317e-19
2036	chr8	124133657	124153342	1993.23	-1.69539	0.180925	-9.37069	7.2062e-21	1.17461e-18
2228	chr9	78020046	78023573	147.725	-2.9556	0.31737	-9.31279	1.24512e-20	1.89425e-18
146	chr1	60592429	60602746	385.028	-2.60868	0.287408	-9.07658	1.12041e-19	1.59799e-17
471	chr12	110213758	110222065	301.296	-2.44627	0.272916	-8.96348	3.14592e-19	4.22293e-17
2012	chr8	10933620	10938264	165.121	-2.82444	0.319286	-8.84612	9.06158e-19	1.14881e-16
656	chr13	52152249	52156899	166.49	-2.60022	0.296774	-8.76162	1.92459e-18	2.31154e-16
816	chr15	38383466	38386099	1735.4	1.63179	0.186747	8.73798	2.37317e-18	2.70779e-16
1853	chr6	72255401	72273614	1861.2	-1.57615	0.183489	-8.58992	8.70336e-18	9.45766e-16
1090	chr18	46643415	46646643	490.966	-2.02592	0.240068	-8.43895	3.20194e-17	3.32129e-15
1280	chr2	167826232	167869905	2742.1	-1.56248	0.186165	-8.39297	4.74018e-17	4.70308e-15
1478	chr3	52599683	52609977	613.133	-1.73218	0.207248	-8.35798	6.38023e-17	6.06654e-15
1572	chr4	136133311	136136550	433.21	1.80409	0.21644	8.33527	7.73202e-17	7.05778e-15
903	chr16	23191498	23207409	3678.74	-1.65689	0.199146	-8.31996	8.79897e-17	7.72279e-15
1093	chr18	5157682	5164557	896.999	1.56341	0.190471	8.20813	2.24667e-16	1.89885e-14
164	chr1	67108754	67118812	606.489	-1.82535	0.224622	-8.12634	4.42456e-16	3.60602e-14
2141	chr9	114977924	114979468	583.852	1.64168	0.202311	8.11467	4.87105e-16	3.83301e-14
1680	chr5	145620474	145636764	498.886	-2.21229	0.278489	-7.94391	1.95901e-15	1.49015e-13
762	chr14	60174889	60185517	133.587	-2.41036	0.304246	-7.92241	2.32949e-15	1.7148e-13
1323	chr2	30631386	30637752	2422.12	1.5926	0.201793	7.89228	2.96704e-15	2.11587e-13
710	chr14	100167914	100232251	3401.49	-1.49289	0.190851	-7.8223	5.18679e-15	3.58674e-13
321	chr10	95658199	95662644	168.932	2.15506	0.280368	7.68653	1.51178e-14	1.01467e-12
2227	chr9	78004653	78006328	95.9061	-2.74636	0.363381	-7.55781	4.09914e-14	2.67264e-12
518	chr12	52444735	52451467	490.868	-1.70248	0.226077	-7.53053	5.05332e-14	3.20325e-12
2198	chr9	46378472	46382701	420.909	1.60244	0.212978	7.524	5.31266e-14	3.27662e-12
1032	chr17	83527128	83528169	441.42	1.64666	0.219054	7.51715	5.59845e-14	3.36201e-12
130	chr1	37024960	37032348	217.746	-2.01311	0.267958	-7.51278	5.78869e-14	3.38713e-12
1709	chr5	43032516	43045141	361.341	-2.05009	0.273841	-7.48642	7.07767e-14	4.03781e-12
733	chr14	21822278	21824121	557.773	1.52992	0.205638	7.43989	1.00772e-13	5.60881e-12
796	chr15	102011684	102018981	381.9	1.7463	0.235786	7.40629	1.29885e-13	6.89297e-12
1396	chr3	10040246	10042524	96.6977	-2.63428	0.355587	-7.40827	1.27962e-13	6.89297e-12
2124	chr8	89271578	89287678	338.75	-1.80935	0.245403	-7.37295	1.66893e-13	8.65565e-12
1644	chr5	105975033	105976741	651.89	1.58592	0.216628	7.32095	2.46221e-13	1.24861e-11
470	chr12	110017647	110027885	1491.78	-1.55857	0.21331	-7.30659	2.73998e-13	1.35927e-11
224	chr10	19444579	19465505	306.515	-1.90887	0.261848	-7.29	3.09951e-13	1.50491e-11
1378	chr2	75606597	75614002	251.558	1.83508	0.251969	7.28294	3.26618e-13	1.5528e-11
660	chr13	54302301	54305129	797.415	1.44048	0.199886	7.20651	5.74043e-13	2.6734e-11
1922	chr7	141046540	141049075	1110.81	1.44196	0.20068	7.18536	6.70324e-13	3.05936e-11
1823	chr6	34597680	34616686	583.019	1.56019	0.21885	7.12905	1.01063e-12	4.52207e-11
289	chr10	77447630	77457996	715.225	1.41359	0.199376	7.09005	1.3406e-12	5.88319e-11
191	chr10	111102011	111103620	351.007	1.69885	0.239764	7.0855	1.38539e-12	5.96502e-11
420	chr11	63781464	63787562	109.84	2.28308	0.322849	7.07167	1.53084e-12	6.46921e-11
329	chr10	95835507	95844574	1382.24	-1.46667	0.208183	-7.0451	1.85328e-12	7.68944e-11
694	chr13	9056948	9065044	179.895	-2.07849	0.296839	-7.00211	2.52144e-12	1.02749e-10
80	chr1	172985940	172992125	201.109	-1.8205	0.261619	-6.95857	3.43741e-12	1.37617e-10
1044	chr17	85897147	85929373	2134.2	-1.28024	0.184084	-6.95463	3.535e-12	1.39084e-10
1561	chr4	133467150	133469454	480.854	1.46284	0.210866	6.93729	3.99696e-12	1.54594e-10
1712	chr5	51287116	51289070	39.1872	-3.53281	0.515043	-6.85925	6.92229e-12	2.63278e-10
483	chr12	16632431	16634786	83.0074	-2.59163	0.378588	-6.84553	7.61944e-12	2.85042e-10
1330	chr2	30706252	30709713	407.713	1.46045	0.214862	6.79714	1.06715e-11	3.92779e-10
1050	chr17	87529455	87532748	728.477	1.34796	0.198762	6.78179	1.18692e-11	4.29929e-10
1552	chr4	129794686	129796700	233.825	1.72679	0.254976	6.77234	1.26718e-11	4.44877e-10
1646	chr5	107075010	107076552	171.105	1.83342	0.270721	6.77238	1.26683e-11	4.44877e-10
449	chr11	86850028	86861670	598.646	-1.39487	0.20752	-6.72165	1.79677e-11	6.21247e-10
2055	chr8	128653588	128655921	467.005	1.41533	0.210653	6.71876	1.83277e-11	6.24235e-10
1582	chr4	150683459	150687282	342.097	-1.52247	0.227383	-6.69563	2.1475e-11	7.10231e-10
1559	chr4	133115985	133118983	426.422	1.52712	0.228042	6.69669	2.13186e-11	7.10231e-10
286	chr10	69410942	69418138	288.806	1.59895	0.239103	6.68728	2.27357e-11	7.41182e-10
79	chr1	172650571	172667793	652.539	-1.33132	0.199776	-6.66407	2.6634e-11	8.56039e-10
1479	chr3	52616784	52620116	120.876	-2.04594	0.307823	-6.64648	3.00185e-11	9.5142e-10
1951	chr7	37132300	37140700	144.586	1.86925	0.281412	6.64238	3.08655e-11	9.64863e-10
24	chr1	133492417	133494369	337.109	1.48073	0.223792	6.61653	3.67721e-11	1.13397e-09
1398	chr3	10142019	10147711	367.509	1.44045	0.218398	6.59555	4.23693e-11	1.27219e-09
1583	chr4	150704616	150709177	804.585	-1.30586	0.197973	-6.59614	4.22009e-11	1.27219e-09
619	chr13	37650414	37671473	693.236	-1.34176	0.20435	-6.56598	5.16903e-11	1.53191e-09
2097	chr8	47411019	47415262	332.761	1.46292	0.223475	6.54624	5.9003e-11	1.72622e-09
450	chr11	86865307	86873371	336.821	-1.48608	0.227203	-6.54074	6.12137e-11	1.76822e-09
1432	chr3	127017309	127026923	361.031	-1.53035	0.234652	-6.5218	6.94697e-11	1.98162e-09
1855	chr6	72288798	72291400	63.651	-2.57444	0.39753	-6.47608	9.41387e-11	2.65215e-09
163	chr1	67101774	67104343	228.288	-1.60371	0.248051	-6.46525	1.01133e-10	2.81445e-09
373	chr11	20531277	20533306	295.6	1.49792	0.232376	6.4461	1.14767e-10	3.15541e-09
284	chr10	69150572	69174676	1178.57	-1.23915	0.192515	-6.43665	1.22139e-10	3.31812e-09
1173	chr19	38357126	38373588	1254.01	-1.18646	0.184429	-6.43314	1.24994e-10	3.35239e-09
1616	chr4	57781505	57818111	1303.96	1.17886	0.183295	6.43151	1.26339e-10	3.35239e-09
519	chr12	52473624	52475398	127.622	-2.09422	0.327763	-6.38943	1.66507e-10	4.36746e-09
736	chr14	24747138	24749017	243.801	1.67782	0.262736	6.38594	1.70345e-10	4.41737e-09
1381	chr2	75792073	75796965	183.052	1.77207	0.277791	6.37915	1.78072e-10	4.56585e-09
975	chr17	26546787	26550502	380.912	1.42677	0.224265	6.36199	1.99157e-10	5.04974e-09
1698	chr5	16468874	16471394	187.68	1.64846	0.25954	6.35146	2.13279e-10	5.33853e-09
1894	chr7	109654376	109673339	603.229	1.31146	0.206528	6.35006	2.15226e-10	5.33853e-09
644	chr13	46018405	46021040	73.3594	-2.34241	0.371547	-6.3045	2.89134e-10	6.94531e-09
1480	chr3	52621933	52626534	113.015	-1.98211	0.314353	-6.30538	2.87491e-10	6.94531e-09
1614	chr4	55650129	55653233	2084.18	1.23877	0.196468	6.30518	2.87864e-10	6.94531e-09
634	chr13	43863360	43866310	419.163	1.35434	0.215056	6.29762	3.02252e-10	7.18478e-09
66	chr1	157442448	157446058	628.214	1.24877	0.199555	6.25779	3.9047e-10	9.18611e-09
1076	chr18	38541909	38544347	120.679	1.96795	0.314649	6.25444	3.98953e-10	9.2899e-09
767	chr14	63252063	63272941	1976.54	1.12944	0.180828	6.24593	4.21293e-10	9.71102e-09
1068	chr18	35941360	35943369	247.836	1.49215	0.239282	6.23595	4.49043e-10	1.02472e-08
1383	chr2	84183646	84185839	241.269	1.52487	0.24801	6.14843	7.82518e-10	1.76803e-08
1833	chr6	51171783	51174533	459.184	1.28662	0.210376	6.11579	9.60787e-10	2.14952e-08
1251	chr2	163594334	163598148	366.77	-1.34524	0.220207	-6.10898	1.00267e-09	2.22146e-08
1900	chr7	120829312	120832377	303.964	1.42579	0.233605	6.10343	1.03818e-09	2.27801e-08
1930	chr7	145109965	145113157	622.549	1.24963	0.204876	6.09945	1.06436e-09	2.31322e-08
824	chr15	59679511	59681906	270.659	1.42206	0.2337	6.08496	1.16517e-09	2.50842e-08
1875	chr6	90505071	90516292	268.69	-1.44104	0.238342	-6.0461	1.48393e-09	3.16479e-08
388	chr11	30228072	30269634	1959.47	1.07154	0.177804	6.02654	1.67505e-09	3.53932e-08
863	chr15	84653216	84655647	158.575	1.63112	0.270946	6.02008	1.74328e-09	3.64969e-08
711	chr14	100255582	100288678	2681.58	-1.21656	0.202368	-6.01164	1.83654e-09	3.80998e-08
1390	chr2	92741906	92743757	79.1827	2.10498	0.350303	6.00904	1.86623e-09	3.83669e-08
1814	chr6	28980156	28982478	165.172	1.63326	0.271944	6.00588	1.90298e-09	3.87733e-08
1815	chr6	29214841	29218744	885.091	1.18994	0.198194	6.00394	1.92587e-09	3.88924e-08
1496	chr3	83861723	83863857	285.55	1.40064	0.233861	5.9892	2.10877e-09	4.22124e-08
1836	chr6	51678902	51686675	1563.82	-1.22158	0.204428	-5.97557	2.29283e-09	4.54976e-08
977	chr17	27824510	27827418	1169	1.24769	0.209054	5.96825	2.39805e-09	4.71754e-08
154	chr1	60861972	60864784	167.88	1.59409	0.267327	5.96307	2.47549e-09	4.82826e-08
1101	chr18	5818381	5821063	260.008	1.41046	0.237792	5.9315	3.00178e-09	5.80513e-08
1065	chr18	35885801	35890813	324.084	1.35041	0.229371	5.88747	3.92157e-09	7.52019e-08
35	chr1	135661226	135700983	2420.92	1.06215	0.180723	5.87725	4.17134e-09	7.9325e-08
1837	chr6	51695469	51713249	2005.73	-1.09451	0.186666	-5.86346	4.53329e-09	8.54956e-08
1331	chr2	30710476	30718659	510.605	1.22279	0.209084	5.8483	4.96634e-09	9.2895e-08
651	chr13	51991691	51993316	31.1694	-3.04349	0.522498	-5.82488	5.71528e-09	1.0518e-07
1489	chr3	65658363	65660058	293.561	1.32749	0.227849	5.82618	5.67106e-09	1.0518e-07
1150	chr19	21941091	21944073	284.294	1.37153	0.236175	5.80726	6.35041e-09	1.15933e-07
405	chr11	53762496	53765204	1503.89	1.07805	0.185995	5.79613	6.78614e-09	1.22905e-07
589	chr13	112407617	112417556	204.289	1.46938	0.253621	5.7936	6.88949e-09	1.23794e-07
2199	chr9	46387860	46392549	139.703	1.65162	0.28534	5.78826	7.11191e-09	1.26792e-07
1669	chr5	134571252	134573194	356.887	1.33369	0.230771	5.7793	7.50127e-09	1.32697e-07
1286	chr2	169995539	169999314	139.538	1.70956	0.296537	5.76509	8.16121e-09	1.42167e-07
1380	chr2	75776108	75778805	242.471	1.44218	0.250103	5.76634	8.10104e-09	1.42167e-07
74	chr1	169915327	169918909	40.2826	2.60622	0.452802	5.75576	8.62508e-09	1.49109e-07
605	chr13	35013654	35024727	810.668	-1.32959	0.231075	-5.75391	8.72004e-09	1.49617e-07
1431	chr3	127004712	127007758	240.668	-1.41604	0.246178	-5.75209	8.81447e-09	1.50109e-07
613	chr13	37505714	37507580	295.426	1.49341	0.260343	5.73631	9.6761e-09	1.63562e-07
953	chr16	92018843	92023777	957.926	1.15729	0.201946	5.73071	1.00011e-08	1.67813e-07
1758	chr5	96910483	96914139	435.371	1.19421	0.209425	5.70235	1.18166e-08	1.96828e-07
2000	chr7	92695295	92696873	80.5113	1.94445	0.342134	5.6833	1.32119e-08	2.18476e-07
1952	chr7	37211012	37216104	201.026	-1.49764	0.264982	-5.65183	1.58747e-08	2.60619e-07
1211	chr2	116974872	116977317	345.884	1.2386	0.219489	5.6431	1.67012e-08	2.7223e-07
1271	chr2	167564055	167566707	132.448	-1.74991	0.310628	-5.63346	1.7663e-08	2.85865e-07
1326	chr2	30674017	30679814	366.876	1.22696	0.218271	5.62125	1.89583e-08	3.0357e-07
1820	chr6	31641869	31643452	102.604	1.76759	0.314481	5.62066	1.9023e-08	3.0357e-07
1677	chr5	142925754	142934660	832.817	1.11869	0.199113	5.61838	1.92758e-08	3.05468e-07
578	chr13	107675452	107677542	139.573	1.6289	0.290962	5.59834	2.16412e-08	3.40588e-07
1927	chr7	145030459	145031912	110.414	1.84676	0.330237	5.59224	2.24159e-08	3.50364e-07
2117	chr8	85220136	85222911	188.6	1.56021	0.279187	5.5884	2.29177e-08	3.54394e-07
1874	chr6	90434315	90437060	160.499	-1.538	0.275238	-5.58789	2.29844e-08	3.54394e-07
25	chr1	133927957	133955521	1695.77	-1.03402	0.18544	-5.57606	2.46031e-08	3.76808e-07
687	chr13	70277099	70286149	601.392	1.10274	0.198562	5.55366	2.79754e-08	4.25599e-07
1051	chr17	87612784	87614256	214.949	1.36914	0.246879	5.54578	2.92639e-08	4.42254e-07
1541	chr4	11865291	11871010	240.419	-1.46009	0.263424	-5.54272	2.97811e-08	4.47108e-07
1434	chr3	127497535	127499319	1157.53	1.02417	0.184956	5.53739	3.07008e-08	4.57904e-07
1475	chr3	52404302	52405871	98.7823	1.75273	0.317947	5.51265	3.53475e-08	5.23786e-07
332	chr10	96227704	96232729	311.11	-1.28668	0.234066	-5.4971	3.86082e-08	5.68412e-07
1315	chr2	26570372	26572990	415.59	1.20153	0.218851	5.49016	4.01576e-08	5.87433e-07
850	chr15	77353550	77360536	182.952	1.43482	0.262457	5.46689	4.57999e-08	6.57329e-07
1182	chr19	44266409	44268261	166.912	1.45917	0.266891	5.46727	4.57007e-08	6.57329e-07
530	chr12	69501036	69503681	755.578	1.0568	0.193285	5.46756	4.56264e-08	6.57329e-07
734	chr14	21992187	22000732	696.274	1.06489	0.194852	5.46511	4.6262e-08	6.59812e-07
2115	chr8	83772117	83774048	269.998	1.28038	0.234582	5.45814	4.81151e-08	6.8198e-07
740	chr14	25350270	25384977	1393.56	0.990529	0.181843	5.44716	5.11802e-08	7.20946e-07
778	chr14	73121118	73125289	257.378	1.28581	0.236456	5.43786	5.39243e-08	7.5494e-07
1542	chr4	119732447	119748137	826.669	1.04353	0.191943	5.43667	5.42862e-08	7.55372e-07
396	chr11	3572170	3574299	83.8482	1.82991	0.337315	5.42494	5.79749e-08	8.01811e-07
1882	chr6	98402036	98403770	140.175	-1.62115	0.299581	-5.41139	6.25386e-08	8.59718e-07
1817	chr6	29657266	29680066	1077.8	-1.00386	0.18572	-5.40523	6.47269e-08	8.84471e-07
920	chr16	34572415	34575081	214.805	1.35112	0.250869	5.38575	7.21439e-08	9.79955e-07
1327	chr2	30681429	30687984	342.41	1.1928	0.221772	5.37848	7.51172e-08	1.01004e-06
676	chr13	60496932	60500809	305.779	-1.21767	0.226453	-5.37712	7.56863e-08	1.01004e-06
2118	chr8	85380586	85381831	82.3892	1.86682	0.34712	5.37802	7.53089e-08	1.01004e-06
2243	chr9	96738365	96753481	276.175	1.31257	0.244356	5.37152	7.80744e-08	1.03585e-06
955	chr16	92156658	92160753	134.026	-1.6145	0.301246	-5.35942	8.34911e-08	1.10131e-06
2068	chr8	34441454	34464614	908.606	-1.02888	0.192425	-5.34692	8.94637e-08	1.17331e-06
1306	chr2	181477329	181484764	286.335	1.23662	0.231426	5.34347	9.11861e-08	1.18907e-06
1325	chr2	30656736	30659965	702.75	1.08593	0.203877	5.32641	1.00172e-07	1.29882e-06
2134	chr9	102709005	102711130	114.676	1.58999	0.298608	5.32467	1.01136e-07	1.30391e-06
2270	chrX	38472982	38474770	219.511	1.37926	0.259126	5.32274	1.02217e-07	1.30979e-06
2034	chr8	123704461	123706557	71.1646	2.0131	0.378416	5.31979	1.03888e-07	1.30979e-06
1747	chr5	90446209	90452238	856.841	-1.10103	0.206941	-5.32048	1.03491e-07	1.30979e-06
1138	chr19	12532593	12540714	155.603	1.47779	0.277715	5.32124	1.03061e-07	1.30979e-06
1826	chr6	37731706	37733372	68.0338	1.94126	0.365197	5.31566	1.06274e-07	1.33251e-06
992	chr17	43356613	43361578	1577.96	1.16722	0.219917	5.30756	1.11104e-07	1.37793e-06
773	chr14	68049984	68052524	152.78	1.46931	0.27681	5.308	1.10836e-07	1.37793e-06
1363	chr2	61138321	61140274	98.858	1.6771	0.316186	5.30415	1.13197e-07	1.3963e-06
134	chr1	40155053	40158701	52.4124	-2.20862	0.416831	-5.2986	1.16696e-07	1.42406e-06
1856	chr6	72292370	72294878	94.5857	-1.7375	0.327886	-5.2991	1.16376e-07	1.42406e-06
1787	chr6	136463059	136475355	445.963	1.12077	0.211855	5.29028	1.22129e-07	1.48244e-06
1246	chr2	160451082	160452865	126.422	1.51994	0.288031	5.27702	1.31301e-07	1.58534e-06
1460	chr3	32667886	32670527	174.085	1.40083	0.265634	5.27352	1.33832e-07	1.6074e-06
2096	chr8	47372773	47388955	523.525	1.07155	0.203715	5.26004	1.44023e-07	1.72073e-06
142	chr1	51497943	51509392	240.749	1.29403	0.246362	5.25254	1.50017e-07	1.78301e-06
1566	chr4	133928011	133929785	221.069	1.27669	0.243513	5.24279	1.5817e-07	1.87018e-06
612	chr13	37473224	37492906	773.976	1.07237	0.204913	5.23327	1.66535e-07	1.95893e-06
2020	chr8	115535388	115541867	324.832	1.18306	0.226112	5.23218	1.67526e-07	1.96049e-06
1867	chr6	87423223	87425331	126.962	1.58111	0.302336	5.22965	1.69835e-07	1.97736e-06
2189	chr9	42270341	42281048	438.394	1.45013	0.277356	5.22841	1.70975e-07	1.98053e-06
1467	chr3	41408323	41410227	42.2512	-2.30748	0.44546	-5.17999	2.219e-07	2.55746e-06
878	chr15	96741415	96744310	214.568	-1.39843	0.270335	-5.17294	2.30436e-07	2.64249e-06
1903	chr7	122819858	122822486	321.338	1.17233	0.226717	5.17088	2.32996e-07	2.65848e-06
922	chr16	38724109	38726050	398.989	1.13307	0.219357	5.16545	2.39866e-07	2.72325e-06
1539	chr4	117786533	117795315	398.028	-1.22119	0.236721	-5.15878	2.48564e-07	2.7942e-06
1010	chr17	63848900	63850293	297.261	1.26337	0.244882	5.15908	2.48167e-07	2.7942e-06
2242	chr9	96436783	96439085	710.628	1.02428	0.198662	5.15589	2.52432e-07	2.81653e-06
386	chr11	23210752	23211850	100.942	1.60641	0.311595	5.15545	2.53019e-07	2.81653e-06
235	chr10	21668628	21670890	281.13	1.28171	0.248674	5.15419	2.54735e-07	2.82187e-06
971	chr17	22313679	22315525	1107.5	0.984187	0.191124	5.14948	2.61212e-07	2.87964e-06
1217	chr2	12022876	12024951	308.666	1.18638	0.230608	5.14456	2.68149e-07	2.92783e-06
1391	chr2	92750597	92770763	378.864	1.1373	0.221047	5.14506	2.67437e-07	2.92783e-06
606	chr13	36576430	36585641	832.15	-1.0655	0.207702	-5.12995	2.89821e-07	3.14939e-06
468	chr12	103818922	103824849	1030.92	-0.95415	0.186042	-5.12869	2.91773e-07	3.15557e-06
454	chr11	93986622	93990225	307.436	1.1789	0.22997	5.12633	2.95448e-07	3.18025e-06
1886	chr7	101084517	101086854	40.0178	-2.45778	0.479775	-5.12279	3.01053e-07	3.22537e-06
1795	chr6	142731942	142734515	30.4105	2.51479	0.491654	5.11495	3.13816e-07	3.34639e-06
1183	chr19	44282023	44285598	314.938	1.16377	0.228183	5.10018	3.39333e-07	3.60166e-06
573	chr13	102657691	102659074	90.3746	1.67196	0.329009	5.08179	3.73887e-07	3.93274e-06
1969	chr7	67848934	67849896	60.3279	1.94458	0.38266	5.08175	3.73972e-07	3.93274e-06
724	chr14	114947978	114949689	230.351	1.24551	0.245171	5.08016	3.77125e-07	3.9477e-06
127	chr1	31093271	31096824	1942.72	-0.999097	0.197267	-5.0647	4.09045e-07	4.26228e-06
2013	chr8	10964673	10966956	37.2173	-2.43153	0.481288	-5.05214	4.36896e-07	4.5318e-06
1289	chr2	170183930	170185885	419.037	1.09368	0.216761	5.04556	4.52197e-07	4.66929e-06
1123	chr18	82811471	82813432	139.692	1.46912	0.291309	5.04316	4.57913e-07	4.70701e-06
601	chr13	31178160	31181449	228.259	-1.29418	0.256721	-5.04119	4.62635e-07	4.73423e-06
1095	chr18	5426784	5429489	340.262	1.17584	0.234051	5.02388	5.06383e-07	5.15878e-06
1155	chr19	23060301	23073417	377.429	-1.43969	0.286823	-5.01944	5.18212e-07	5.25582e-06
808	chr15	36453466	36457085	126.117	1.44503	0.287935	5.01859	5.20518e-07	5.25585e-06
2171	chr9	32564236	32566386	168.607	1.35192	0.269554	5.0154	5.2922e-07	5.32017e-06
316	chr10	93374627	93377434	199.802	1.27283	0.253852	5.01407	5.32901e-07	5.33369e-06
1048	chr17	87457945	87475788	1855.86	0.966546	0.192975	5.00866	5.4811e-07	5.46195e-06
1873	chr6	88151473	88153273	79.541	1.69636	0.339071	5.00296	5.64579e-07	5.60161e-06
1187	chr19	53507058	53508833	122.25	1.46645	0.293725	4.99258	5.95795e-07	5.88573e-06
1830	chr6	4488292	4489697	105.538	1.56919	0.314585	4.98811	6.09729e-07	5.99743e-06
1629	chr4	86688579	86692014	129.196	1.58726	0.318872	4.97772	6.43371e-07	6.30117e-06
1540	chr4	11852657	11855134	72.6632	-1.76488	0.354999	-4.97151	6.64342e-07	6.47876e-06
356	chr11	110379194	110380773	106.318	-1.59397	0.322009	-4.95007	7.41866e-07	7.20399e-06
2188	chr9	41890016	41891770	108.122	1.5156	0.306844	4.93931	7.83984e-07	7.54874e-06
1590	chr4	155232699	155237091	260.428	1.17981	0.23884	4.93976	7.82202e-07	7.54874e-06
1470	chr3	51200162	51203819	146.021	-1.55388	0.31474	-4.93704	7.93185e-07	7.59894e-06
348	chr11	102371949	102377496	454.522	-1.04316	0.21132	-4.93638	7.95857e-07	7.59894e-06
1292	chr2	170218299	170221660	345.404	1.16902	0.23771	4.91782	8.75153e-07	8.32125e-06
941	chr16	87245237	87248184	88.7275	1.64514	0.334727	4.91487	8.88409e-07	8.41224e-06
107	chr1	190039567	190045824	240.489	-1.18986	0.242339	-4.9099	9.11226e-07	8.55727e-06
583	chr13	111817295	111823142	97.0754	1.7267	0.35166	4.91013	9.10163e-07	8.55727e-06
435	chr11	79280095	79282736	82.5386	-1.67619	0.342152	-4.89895	9.63496e-07	9.01106e-06
680	chr13	62906512	62909814	132.917	-1.43432	0.293331	-4.88977	1.00956e-06	9.40337e-06
2255	chrX	13344421	13348607	187.538	1.26527	0.258947	4.88621	1.02795e-06	9.50789e-06
1121	chr18	80483313	80484353	213.667	1.20725	0.247084	4.88599	1.02912e-06	9.50789e-06
1089	chr18	46634404	46639104	208.782	-1.34243	0.275345	-4.87546	1.08553e-06	9.98859e-06
1088	chr18	46408580	46410396	25.7912	-2.59935	0.533338	-4.87374	1.09506e-06	1.00358e-05
1665	chr5	123190833	123206574	785.065	-0.970049	0.199096	-4.87226	1.10327e-06	1.00707e-05
1096	chr18	5439954	5442601	130.978	1.46311	0.30078	4.86438	1.14817e-06	1.04388e-05
581	chr13	108448623	108450459	56.1313	-1.93463	0.39819	-4.85856	1.18242e-06	1.07074e-05
669	chr13	58446001	58453648	386.048	1.07984	0.222591	4.85121	1.22709e-06	1.10681e-05
1682	chr5	146064137	146070013	138.188	1.4916	0.307594	4.84925	1.23928e-06	1.1134e-05
591	chr13	112437759	112441185	193.147	1.2361	0.255062	4.84629	1.25794e-06	1.12573e-05
1872	chr6	88074104	88076447	440.883	1.00695	0.208557	4.82818	1.37787e-06	1.22825e-05
659	chr13	52940008	52942114	54.6739	-1.93235	0.400881	-4.82025	1.43376e-06	1.27309e-05
1949	chr7	37010472	37012182	173.092	1.25365	0.261596	4.7923	1.64883e-06	1.45838e-05
2048	chr8	126773390	126776119	182.596	-1.26496	0.264158	-4.78866	1.67899e-06	1.47933e-05
1262	chr2	165981455	165984092	826.128	1.04039	0.217325	4.78724	1.69087e-06	1.48406e-05
114	chr1	191469390	191471525	119.087	1.48535	0.310935	4.77706	1.77881e-06	1.55526e-05
2146	chr9	121293576	121315488	3370.98	0.856756	0.179534	4.7721	1.82313e-06	1.58793e-05
1218	chr2	12032497	12035074	220.513	1.20867	0.254902	4.7417	2.11937e-06	1.83894e-05
110	chr1	191223873	191251179	1511.46	0.879257	0.185548	4.73871	2.1508e-06	1.85913e-05
709	chr13	99844425	99852798	184.202	1.28199	0.270918	4.73202	2.22298e-06	1.91428e-05
1519	chr4	105259803	105264071	161.064	1.26038	0.26647	4.72992	2.24605e-06	1.92688e-05
1386	chr2	85094986	85099679	203.689	1.21388	0.257446	4.71508	2.41611e-06	2.06501e-05
677	chr13	60573134	60575083	47.3088	-1.95423	0.414768	-4.71162	2.4575e-06	2.09255e-05
1247	chr2	160618842	160620353	1102.35	0.88898	0.188732	4.71029	2.47368e-06	2.09849e-05
1809	chr6	17197404	17200042	143.705	1.35852	0.288501	4.7089	2.49054e-06	2.10496e-05
2109	chr8	72294561	72297470	437.045	0.982879	0.209093	4.70069	2.59283e-06	2.18333e-05
1112	chr18	68496920	68499996	94.2015	1.55617	0.331851	4.68935	2.74078e-06	2.29944e-05
1818	chr6	30026514	30027173	125.634	1.37765	0.29388	4.68781	2.76145e-06	2.30829e-05
1425	chr3	121889953	121892060	163.808	1.24197	0.265194	4.68324	2.82372e-06	2.35172e-05
469	chr12	108759643	108767638	1246.49	0.850109	0.182121	4.66784	3.04382e-06	2.52582e-05
817	chr15	38456532	38459318	82.592	1.5462	0.332201	4.65442	3.24896e-06	2.68628e-05
472	chr12	110229037	110233581	186.532	-1.34625	0.289774	-4.64585	3.38676e-06	2.78749e-05
166	chr1	71723132	71725675	130.916	-1.42012	0.305711	-4.6453	3.3958e-06	2.78749e-05
1445	chr3	149326001	149328270	194.676	1.25739	0.271353	4.63377	3.59064e-06	2.93686e-05
700	chr13	96981324	96985647	1737.19	-0.977309	0.210989	-4.63204	3.62079e-06	2.95095e-05
2145	chr9	120772545	120779603	355.053	1.01522	0.219286	4.62965	3.66278e-06	2.97454e-05
1769	chr6	117291831	117299009	159.162	-1.35228	0.292341	-4.62568	3.73365e-06	3.02134e-05
797	chr15	102376408	102379068	279.573	1.06066	0.229499	4.62164	3.80715e-06	3.06994e-05
635	chr13	43905837	43911485	242.775	1.11412	0.241145	4.6201	3.83551e-06	3.0711e-05
541	chr12	7862220	7921398	3568.89	-0.816965	0.176827	-4.62012	3.83511e-06	3.0711e-05
157	chr1	63429480	63432311	182.63	1.20102	0.260537	4.6098	4.0306e-06	3.21602e-05
1621	chr4	6356301	6358331	194.098	1.15633	0.251131	4.60447	4.13508e-06	3.28789e-05
1466	chr3	39219717	39221063	88.1305	1.52315	0.330867	4.60351	4.1543e-06	3.29171e-05
109	chr1	190058686	190070025	342.567	-1.02146	0.22193	-4.60263	4.17195e-06	3.29425e-05
1328	chr2	30688870	30694888	538.063	0.965622	0.209844	4.60163	4.19207e-06	3.29873e-05
1244	chr2	160210312	160211772	262.406	1.15834	0.251975	4.59703	4.28551e-06	3.36067e-05
2152	chr9	122083426	122087381	489.396	0.948994	0.206541	4.59471	4.3336e-06	3.38674e-05
1091	chr18	46647727	46652132	163.788	-1.39142	0.302979	-4.59246	4.38059e-06	3.41178e-05
482	chr12	16007941	16010335	82.9266	1.62652	0.354345	4.59022	4.42785e-06	3.4187e-05
670	chr13	58477449	58480313	151.264	1.2659	0.275802	4.58991	4.43443e-06	3.4187e-05
905	chr16	24056255	24058687	128.218	-1.45866	0.317724	-4.59096	4.41211e-06	3.4187e-05
1622	chr4	71291094	71292295	76.5778	1.55717	0.33932	4.5891	4.45168e-06	3.42045e-05
1028	chr17	83271628	83279434	958.653	0.972804	0.212356	4.58101	4.62727e-06	3.52088e-05
1294	chr2	170286404	170290192	111.488	1.37134	0.299354	4.58099	4.62777e-06	3.52088e-05
2027	chr8	12040910	12042569	119.139	1.3352	0.291467	4.58095	4.62867e-06	3.52088e-05
893	chr16	18732468	18733887	153.081	1.2641	0.276386	4.5737	4.79189e-06	3.61582e-05
336	chr10	96686236	96689013	37.5831	-2.13333	0.466406	-4.57398	4.78556e-06	3.61582e-05
2112	chr8	80895110	80896527	45.1628	1.90833	0.417339	4.57261	4.81687e-06	3.61582e-05
849	chr15	77342262	77345464	202.052	1.17833	0.257678	4.5729	4.81023e-06	3.61582e-05
2031	chr8	122710777	122725364	754.444	0.887333	0.194216	4.56879	4.9054e-06	3.6702e-05
2282	chrX	99294396	99295622	50.0162	1.85567	0.407008	4.5593	5.1324e-06	3.8275e-05
81	chr1	173793179	173801734	371.364	1.10422	0.242341	4.55648	5.20183e-06	3.86664e-05
1662	chr5	122144789	122147008	178.143	1.19905	0.264017	4.54154	5.58447e-06	4.13759e-05
1691	chr5	149067525	149068625	119.911	1.36866	0.301434	4.54051	5.61192e-06	4.14447e-05
1344	chr2	36216068	36219541	266.76	1.05371	0.232305	4.5359	5.73583e-06	4.22231e-05
2148	chr9	122020185	122024644	319.324	1.05707	0.233222	4.53246	5.82995e-06	4.2778e-05
1762	chr5	98165637	98169574	71.8543	1.58631	0.350523	4.52555	6.0239e-06	4.40594e-05
1094	chr18	5389701	5392800	199.335	1.13014	0.249814	4.52394	6.06994e-06	4.42543e-05
1793	chr6	142710384	142713602	43.3059	1.96878	0.435261	4.5232	6.09108e-06	4.4267e-05
1263	chr2	165986489	165987711	150.226	1.40353	0.310349	4.52242	6.11374e-06	4.42906e-05
2123	chr8	88868528	88870685	78.5284	-1.5544	0.344507	-4.51194	6.42364e-06	4.63884e-05
1933	chr7	19332408	19333837	66.1918	1.61818	0.35914	4.50571	6.61512e-06	4.76205e-05
579	chr13	107902759	107905296	237.624	1.08441	0.240852	4.5024	6.71915e-06	4.82173e-05
867	chr15	85640475	85669171	1964.47	0.795217	0.176732	4.49956	6.80933e-06	4.86382e-05
1305	chr2	181467861	181472697	95.8804	1.45186	0.322691	4.49922	6.82044e-06	4.86382e-05
61	chr1	155063141	155065902	137.687	1.25087	0.278367	4.4936	7.00307e-06	4.9785e-05
1104	chr18	5988234	5990669	385.208	0.993215	0.22143	4.48545	7.27595e-06	5.15644e-05
852	chr15	77881966	77886411	71.2758	1.55725	0.348333	4.47059	7.80056e-06	5.51111e-05
1237	chr2	148170522	148172524	49.1815	1.80263	0.403307	4.46961	7.8363e-06	5.51927e-05
1913	chr7	12960635	12963417	305.654	1.01175	0.226487	4.46714	7.9271e-06	5.54897e-05
1498	chr3	84314100	84315981	75.2741	1.55764	0.348666	4.46744	7.91601e-06	5.54897e-05
1040	chr17	84139955	84143196	246.387	1.05413	0.236191	4.46302	8.08114e-06	5.6395e-05
1981	chr7	71704366	71706617	66.9028	1.61513	0.361981	4.46193	8.12229e-06	5.65093e-05
1714	chr5	52475709	52478146	176.77	1.14821	0.257672	4.45611	8.34606e-06	5.78185e-05
176	chr1	75343765	75346369	45.8873	1.83882	0.412687	4.45572	8.36114e-06	5.78185e-05
1366	chr2	67565172	67567556	98.6879	1.39754	0.313892	4.45231	8.49529e-06	5.85687e-05
1168	chr19	36788040	36798300	609.208	-0.940538	0.212145	-4.43347	9.27286e-06	6.37369e-05
75	chr1	170109761	170111154	39.3697	2.02557	0.457122	4.43114	9.37355e-06	6.42356e-05
1351	chr2	45235748	45237206	154.424	1.20768	0.272876	4.42576	9.61015e-06	6.54638e-05
769	chr14	63341704	63345412	184.816	1.15812	0.261676	4.42577	9.60991e-06	6.54638e-05
1980	chr7	71409083	71410741	89.2652	1.42509	0.322335	4.42116	9.81744e-06	6.66609e-05
1668	chr5	124960188	124961452	106.58	1.33908	0.30292	4.42057	9.84431e-06	6.66609e-05
1317	chr2	27559153	27562835	390.895	-0.949443	0.214951	-4.41703	1.00067e-05	6.75601e-05
296	chr10	8084939	8090483	352.831	-1.33829	0.303173	-4.4143	1.01339e-05	6.82172e-05
160	chr1	64300480	64302463	149.861	1.22447	0.277521	4.41216	1.02344e-05	6.8691e-05
1215	chr2	118975761	118977271	192.212	1.11396	0.252844	4.40573	1.05429e-05	7.0554e-05
125	chr1	31017972	31021078	312.766	-1.07889	0.245134	-4.40122	1.07646e-05	7.1827e-05
911	chr16	24274569	24297349	1383.01	-1.03407	0.235098	-4.39846	1.09021e-05	7.25323e-05
1311	chr2	25162013	25165018	89.5312	1.49859	0.341187	4.39228	1.12171e-05	7.39807e-05
815	chr15	38373084	38375357	82.3389	1.45383	0.330912	4.39341	1.11584e-05	7.39807e-05
1526	chr4	106804280	106805842	108.17	1.32722	0.302171	4.39228	1.12167e-05	7.39807e-05
652	chr13	52023747	52026562	48.3409	-1.79973	0.409845	-4.39124	1.12706e-05	7.41196e-05
131	chr1	37040350	37042307	29.6812	-2.18859	0.499391	-4.38252	1.17317e-05	7.69301e-05
2176	chr9	32899573	32902436	172.093	1.164	0.265665	4.38146	1.17888e-05	7.70833e-05
938	chr16	86816400	86818032	113.588	-1.33757	0.305471	-4.37873	1.19373e-05	7.78312e-05
232	chr10	21440222	21445963	114.282	-1.30414	0.298114	-4.37464	1.21631e-05	7.90772e-05
207	chr10	121314557	121317385	100.72	1.34654	0.307887	4.37348	1.22279e-05	7.92731e-05
1348	chr2	38497068	38499374	24.1702	2.25223	0.515776	4.36667	1.26153e-05	8.1553e-05
308	chr10	87011199	87013632	111.571	1.29652	0.297303	4.36094	1.29503e-05	8.34818e-05
1184	chr19	44898913	44901180	167.361	1.15163	0.264197	4.35899	1.30666e-05	8.39941e-05
1086	chr18	4514134	4515420	76.3039	1.47553	0.338581	4.35799	1.31263e-05	8.41411e-05
2159	chr9	13466209	13541931	1663.8	0.819855	0.188318	4.35357	1.33935e-05	8.53744e-05
297	chr10	80921472	80923571	96.0853	1.37581	0.316007	4.35372	1.33844e-05	8.53744e-05
832	chr15	62741815	62745065	74.3254	-1.54801	0.35684	-4.33812	1.43707e-05	9.13479e-05
179	chr1	86486249	86488952	3142.29	0.756429	0.174602	4.33231	1.47553e-05	9.35321e-05
1312	chr2	25166708	25169715	161.024	1.17593	0.271706	4.32795	1.50506e-05	9.51397e-05
408	chr11	57961298	57964251	502.732	0.884892	0.204564	4.32575	1.52017e-05	9.58294e-05
2192	chr9	44473466	44481557	960.464	0.813836	0.188357	4.32071	1.55528e-05	9.77726e-05
1485	chr3	60166864	60170650	266.911	-1.14182	0.26435	-4.31934	1.565e-05	9.81133e-05
1569	chr4	135286324	135289809	123.551	1.23921	0.287079	4.31662	1.58436e-05	9.90549e-05
306	chr10	85044314	85045562	56.9019	-1.66233	0.385282	-4.31459	1.59901e-05	9.96978e-05
959	chr16	94557679	94560438	275.019	0.989862	0.229531	4.31254	1.61387e-05	0.00010035
15	chr1	119507409	119509815	82.6646	1.4472	0.335954	4.30775	1.64923e-05	0.000101993
2035	chr8	123709792	123711183	99.6649	1.38698	0.321946	4.3081	1.64666e-05	0.000101993
945	chr16	90623649	90624873	37.3337	1.90305	0.442132	4.30426	1.67546e-05	0.000103335
564	chr12	86823157	86825049	191.623	1.14766	0.2668	4.30157	1.69589e-05	0.000104313
998	chr17	47045409	47047279	57.2172	1.61735	0.376266	4.29841	1.72024e-05	0.000105527
22	chr1	133448170	133449352	42.065	1.81922	0.423879	4.29183	1.77207e-05	0.000108414
33	chr1	13466289	13468236	39.3762	-1.89794	0.443037	-4.28392	1.83625e-05	0.000111316
1585	chr4	150744154	150746992	119.565	-1.27823	0.298283	-4.2853	1.82494e-05	0.000111316
1819	chr6	30336611	30337620	75.1811	1.46423	0.341804	4.28384	1.83698e-05	0.000111316
1613	chr4	55604410	55605573	30.8873	2.03098	0.47413	4.28359	1.839e-05	0.000111316
735	chr14	22014203	22016398	116.812	1.24998	0.292213	4.27763	1.88897e-05	0.000113737
1137	chr19	12512474	12518507	160.268	1.13868	0.266188	4.27772	1.88813e-05	0.000113737
1687	chr5	147758070	147759187	54.0258	1.66085	0.38905	4.26898	1.96369e-05	0.000117925
327	chr10	95777590	95782834	1190.64	-0.823132	0.19319	-4.26073	2.03757e-05	0.000122041
415	chr11	61407443	61413021	926.777	0.848243	0.199149	4.25935	2.05027e-05	0.000122479
1473	chr3	52197038	52200124	128.991	1.20805	0.283798	4.25674	2.07428e-05	0.000122948
1802	chr6	145339463	145342192	1341.98	0.808328	0.189854	4.25762	2.06616e-05	0.000122948
1792	chr6	142537444	142539709	79.3505	1.48692	0.349288	4.25701	2.07179e-05	0.000122948
1036	chr17	84056074	84058567	193.392	1.1004	0.258606	4.25514	2.08918e-05	0.000123511
285	chr10	69185059	69196895	526.147	-0.92209	0.216823	-4.25273	2.11184e-05	0.000124487
761	chr14	58812078	58813654	71.6745	1.4806	0.348194	4.25222	2.11661e-05	0.000124487
422	chr11	67455443	67469396	259.183	1.06808	0.251303	4.25019	2.13594e-05	0.000125301
1655	chr5	114557717	114559456	126.236	-1.39393	0.328383	-4.24484	2.18753e-05	0.000127999
1734	chr5	75403143	75405213	83.1668	1.40479	0.331714	4.23494	2.28609e-05	0.000133423
944	chr16	90196742	90199838	182.723	1.08163	0.255614	4.23151	2.32127e-05	0.00013506
219	chr10	127948651	127952377	153.675	-1.15533	0.27306	-4.23106	2.32597e-05	0.00013506
638	chr13	44058892	44063483	136.187	1.19105	0.282204	4.22053	2.43734e-05	0.000141168
741	chr14	25399741	25428553	1736.76	0.7679	0.182252	4.2134	2.51555e-05	0.000145329
82	chr1	177256425	177259901	459.312	0.8758	0.208416	4.20218	2.64359e-05	0.00015234
2026	chr8	120357374	120368017	211.832	1.04001	0.247647	4.19957	2.67424e-05	0.000153718
603	chr13	34461333	34466618	400.771	-0.957529	0.228075	-4.1983	2.68924e-05	0.000154192
223	chr10	19061559	19063601	127.994	1.21078	0.28857	4.19578	2.71929e-05	0.000155135
1553	chr4	129876764	129878501	225.035	1.06043	0.252712	4.19618	2.71454e-05	0.000155135
245	chr10	3701567	3703335	39.597	1.83707	0.439268	4.18211	2.88813e-05	0.000164034
1866	chr6	86823513	86824630	83.5537	1.3933	0.333166	4.18199	2.88964e-05	0.000164034
1745	chr5	90429313	90434259	135.561	-1.20025	0.287282	-4.17793	2.94169e-05	0.000166574
208	chr10	121485602	121499627	1569.13	-0.783971	0.187784	-4.17486	2.98166e-05	0.00016842
806	chr15	3243905	3246486	47.7836	1.67708	0.401791	4.174	2.99298e-05	0.000168641
912	chr16	26752621	26756188	196.823	-1.14931	0.275459	-4.17236	3.01466e-05	0.000169445
1999	chr7	90301991	90304310	66.4543	1.48452	0.355892	4.17125	3.02934e-05	0.000169851
582	chr13	110557670	110559055	76.5465	1.43537	0.344447	4.16717	3.08402e-05	0.000172494
654	chr13	52040385	52042720	259.003	0.967586	0.232645	4.15906	3.19558e-05	0.000178296
137	chr1	4570859	4572818	54.2195	1.59888	0.384998	4.15295	3.28215e-05	0.00018268
222	chr10	18369437	18373396	322.523	-0.962487	0.231793	-4.15235	3.29077e-05	0.000182714
1781	chr6	127265343	127267258	42.3401	1.75022	0.421612	4.15127	3.30637e-05	0.000183135
2155	chr9	123922989	123933131	2456.25	0.745598	0.179813	4.14651	3.3758e-05	0.000186527
963	chr16	97995944	97998491	897.914	0.797427	0.192473	4.14306	3.42697e-05	0.000188795
1724	chr5	64701249	64702684	184.357	1.05418	0.254471	4.14263	3.43339e-05	0.000188795
432	chr11	76889239	76891064	83.8425	1.36219	0.328979	4.14066	3.46304e-05	0.000189967
447	chr11	84596852	84598573	468.998	1.00764	0.243878	4.13176	3.59995e-05	0.000197004
910	chr16	24253715	24255686	45.0428	-1.7308	0.419894	-4.12199	3.75615e-05	0.000205061
1367	chr2	67627759	67630311	97.5233	1.31407	0.319161	4.11725	3.83422e-05	0.000208823
457	chr11	95609956	95611348	35.3828	1.86133	0.452833	4.11041	3.9496e-05	0.000214595
614	chr13	37513474	37515578	141.754	1.17724	0.286672	4.10658	4.01558e-05	0.000217662
1002	chr17	47972531	47977325	591.096	-0.840981	0.205156	-4.09923	4.14529e-05	0.00022416
927	chr16	4585673	4587756	642.101	0.879272	0.214605	4.09717	4.18231e-05	0.000225627
2008	chr8	106411223	106412907	293.73	0.939765	0.229667	4.09185	4.2794e-05	0.000230321
626	chr13	39439567	39442450	65.512	-1.58372	0.387291	-4.08922	4.32824e-05	0.000231856
1362	chr2	61070119	61071963	31.6432	1.92867	0.471616	4.0895	4.32312e-05	0.000231856
246	chr10	3716602	3719767	251.329	0.961004	0.235127	4.08718	4.36658e-05	0.000232816
106	chr1	189985095	189986878	49.2692	-1.76903	0.432807	-4.08735	4.36329e-05	0.000232816
2140	chr9	113114706	113145798	1982.82	-0.88554	0.216731	-4.08589	4.39075e-05	0.000233559
2235	chr9	90302459	90304224	67.0636	-1.49256	0.365396	-4.08476	4.41215e-05	0.000234152
1899	chr7	118276613	118278033	95.7027	1.30065	0.318458	4.08422	4.4226e-05	0.000234162
1428	chr3	121913182	121916456	384.865	0.950498	0.23283	4.08237	4.45778e-05	0.000235478
1857	chr6	72511651	72513590	203.287	1.0534	0.258255	4.07893	4.52428e-05	0.000238439
600	chr13	30984500	30986600	145.095	1.11997	0.274747	4.07637	4.57447e-05	0.000240529
1716	chr5	53947578	53949753	116.535	1.24471	0.306005	4.06761	4.74968e-05	0.000249167
1435	chr3	129338187	129339545	91.3591	1.32191	0.325105	4.0661	4.7806e-05	0.000250214
1229	chr2	129581390	129583187	45.1574	1.65752	0.40977	4.045	5.23224e-05	0.000273226
980	chr17	29355358	29357991	149.863	1.11727	0.27631	4.04353	5.26533e-05	0.000274326
1505	chr3	94821074	94822179	203.174	1.00369	0.248345	4.04154	5.31022e-05	0.000276034
2279	chrX	99198428	99200210	91.642	1.28217	0.31735	4.04023	5.33985e-05	0.000276944
1282	chr2	167924096	167927114	197.378	1.00832	0.250136	4.0311	5.55172e-05	0.000286634
2101	chr8	61915925	61921754	208.496	1.00907	0.250322	4.03109	5.55181e-05	0.000286634
1349	chr2	44925511	44928572	1681.54	0.858969	0.213636	4.02071	5.80221e-05	0.000298886
2022	chr8	115647852	115651830	266.403	0.934697	0.232545	4.01942	5.8342e-05	0.000299857
1108	chr18	61609149	61610661	28.8382	1.93129	0.480667	4.01794	5.87103e-05	0.000301072
739	chr14	25225676	25227621	51.8429	1.5594	0.388355	4.01539	5.93463e-05	0.000303651
746	chr14	33686841	33689020	57.9594	1.52067	0.378922	4.01314	5.99175e-05	0.000305396
1878	chr6	91658979	91661318	132.607	-1.27402	0.317474	-4.01299	5.99551e-05	0.000305396
661	chr13	54410554	54414293	107.134	-1.22952	0.306767	-4.00801	6.12334e-05	0.000311102
930	chr16	49803406	49805776	86.1742	1.29903	0.324183	4.00708	6.14733e-05	0.000311102
1517	chr4	101681889	101687482	99.1304	-1.26214	0.31498	-4.00704	6.14843e-05	0.000311102
444	chr11	82565218	82566968	87.383	1.30839	0.32698	4.00145	6.29566e-05	0.000317847
1964	chr7	64047901	64050126	206.14	1.00606	0.251613	3.99844	6.37613e-05	0.000321199
853	chr15	78591001	78592627	250.716	0.938748	0.234917	3.99609	6.43971e-05	0.000323688
981	chr17	29431272	29443443	543.959	0.861735	0.21576	3.99395	6.49829e-05	0.000325914
1072	chr18	38343161	38351824	514.235	0.834549	0.209007	3.99293	6.52628e-05	0.0003266
315	chr10	93324480	93327707	238.869	0.965936	0.241972	3.99193	6.55373e-05	0.000327257
155	chr1	60952452	60954198	75.3292	1.35067	0.338622	3.98873	6.64271e-05	0.000330975
2105	chr8	68166950	68207681	1976.81	0.720945	0.180871	3.98595	6.72093e-05	0.000334143
923	chr16	43069314	43086413	451.13	-0.90413	0.226945	-3.98392	6.77875e-05	0.000336285
1307	chr2	181485512	181488752	126.352	1.15008	0.288859	3.98148	6.84889e-05	0.000339028
1719	chr5	64375612	64382124	556.041	0.836358	0.210372	3.97562	7.01947e-05	0.000346719
1011	chr17	63862132	63878946	1145.14	0.76267	0.192416	3.96366	7.38093e-05	0.000363004
1596	chr4	32169799	32171912	65.7218	-1.4891	0.375688	-3.96366	7.38097e-05	0.000363004
1337	chr2	32491945	32497132	309.408	0.884867	0.22333	3.96215	7.42771e-05	0.000364517
858	chr15	81535546	81537365	196.349	1.03871	0.262366	3.95902	7.52574e-05	0.000368535
369	chr11	20469664	20479698	469.798	0.846091	0.2139	3.95554	7.63604e-05	0.000373136
1587	chr4	150797371	150801422	217.028	-0.998439	0.25268	-3.95139	7.76981e-05	0.000378861
1259	chr2	165953833	165956334	214.53	0.963668	0.244041	3.94879	7.85478e-05	0.000382188
354	chr11	107528615	107530005	90.4584	1.27265	0.322459	3.94671	7.92316e-05	0.000384695
2125	chr8	89316457	89318238	217.787	-1.14144	0.289554	-3.94204	8.07901e-05	0.000391429
141	chr1	46907700	46909113	31.1026	1.83547	0.465862	3.93995	8.15003e-05	0.000394033
504	chr12	29290364	29291622	395.978	0.852523	0.216539	3.93704	8.2494e-05	0.000397155
646	chr13	48335962	48337860	78.2819	1.35473	0.344086	3.93718	8.24441e-05	0.000397155
1170	chr19	36817820	36819064	115.479	1.22483	0.311342	3.93404	8.35305e-05	0.000401298
1914	chr7	132346287	132348445	50.2258	1.53682	0.391348	3.92698	8.60194e-05	0.000412387
265	chr10	51762832	51764056	299.404	-0.940235	0.239605	-3.9241	8.70533e-05	0.000416469
1968	chr7	67457358	67465338	601.468	0.789986	0.201761	3.91546	9.0231e-05	0.000429869
708	chr13	99286941	99288480	102.351	1.21145	0.309384	3.9157	9.01435e-05	0.000429869
349	chr11	102379440	102382532	131.385	-1.27476	0.325648	-3.91454	9.05763e-05	0.000430615
67	chr1	157447518	157451039	150.099	1.09336	0.279489	3.912	9.15365e-05	0.000434275
2120	chr8	86617047	86618782	43.034	1.65187	0.422874	3.9063	9.37214e-05	0.000443718
2006	chr7	99359194	99360922	47.7401	1.63108	0.417654	3.90534	9.40939e-05	0.000444559
1027	chr17	83196490	83198296	56.6167	1.46902	0.376767	3.89901	9.65881e-05	0.000455401
2122	chr8	88856312	88863960	201.963	-1.0463	0.268575	-3.89576	9.78902e-05	0.000460588
401	chr11	45523407	45526345	50.4763	-1.57225	0.40427	-3.88911	0.000100612	0.000472421
812	chr15	36937652	36940038	272.598	0.946171	0.24344	3.88667	0.000101629	0.000476216
1233	chr2	135655125	135660482	585.04	0.809849	0.208546	3.88331	0.000103044	0.000481858
1206	chr2	103850747	103851588	23.3445	-2.057	0.529837	-3.88233	0.000103461	0.000482817
2167	chr9	31252522	31254480	155.277	1.03503	0.266777	3.87976	0.000104561	0.000486953
1364	chr2	62440231	62441929	76.1889	1.305	0.336513	3.878	0.000105317	0.000489478
1525	chr4	106198628	106200614	30.1719	-1.87277	0.483194	-3.87581	0.00010627	0.000492904
1153	chr19	23043821	23045882	31.0282	1.84309	0.475993	3.87208	0.00010791	0.000499492
178	chr1	86471466	86473391	149.596	1.0623	0.27465	3.86782	0.000109813	0.000507272
732	chr14	20885036	20885990	46.0628	1.56937	0.406141	3.8641	0.0001115	0.000514024
389	chr11	30290641	30292583	55.9765	1.44956	0.3754	3.86138	0.00011275	0.000518739
1998	chr7	90022464	90024639	311.235	0.888619	0.230587	3.85373	0.000116331	0.000534139
749	chr14	41197016	41199769	161.18	1.022	0.265462	3.84987	0.000118178	0.000541532
442	chr11	82006210	82007480	36.2436	1.71339	0.446486	3.83749	0.000124298	0.000568433
418	chr11	62920405	62922644	53.152	1.48206	0.386702	3.83256	0.000126817	0.000578793
1688	chr5	147834341	147836513	33.1747	1.74575	0.455641	3.83143	0.000127403	0.000580307
2187	chr9	41474655	41476845	35.5408	1.73191	0.452919	3.82389	0.000131363	0.000596239
199	chr10	117905625	117913255	304.349	0.87137	0.22789	3.82363	0.000131499	0.000596239
335	chr10	96652500	96655712	52.5571	-1.51474	0.396187	-3.82329	0.000131685	0.000596239
1736	chr5	75876390	75878374	70.6199	1.32891	0.347938	3.8194	0.000133777	0.000604515
2151	chr9	122062468	122066830	407.279	0.820901	0.215017	3.81784	0.000134627	0.000607153
1075	chr18	38519513	38521433	115.781	1.11458	0.292693	3.80802	0.000140084	0.000630515
1314	chr2	26525171	26528719	50.8359	1.48169	0.389858	3.80058	0.000144358	0.000648474
2174	chr9	32815509	32818339	66.2799	1.36132	0.358776	3.79435	0.000148031	0.00066367
2042	chr8	126526373	126531864	125.761	1.0884	0.286957	3.79292	0.000148888	0.000666201
2281	chrX	99290545	99292724	58.5387	1.41842	0.374016	3.79239	0.000149202	0.000666297
451	chr11	8688830	8690099	107.72	1.14291	0.30146	3.79125	0.000149892	0.000668074
225	chr10	19490469	19508589	690.182	-0.888159	0.234309	-3.79054	0.000150318	0.000668664
2180	chr9	32986459	32988596	62.2053	1.37271	0.362325	3.7886	0.000151498	0.000672603
2186	chr9	41461863	41464041	67.7801	1.32748	0.350547	3.78689	0.000152546	0.000675941
2089	chr8	46874971	46876908	48.7128	-1.63586	0.432106	-3.78578	0.000153226	0.000677637
1490	chr3	65973496	65976143	1354.81	0.755096	0.199577	3.78349	0.000154644	0.000682587
1371	chr2	70940000	70942799	67.4104	-1.35332	0.357787	-3.78247	0.000155283	0.000684083
653	chr13	52033071	52037319	556.134	0.766321	0.202645	3.78159	0.000155831	0.000685177
1729	chr5	65724056	65725467	291.281	0.85679	0.226881	3.77638	0.000159123	0.000698303
1921	chr7	141040812	141042076	35.329	1.67758	0.444526	3.77386	0.000160742	0.000702709
309	chr10	87044943	87046142	40.8665	1.67531	0.443918	3.77392	0.000160699	0.000702709
1407	chr3	104571122	104573009	154.049	-1.04954	0.278305	-3.7712	0.000162466	0.000707289
1291	chr2	170204417	170207151	213.508	0.942447	0.249877	3.77165	0.000162174	0.000707289
1231	chr2	131096210	131097798	63.2063	1.3621	0.361223	3.77081	0.00016272	0.000707289
847	chr15	76973940	76974574	72.2537	1.34938	0.358204	3.76709	0.000165165	0.000715722
768	chr14	63337912	63340109	59.6106	1.39122	0.369327	3.7669	0.000165287	0.000715722
416	chr11	61618833	61621605	49.6069	1.4784	0.392892	3.76287	0.000167976	0.000725988
1255	chr2	165899642	165901576	100.542	1.18387	0.315312	3.75459	0.000173623	0.000748973
1543	chr4	127277971	127279946	93.03	1.2095	0.322308	3.75263	0.000174986	0.00075343
1020	chr17	79916858	79919885	194.666	-0.952561	0.254146	-3.74808	0.000178194	0.000765796
295	chr10	8065054	8066847	214.419	0.957842	0.256084	3.74035	0.000183766	0.000787753
2056	chr8	22813812	22814990	33.1227	1.69344	0.452787	3.74004	0.000183993	0.000787753
1738	chr5	76013270	76017287	80.0563	1.24598	0.333573	3.73526	0.000187523	0.000801363
1766	chr6	108709224	108710460	37.4093	1.62887	0.436704	3.72992	0.000191541	0.000817005
34	chr1	135652873	135660525	342.576	0.824081	0.221029	3.72838	0.000192715	0.000820476
1062	chr18	34116053	34119462	151.654	1.01875	0.27336	3.72678	0.000193945	0.000824175
242	chr10	3630321	3632161	74.9478	1.33656	0.358889	3.72417	0.000195962	0.000831199
1114	chr18	73541518	73542637	97.8143	1.1936	0.320828	3.72039	0.000198918	0.000840614
1657	chr5	114979173	114985893	656.17	-0.811961	0.218246	-3.7204	0.000198905	0.000840614
866	chr15	85633556	85636050	735.687	0.71289	0.19184	3.71606	0.000202354	0.000853551
1180	chr19	41481202	41484288	2186.72	0.650078	0.175225	3.70997	0.000207286	0.000872743
792	chr14	78731635	78734064	640.022	0.785095	0.211838	3.70611	0.000210465	0.000884495
2144	chr9	120690759	120692677	94.118	1.15758	0.31286	3.7	0.000215603	0.000902762
70	chr1	161377752	161382196	215.724	-0.938968	0.253759	-3.70024	0.000215397	0.000902762
916	chr16	32710077	32711184	75.296	1.25654	0.340253	3.69296	0.000221661	0.000926428
1689	chr5	148976136	148996574	1942.45	-0.672374	0.182302	-3.68825	0.000225798	0.000941996
317	chr10	93918056	93920524	61.7242	1.35682	0.368218	3.68482	0.000228867	0.000953057
1287	chr2	170147143	170148407	63.5601	1.31827	0.357853	3.68382	0.000229762	0.000955039
693	chr13	9012419	9017939	155.725	-1.05145	0.285703	-3.6802	0.000233048	0.000966938
2219	chr9	72131922	72134675	517.721	0.820478	0.223077	3.678	0.000235069	0.00097355
1248	chr2	160621011	160623214	309.051	0.867392	0.235947	3.67621	0.000236723	0.000977298
438	chr11	79752557	79758691	242.231	-0.911836	0.248045	-3.6761	0.00023683	0.000977298
1626	chr4	81504353	81506101	48.5825	-1.49633	0.407473	-3.67221	0.000240459	0.000990482
713	chr14	100749361	100751357	205.973	0.911884	0.248403	3.67099	0.000241613	0.000993442
538	chr12	75765462	75770408	227.269	0.935061	0.254868	3.6688	0.000243691	0.00100018
1220	chr2	124553404	124556604	71.305	1.30899	0.357178	3.66482	0.000247511	0.00101404
1693	chr5	149244767	149248715	526.475	0.755383	0.206425	3.65936	0.000252845	0.00103404
939	chr16	87049241	87050846	25.7602	1.84735	0.505048	3.65777	0.000254418	0.00103861
161	chr1	64303867	64306722	251.071	0.860867	0.235475	3.65587	0.000256308	0.00104446
2045	chr8	126648683	126668030	4060.3	-0.649383	0.177992	-3.64838	0.000263904	0.00107349
1393	chr2	93141908	93143977	40.0029	1.58029	0.433377	3.64646	0.000265882	0.00107961
506	chr12	32681181	32683351	20.9645	-1.94023	0.53261	-3.64287	0.000269616	0.00109283
1210	chr2	116971281	116972994	141.741	1.08057	0.296735	3.64155	0.000271001	0.0010965
484	chr12	16864854	16866286	121.12	1.10332	0.303041	3.64083	0.000271759	0.00109762
772	chr14	67188229	67189100	73.0628	1.24434	0.341904	3.63944	0.000273228	0.0011016
50	chr1	152287040	152289176	23.0185	1.87293	0.514974	3.63694	0.000275901	0.00111042
835	chr15	67038988	67040690	101.837	1.15367	0.317252	3.63646	0.000276409	0.0011105
1840	chr6	52485619	52487126	149.893	1.0015	0.275523	3.63492	0.000278062	0.00111512
172	chr1	72808605	72812270	189.755	-0.920455	0.253256	-3.63449	0.000278535	0.00111512
1359	chr2	58740880	58745464	542.218	-0.765375	0.210667	-3.6331	0.000280034	0.00111916
1414	chr3	115814898	115816991	304.876	0.832542	0.229396	3.62928	0.000284214	0.00112751
212	chr10	125160808	125167049	473.961	-0.782373	0.215523	-3.63012	0.000283292	0.00112751
509	chr12	34707442	34715369	141.751	1.10642	0.304927	3.62849	0.000285089	0.00112751
1713	chr5	51390660	51392223	35.42	-1.63379	0.450071	-3.63006	0.000283353	0.00112751
1034	chr17	83951871	83956847	122.247	1.04233	0.287248	3.62867	0.000284885	0.00112751
1069	chr18	36319114	36329869	893.012	0.696623	0.191919	3.62978	0.000283664	0.00112751
1890	chr7	104369089	104370598	84.5808	1.21642	0.33553	3.62538	0.000288538	0.00113918
170	chr1	72762324	72775095	335.314	-0.935068	0.258007	-3.6242	0.000289862	0.00114243
437	chr11	79305286	79307546	272	0.830233	0.229177	3.62267	0.000291575	0.0011472
699	chr13	93538829	93540736	29.4487	-1.72443	0.476266	-3.62074	0.000293759	0.0011538
1718	chr5	64155488	64156945	73.2466	1.23984	0.342986	3.61483	0.000300549	0.00117844
240	chr10	24947221	24952941	337.995	-0.811876	0.22466	-3.61379	0.000301752	0.00117911
423	chr11	68622910	68624245	32.331	1.65993	0.459296	3.61407	0.000301429	0.00117911
267	chr10	56443797	56445602	68.1414	1.2905	0.357268	3.61214	0.000303678	0.0011846
1631	chr4	9026926	9028675	27.2314	1.76444	0.489019	3.60812	0.000308424	0.00120024
1401	chr3	101778457	101780164	37.5414	1.56771	0.434581	3.60741	0.000309264	0.00120024
1164	chr19	32959501	32979353	487.05	-0.748579	0.207486	-3.60785	0.000308742	0.00120024
346	chr11	101711991	101715161	158.152	-1.0411	0.288644	-3.60687	0.000309909	0.0012007
580	chr13	107953077	107955006	98.8348	1.11552	0.309384	3.60561	0.000311424	0.00120452
460	chr11	97308917	97310823	120.249	1.04341	0.289675	3.60199	0.000315786	0.00121933
92	chr1	181852225	181854287	138.342	1.006	0.27963	3.59762	0.000321138	0.0012379
1071	chr18	38144320	38146054	100.786	1.2323	0.342743	3.5954	0.000323895	0.00124642
737	chr14	24778824	24780512	107.762	1.09173	0.30377	3.59395	0.000325703	0.00125127
189	chr10	110706533	110708738	65.6771	-1.31709	0.366827	-3.5905	0.000330041	0.00126368
1574	chr4	138414084	138415484	56.0442	1.36695	0.380684	3.59077	0.000329704	0.00126368
36	chr1	136569026	136571829	235.433	0.879491	0.245083	3.58855	0.000332523	0.00127105
1885	chr7	101073698	101075494	62.9526	1.29162	0.360428	3.58358	0.000338919	0.00129333
620	chr13	37714069	37716568	49.2107	-1.43701	0.401064	-3.58298	0.000339692	0.00129412
1917	chr7	139364594	139367267	48.7617	1.43184	0.399676	3.58251	0.000340312	0.00129432
216	chr10	126926133	126929987	341.75	0.83171	0.23238	3.5791	0.00034478	0.00130913
968	chr17	13682234	13684511	113.992	1.11603	0.312056	3.57638	0.000348391	0.00132064
1681	chr5	146020501	146025758	214.019	0.988739	0.276574	3.57496	0.00035028	0.00132474
1077	chr18	38630706	38633776	112.69	1.12049	0.313451	3.5747	0.000350632	0.00132474
2066	chr8	34215340	34217021	52.5966	1.38312	0.387148	3.57258	0.000353482	0.0013333
153	chr1	60733802	60736564	62.7715	1.37097	0.38385	3.57164	0.00035475	0.00133587
173	chr1	73188092	73190347	52.2244	1.39303	0.390173	3.57029	0.000356584	0.00134057
90	chr1	181234102	181241797	382.618	0.769047	0.215479	3.56901	0.000358336	0.00134494
2150	chr9	122050525	122053152	85.9306	1.18395	0.331819	3.56805	0.000359646	0.00134764
1268	chr2	167366797	167369570	157.621	1.02596	0.287949	3.563	0.000366646	0.00137162
843	chr15	75212600	75223912	2106.61	-0.666743	0.187193	-3.56179	0.000368335	0.00137551
2244	chr9	98674771	98676790	31.7963	1.62933	0.457497	3.56139	0.000368892	0.00137551
215	chr10	126905073	126906241	463.313	0.739889	0.207783	3.56088	0.000369616	0.00137596
1159	chr19	30201666	30203594	66.9641	-1.25728	0.353822	-3.55342	0.000380264	0.00141329
465	chr12	100167498	100169359	125.04	1.00969	0.28481	3.54514	0.000392398	0.00145602
1443	chr3	149219003	149222402	180.089	0.935609	0.264022	3.54368	0.000394585	0.00146176
1633	chr4	95105733	95107431	47.2769	1.46291	0.413345	3.53921	0.000401333	0.00148435
379	chr11	22584167	22585649	80.3793	1.17377	0.331714	3.5385	0.000402413	0.00148593
272	chr10	60268632	60270398	64.5393	1.26113	0.357516	3.52749	0.000419519	0.0015466
2139	chr9	110752840	110756049	38.0775	1.51171	0.42867	3.52652	0.000421062	0.00154978
2236	chr9	94376961	94378567	43.1	-1.48053	0.419992	-3.52513	0.00042327	0.0015554
1120	chr18	80168786	80172106	161.961	0.929848	0.264112	3.52066	0.000430482	0.00157936
1000	chr17	47841716	47843551	62.9487	1.28096	0.363937	3.51974	0.000431968	0.00158116
168	chr1	71836458	71838700	72.555	-1.25115	0.355492	-3.5195	0.000432359	0.00158116
642	chr13	45451490	45456616	163.757	0.939182	0.266915	3.51866	0.000433735	0.00158365
20	chr1	130549958	130552832	156.312	0.969425	0.275824	3.51466	0.000440323	0.00160258
752	chr14	47360662	47363192	107.997	1.06866	0.304048	3.51477	0.000440143	0.00160258
124	chr1	31014862	31017217	148.076	-1.03884	0.296093	-3.50849	0.000450662	0.0016376
777	chr14	73116364	73118454	78.8197	1.16537	0.332338	3.50657	0.000453926	0.00164684
1733	chr5	74943233	74945056	83.0877	1.16557	0.332509	3.50537	0.000455969	0.00165162
1827	chr6	39255854	39259631	190.589	0.90783	0.259191	3.50255	0.000460824	0.00166656
1573	chr4	137364774	137374547	792.983	0.675011	0.192759	3.50184	0.000462056	0.00166837
1923	chr7	141122391	141124321	277.31	0.809465	0.231271	3.50008	0.000465127	0.00167681
2015	chr8	109981525	109985369	125.229	-1.02381	0.292766	-3.49703	0.000470467	0.00169338
1658	chr5	115500150	115501419	92.217	1.10585	0.316435	3.49472	0.000474551	0.00170004
434	chr11	79213826	79214725	77.615	1.20325	0.344293	3.49485	0.000474321	0.00170004
979	chr17	28509667	28519879	1370.04	0.64668	0.185002	3.49553	0.00047312	0.00170004
58	chr1	154149443	154151467	23.3047	-1.80483	0.516562	-3.49392	0.000475979	0.00170248
1506	chr3	96300336	96302307	163.448	1.00671	0.288178	3.49335	0.000477002	0.00170347
1310	chr2	25109889	25112472	114.828	1.02159	0.292506	3.49255	0.000478441	0.00170594
1064	chr18	35093331	35094671	104.776	1.15005	0.329774	3.48738	0.000487772	0.00173387
1081	chr18	38795231	38797124	89.221	1.12749	0.323305	3.48737	0.000487794	0.00173387
2208	chr9	59133788	59135538	29.9285	1.64781	0.473119	3.48287	0.000496069	0.00176054
1056	chr18	20929391	20933151	282.039	-0.994	0.285652	-3.47976	0.000501871	0.00177837
1446	chr3	149329969	149331406	45.8008	1.40488	0.404252	3.47525	0.000510383	0.00180573
347	chr11	101728371	101730279	58.5388	-1.32006	0.380288	-3.4712	0.000518134	0.00183031
1102	chr18	5931436	5932920	109.95	1.08909	0.313881	3.46974	0.000520958	0.00183744
1017	chr17	73033930	73036220	190.914	0.872015	0.251435	3.46815	0.000524051	0.0018455
723	chr14	105731952	105733997	106.919	1.03664	0.299053	3.46641	0.000527466	0.00185466
268	chr10	59636519	59649097	231.095	0.90043	0.260025	3.46286	0.000534462	0.00187637
1054	chr18	11793132	11795423	224.638	0.876366	0.253118	3.46229	0.000535609	0.00187751
1615	chr4	56113081	56114615	49.226	1.36789	0.395232	3.461	0.000538182	0.0018821
1318	chr2	27565029	27566496	42.7472	1.48193	0.428204	3.4608	0.000538568	0.0018821
2185	chr9	41272563	41274263	46.5929	1.41339	0.408786	3.45752	0.000545165	0.00190224
1670	chr5	137075374	137077472	37.1335	1.54969	0.448619	3.45435	0.00055162	0.0019189
28	chr1	134085886	134087450	102.93	1.09919	0.318181	3.4546	0.000551108	0.0019189
1892	chr7	106620241	106623905	299.32	-0.822273	0.238231	-3.45158	0.000557307	0.00193569
555	chr12	85444127	85445701	207.419	0.944161	0.273576	3.45118	0.000558144	0.00193569
2238	chr9	94473160	94474830	93.4768	-1.17373	0.34072	-3.44486	0.000571364	0.00197853
751	chr14	45982139	45984375	55.8744	-1.30702	0.379857	-3.44083	0.000579929	0.00200515
906	chr16	24102458	24104151	62.4653	-1.24431	0.362211	-3.43532	0.000591854	0.00204328
2169	chr9	32027246	32033501	368.582	0.756137	0.22037	3.43122	0.000600881	0.00207131
187	chr10	100159656	100160901	78.3176	1.14429	0.333836	3.42771	0.000608692	0.00209507
1416	chr3	116184263	116185708	887.683	0.75593	0.220587	3.4269	0.000610511	0.00209817
1025	chr17	80800338	80803044	66.3028	1.24817	0.36432	3.42603	0.00061247	0.00210174
2149	chr9	122026061	122029524	199.637	0.903746	0.263896	3.42462	0.000615649	0.00210948
1876	chr6	90539262	90545956	469.47	-0.752028	0.219653	-3.42371	0.000617735	0.00211345
1584	chr4	150722712	150727834	93.1418	-1.10128	0.322141	-3.41863	0.000629383	0.00215008
2179	chr9	32939322	32942737	208.454	0.845368	0.247449	3.41634	0.000634697	0.00216499
935	chr16	78216809	78218778	242.109	0.822629	0.240887	3.41501	0.000637807	0.00217235
2202	chr9	48611755	48613751	36.8897	-1.57583	0.462089	-3.41023	0.000649083	0.00220746
690	chr13	74614756	74618855	271.98	0.787946	0.231091	3.40967	0.00065041	0.00220868
62	chr1	155243528	155245208	53.4553	1.40839	0.413189	3.40859	0.000653002	0.00221419
1557	chr4	132958399	132962262	182.663	0.956241	0.281091	3.4019	0.000669198	0.00226574
1322	chr2	30546298	30550142	70.1989	1.21358	0.357144	3.39801	0.000678786	0.00229141
1234	chr2	136677930	136680303	428.098	0.739013	0.217466	3.39829	0.000678096	0.00229141
2268	chrX	20797836	20799352	64.9454	1.2081	0.355788	3.39555	0.00068491	0.00230866
1805	chr6	145709510	145717867	127.737	-1.03577	0.305866	-3.38634	0.000708322	0.00238406
1514	chr3	98586736	98588950	20.439	-1.81147	0.535118	-3.38517	0.000711347	0.00239071
1960	chr7	60390734	60391664	94.5126	1.05405	0.311432	3.38453	0.000713004	0.00239276
528	chr12	69422634	69423620	94.7541	1.10186	0.325796	3.38206	0.000719452	0.00241085
367	chr11	19918886	19920832	220.868	0.84194	0.249092	3.38004	0.000724763	0.00242509
1018	chr17	73961673	73963698	51.193	1.3263	0.392621	3.37808	0.000729947	0.00243886
1993	chr7	83808821	83811519	67.6106	1.18026	0.349449	3.37749	0.000731497	0.00244046
2078	chr8	45874803	45876305	83.034	1.17007	0.346518	3.37666	0.000733728	0.00244433
419	chr11	63412194	63413929	27.27	1.62609	0.48221	3.37217	0.000745786	0.00248088
588	chr13	112099784	112101950	76.9281	1.16619	0.346178	3.36876	0.000755085	0.00250816
1759	chr5	96916720	96924082	335.328	0.768699	0.228367	3.36608	0.000762458	0.00252897
1109	chr18	62100597	62102447	39.8643	1.4561	0.432633	3.36567	0.00076357	0.00252898
2058	chr8	24395532	24398624	127.863	1.01505	0.301629	3.36521	0.000764863	0.00252959
203	chr10	118102695	118104009	107.664	1.03299	0.307092	3.36378	0.00076883	0.00253903
94	chr1	182668977	182671725	41.9361	1.41972	0.422914	3.35699	0.000787953	0.00259842
1503	chr3	87333417	87335276	94.8379	1.11617	0.332542	3.35647	0.000789434	0.00259955
190	chr10	111093603	111095280	87.6775	1.08475	0.323394	3.35426	0.000795783	0.00261668
121	chr1	23183960	23185616	59.291	1.309	0.390785	3.34966	0.0008091	0.00265664
986	chr17	31869613	31883616	643.068	0.830269	0.247937	3.3487	0.000811903	0.00266202
1675	chr5	142370597	142372914	156.469	0.890472	0.266049	3.34702	0.000816863	0.00267444
1895	chr7	110163567	110165813	243.633	0.840286	0.251104	3.34637	0.000818781	0.00267687
1992	chr7	80844787	80847508	234.207	0.802962	0.240072	3.34467	0.000823808	0.00268946
1192	chr19	5809430	5811244	109.132	1.0873	0.32531	3.34236	0.000830691	0.00270805
1979	chr7	71370021	71372227	93.8632	1.04132	0.311743	3.34031	0.000836842	0.00272421
1618	chr4	59276900	59284038	123.436	0.978235	0.29317	3.33675	0.000847633	0.00275541
787	chr14	76796848	76799384	88.2567	-1.06976	0.320667	-3.33605	0.000849772	0.00275844
2001	chr7	97747817	97750146	219.965	0.82946	0.248727	3.33482	0.000853542	0.00276674
72	chr1	165716975	165719481	349.021	0.725063	0.217514	3.33341	0.000857897	0.00277691
1053	chr18	11351673	11353395	66.0913	1.17861	0.353697	3.33227	0.000861414	0.00278434
1078	chr18	38667667	38671919	90.5163	-1.08338	0.325305	-3.33034	0.000867392	0.00279575
1676	chr5	142920270	142921749	81.7076	1.10057	0.330435	3.33065	0.000866424	0.00279575
1990	chr7	80129541	80130590	252.991	1.0163	0.305325	3.32859	0.000872878	0.00280946
1203	chr19	9953686	9960900	504.989	-0.710272	0.213586	-3.32546	0.000882741	0.00283031
2061	chr8	25117919	25119864	51.5268	-1.29232	0.388541	-3.32608	0.000880756	0.00283031
302	chr10	82354017	82357379	376.812	0.74391	0.223709	3.32535	0.000883077	0.00283031
703	chr13	97438738	97440438	39.292	-1.42712	0.429356	-3.32387	0.000887769	0.00284136
826	chr15	59727539	59731154	95.4863	1.02827	0.309437	3.32304	0.000890416	0.00284584
1392	chr2	93134496	93136709	33.2268	1.53844	0.463778	3.31719	0.000909292	0.0029021
133	chr1	39735408	39737461	141.599	0.922227	0.278106	3.3161	0.000912843	0.00290531
1324	chr2	30651201	30653866	49.4306	1.3386	0.403655	3.3162	0.000912512	0.00290531
261	chr10	44691189	44692965	161.128	0.882383	0.2662	3.31473	0.000917302	0.00291544
577	chr13	107615856	107617660	66.5639	1.18236	0.357348	3.30871	0.000937262	0.00297473
1270	chr2	167415596	167416911	131.759	-1.00968	0.305249	-3.30773	0.000940552	0.00298103
236	chr10	23076254	23077571	63.6434	1.2498	0.377914	3.30711	0.000942628	0.00298346
617	chr13	37624897	37627107	544.422	-0.681131	0.206098	-3.30489	0.000950125	0.00300303
2162	chr9	22385005	22390291	1408.9	0.699786	0.211805	3.30391	0.000953458	0.00300939
445	chr11	82570308	82572477	78.9536	1.09619	0.331962	3.30215	0.000959477	0.00302399
1562	chr4	133774234	133776115	137.686	0.92675	0.280682	3.30178	0.000960735	0.00302399
1786	chr6	136447389	136450366	123.175	0.940324	0.285131	3.29787	0.000974224	0.00305802
402	chr11	5154930	5156445	49.6325	1.2913	0.391528	3.29809	0.00097344	0.00305802
1794	chr6	142714143	142716372	26.1097	1.62265	0.492403	3.29536	0.000982946	0.00308116
2273	chrX	48313978	48315802	165.643	0.946442	0.287257	3.29476	0.000985045	0.0030835
1374	chr2	71672761	71674294	29.5802	1.55107	0.472058	3.28575	0.0010171	0.0031783
13	chr1	119288390	119296602	401.406	-0.750103	0.228309	-3.28547	0.00101811	0.0031783
2116	chr8	83874753	83876396	84.8144	1.07656	0.32775	3.28468	0.00102097	0.00318287
1987	chr7	73616093	73619910	2290.44	0.619335	0.188827	3.27992	0.00103838	0.00323272
458	chr11	96987658	96988851	83.0645	1.10625	0.337448	3.27828	0.00104441	0.00324706
1097	chr18	5443454	5445084	77.843	1.12628	0.343861	3.27539	0.00105517	0.00327606
8	chr1	119188457	119198808	225.042	-0.801167	0.244831	-3.27233	0.00106664	0.00330718
87	chr1	180301553	180303833	75.3768	1.10817	0.338779	3.27106	0.00107144	0.00331754
177	chr1	85751299	85752645	70.0053	1.15099	0.352119	3.26875	0.00108025	0.00334028
287	chr10	7289428	7290959	48.3252	1.28938	0.395008	3.26419	0.00109776	0.00338773
1595	chr4	31454877	31457614	83.7972	1.08419	0.332168	3.26399	0.00109856	0.00338773
1570	chr4	136080677	136083991	133.741	0.954266	0.292398	3.26359	0.0011001	0.00338789
1854	chr6	72276914	72278124	28.2279	1.54472	0.473739	3.2607	0.00111139	0.00341804
1772	chr6	122653430	122655504	176.405	0.873559	0.267984	3.25974	0.00111513	0.00342495
960	chr16	94723916	94724972	104.559	1.03309	0.317168	3.25724	0.001125	0.0034506
2023	chr8	117675468	117678582	493.302	-0.707932	0.217424	-3.25599	0.00112997	0.00346119
7	chr1	119172316	119174237	60.6818	-1.27437	0.391535	-3.25481	0.00113468	0.00347095
2029	chr8	120814869	120818531	223.737	0.781282	0.240162	3.25314	0.00114136	0.00348208
1901	chr7	120834378	120836533	960.696	0.605792	0.186207	3.25333	0.00114061	0.00348208
2237	chr9	94454593	94456981	63.1287	-1.22881	0.378338	-3.24791	0.00116257	0.00354203
501	chr12	25329415	25331806	58.7545	1.20682	0.372284	3.24168	0.00118829	0.00361076
376	chr11	20957682	20959133	33.6508	1.44249	0.444936	3.24201	0.00118691	0.00361076
318	chr10	94355904	94362695	210.23	0.846186	0.261082	3.24108	0.00119079	0.00361355
1504	chr3	8765978	8768309	84.6406	1.04383	0.322287	3.23883	0.00120022	0.00363732
280	chr10	67741611	67743324	76.9717	1.08847	0.336446	3.2352	0.00121557	0.00367872
380	chr11	22629143	22631377	67.6805	1.18712	0.366981	3.23484	0.0012171	0.00367872
665	chr13	56221047	56223249	40.9372	1.35039	0.418221	3.22889	0.00124273	0.00375121
136	chr1	40175063	40177066	26.0951	-1.68082	0.521987	-3.22005	0.00128169	0.0038637
631	chr13	41551736	41553995	343.284	0.7104	0.220751	3.2181	0.00129042	0.00388487
1438	chr3	142935872	142936885	53.1862	1.22236	0.380099	3.2159	0.00130036	0.00390965
426	chr11	72581297	72589646	249.825	0.805291	0.250704	3.21212	0.00131762	0.00395112
2104	chr8	68095607	68121950	1106.85	0.604686	0.188248	3.21217	0.00131734	0.00395112
467	chr12	102449710	102457232	499.625	0.672869	0.209539	3.21119	0.00132188	0.0039587
2264	chrX	167179066	167181225	95.1347	1.01461	0.316314	3.20761	0.00133841	0.00400296
1437	chr3	131483876	131497697	916.321	0.68203	0.212658	3.20717	0.00134049	0.00400393
556	chr12	85454719	85456853	247.59	0.794559	0.247866	3.2056	0.00134782	0.00402055
672	chr13	59834803	59836785	207.909	0.876861	0.273851	3.20196	0.00136496	0.00406638
1627	chr4	81743640	81745536	42.0405	1.32469	0.414339	3.19711	0.00138813	0.00413
488	chr12	18609727	18610351	95.5052	1.14928	0.359775	3.19443	0.00140108	0.00415841
543	chr12	79944122	79945891	46.353	1.27673	0.399682	3.19438	0.00140132	0.00415841
77	chr1	170997355	170999264	209.091	0.797497	0.250048	3.18938	0.00142578	0.0042255
679	chr13	62682606	62685446	139.311	0.917567	0.288352	3.1821	0.0014621	0.0043275
744	chr14	31933675	31936907	80.4316	1.04115	0.327446	3.17962	0.00147471	0.00435353
1791	chr6	141866846	141875645	765.924	-0.671803	0.211278	-3.17971	0.00147425	0.00435353
1397	chr3	10051355	10053172	25.1636	1.55776	0.490261	3.1774	0.00148603	0.00438129
2154	chr9	122310338	122311412	64.3209	1.18772	0.373944	3.17621	0.00149215	0.00439367
326	chr10	95770864	95775175	184.582	-0.817602	0.257838	-3.17099	0.00151918	0.00446749
1405	chr3	104522313	104524415	40.9216	1.31769	0.415601	3.17056	0.00152145	0.00446841
2224	chr9	77717756	77721993	115.646	0.965238	0.304495	3.16996	0.00152461	0.00447192
1082	chr18	38803882	38805360	50.8315	1.26705	0.400254	3.16562	0.00154752	0.0045333
1066	chr18	35917747	35920774	257.448	0.737644	0.233179	3.16342	0.00155927	0.00456188
241	chr10	3590974	3592611	42.1804	1.29969	0.41095	3.16264	0.00156344	0.00456821
833	chr15	63616385	63617398	44.7292	1.35358	0.428054	3.16216	0.00156602	0.00456989
789	chr14	76827275	76830295	95.8641	-1.15518	0.365504	-3.16051	0.00157491	0.00458996
1459	chr3	32395427	32409574	1993.44	0.571054	0.180771	3.159	0.00158312	0.004608
527	chr12	69363474	69365305	783.75	0.629676	0.199484	3.15652	0.00159664	0.00464143
1737	chr5	75896171	75897450	61.2541	1.14167	0.361762	3.15587	0.0016002	0.00464587
1125	chr18	82855072	82857058	341.638	0.698499	0.221414	3.15471	0.00160655	0.00465248
352	chr11	103285656	103287253	32.5436	1.45202	0.460261	3.15478	0.00160618	0.00465248
536	chr12	71354083	71364113	205.998	-0.791396	0.25095	-3.1536	0.0016127	0.00466437
1958	chr7	48916475	48921739	75.9772	1.05092	0.333681	3.14946	0.00163572	0.00472494
2130	chr8	94703655	94704238	580.971	0.659848	0.20958	3.14843	0.0016415	0.00473565
875	chr15	93824611	93826106	43.0337	1.2988	0.413495	3.14103	0.00168357	0.00485089
1477	chr3	52526057	52529295	34.6535	-1.39566	0.444567	-3.13937	0.00169312	0.00487226
940	chr16	87127740	87129319	32.1225	1.44095	0.459236	3.13772	0.00170267	0.00489356
433	chr11	76893135	76895135	32.7627	1.46309	0.466355	3.13728	0.00170525	0.00489481
729	chr14	16597247	16598848	35.5834	1.40386	0.447582	3.13655	0.00170947	0.00490077
695	chr13	9074990	9077394	32.0598	-1.45682	0.464564	-3.13589	0.00171336	0.00490574
1281	chr2	167886536	167889982	348.178	-0.801819	0.256042	-3.1316	0.00173859	0.00497174
872	chr15	88489964	88491671	172.069	0.831607	0.265957	3.12685	0.00176689	0.00504637
1449	chr3	151424124	151425715	105.905	0.94539	0.302681	3.12339	0.0017878	0.00509969
2280	chrX	99215030	99217909	86.1141	1.01258	0.324655	3.11893	0.00181509	0.00517107
283	chr10	68867800	68870247	74.8203	1.05379	0.33797	3.11801	0.00182078	0.00518082
1426	chr3	121893021	121901526	133.863	1.00172	0.322047	3.11047	0.00186788	0.00530823
725	chr14	118088281	118091058	178.49	0.821835	0.264663	3.10521	0.00190144	0.00539688
1926	chr7	142397397	142401857	132.088	0.890705	0.286916	3.10442	0.00190655	0.00539796
385	chr11	23147486	23149236	53.9365	-1.26522	0.407553	-3.10443	0.00190646	0.00539796
2019	chr8	115477374	115480255	68.6245	1.07521	0.346655	3.10166	0.00192439	0.00544171
1227	chr2	129329510	129332502	80.9128	1.03993	0.3355	3.09964	0.00193757	0.00547218
1058	chr18	31621350	31622972	179.688	-0.88777	0.286756	-3.09591	0.0019621	0.00553461
2114	chr8	83747075	83752983	383.95	0.673619	0.217745	3.09362	0.00197729	0.0055706
793	chr14	86321211	86323360	85.1626	0.994818	0.321897	3.09048	0.00199832	0.00562289
1821	chr6	3181898	3184196	41.3106	-1.30374	0.422083	-3.08883	0.00200945	0.00564724
1959	chr7	60242975	60244724	222.022	0.76866	0.248975	3.0873	0.0020198	0.00566936
800	chr15	25484778	25490691	67.301	1.08467	0.3514	3.08671	0.00202385	0.00567375
1037	chr17	84071973	84075774	89.0918	0.999445	0.323916	3.08551	0.00203205	0.00568974
1599	chr4	34885956	34887835	915.802	0.59042	0.191643	3.08083	0.00206426	0.00577286
1409	chr3	109254793	109255521	48.2909	1.2111	0.393354	3.0789	0.00207768	0.00580327
2071	chr8	35414536	35422838	239.692	-0.763041	0.247967	-3.07719	0.00208965	0.00582956
188	chr10	108443852	108448102	89.9411	0.971694	0.316039	3.0746	0.00210782	0.00587306
1720	chr5	64504793	64506664	127.472	0.866675	0.282375	3.06924	0.00214608	0.00597237
1118	chr18	76663272	76665455	41.8216	-1.27814	0.417693	-3.06	0.00221339	0.00615219
2098	chr8	47461189	47462578	24.4824	1.50781	0.493176	3.05735	0.002233	0.00619916
1997	chr7	89558061	89559713	25.4509	1.49132	0.488013	3.05589	0.0022439	0.0062143
1610	chr4	53216909	53218721	133.521	0.859349	0.281183	3.05619	0.00224171	0.0062143
1735	chr5	75833657	75837059	80.3714	1.03819	0.340133	3.0523	0.00227093	0.00628152
1650	chr5	110056246	110058518	113.881	0.973141	0.319341	3.04734	0.00230873	0.00637837
275	chr10	66851868	66853909	62.1352	1.09796	0.360875	3.0425	0.00234618	0.00647399
1257	chr2	165935757	165937720	70.0059	1.09841	0.361834	3.03566	0.00240008	0.00661471
565	chr12	86835815	86837158	119.277	0.924077	0.30509	3.02887	0.00245468	0.00675705
1746	chr5	90439901	90442838	99.1655	-0.973536	0.321924	-3.02412	0.00249357	0.00685581
942	chr16	87660761	87662292	78.566	1.01414	0.335531	3.02249	0.00250708	0.00688467
394	chr11	34030888	34032526	86.7005	0.966455	0.320054	3.01966	0.00253059	0.00693639
2007	chr8	106393847	106395296	41.8225	1.24162	0.411201	3.01949	0.002532	0.00693639
1743	chr5	9038519	9046303	732.559	-0.5938	0.19725	-3.01039	0.00260908	0.00713046
1357	chr2	51981181	51982655	45.2453	1.24135	0.412323	3.01062	0.00260718	0.00713046
1085	chr18	43436010	43437545	35.4138	1.34101	0.445603	3.00943	0.00261736	0.00714452
1706	chr5	33695135	33696136	31.2215	1.39283	0.463545	3.00473	0.00265821	0.00724735
517	chr12	52395810	52397099	48.7771	-1.19868	0.39901	-3.00414	0.00266335	0.0072527
1545	chr4	128839205	128840937	241.013	0.709342	0.236165	3.00359	0.00266813	0.00725532
880	chr15	96857331	96858897	27.0177	-1.48114	0.493171	-3.0033	0.00267067	0.00725532
59	chr1	155049345	155051994	101.733	0.933349	0.310896	3.00212	0.00268105	0.00727485
1822	chr6	3345148	3345428	28.8593	1.40081	0.467097	2.99897	0.00270892	0.00734175
2024	chr8	119901165	119902126	53.2089	1.13761	0.379751	2.99568	0.00273835	0.00741271
637	chr13	44026841	44027905	39.3708	1.25804	0.420194	2.99394	0.00275397	0.00744617
650	chr13	51842174	51843376	66.819	1.05275	0.351972	2.99102	0.00278051	0.00750901
1340	chr2	32513597	32515319	38.6264	1.27119	0.425266	2.98917	0.0027974	0.0075457
2261	chrX	140663964	140669488	270.734	0.70394	0.235918	2.98383	0.00284666	0.0076695
1880	chr6	94998398	95000062	29.7791	-1.43622	0.482271	-2.97803	0.00290108	0.00777664
1194	chr19	61199608	61200547	4066.16	-0.760898	0.25541	-2.97913	0.00289071	0.00777664
1723	chr5	64679469	64681034	91.2385	0.932938	0.313227	2.97847	0.00289689	0.00777664
1580	chr4	150211956	150213155	90.5047	0.952798	0.319969	2.97778	0.00290346	0.00777664
2009	chr8	107114213	107115310	40.7627	1.2786	0.42929	2.97841	0.00289751	0.00777664
2250	chrX	12164702	12166080	39.6325	1.25109	0.420268	2.97688	0.00291195	0.00779023
211	chr10	123846053	123848019	33.3801	-1.35373	0.454851	-2.97621	0.00291833	0.00779817
171	chr1	72804628	72807154	161.391	-0.825541	0.277433	-2.97564	0.00292375	0.00780351
474	chr12	111034795	111036272	197.164	0.741597	0.249507	2.97225	0.00295624	0.00788101
1838	chr6	51719775	51721788	42.6444	-1.25215	0.421874	-2.96807	0.00299676	0.0079797
266	chr10	53381896	53383890	146.038	-0.861804	0.29066	-2.96499	0.00302691	0.0080506
1683	chr5	146669498	146689221	436.857	0.738806	0.249511	2.96102	0.00306626	0.00814577
1145	chr19	21881172	21883623	91.8751	0.937797	0.31684	2.95985	0.00307792	0.00816722
1117	chr18	75341646	75343998	369.284	0.652003	0.22073	2.95385	0.00313842	0.00831808
1589	chr4	153876480	153878749	73.358	1.02792	0.348065	2.95323	0.00314464	0.0083249
139	chr1	45863627	45870301	504.603	0.604566	0.204795	2.95206	0.00315667	0.00834706
2183	chr9	40581652	40583372	135.756	0.822627	0.27887	2.94985	0.00317925	0.00839704
722	chr14	103903636	103905033	45.7306	1.19574	0.405571	2.94829	0.00319532	0.00842975
989	chr17	34294825	34297096	81.7946	0.999038	0.33903	2.94676	0.00321127	0.00846203
1810	chr6	17628042	17630901	79.7815	0.97228	0.330175	2.94474	0.00323224	0.00850745
1764	chr6	100143074	100144984	64.9654	1.0427	0.354184	2.94394	0.00324064	0.00851974
118	chr1	194481881	194483322	25.3642	-1.5386	0.522982	-2.94197	0.00326131	0.00856422
244	chr10	3696230	3697785	45.0146	1.19745	0.40729	2.94004	0.00328172	0.00860791
1258	chr2	165947378	165950955	107.455	0.873159	0.297281	2.93715	0.00331248	0.00867861
10	chr1	119233655	119235352	47.4965	1.15998	0.395738	2.93118	0.00337673	0.00882668
891	chr16	16599061	16601870	96.525	-0.906696	0.309325	-2.93121	0.00337644	0.00882668
1288	chr2	170152589	170155113	241.164	0.729744	0.24954	2.92436	0.00345166	0.00901223
1807	chr6	16523373	16526561	50.0728	1.2113	0.414422	2.92288	0.00346815	0.00904493
526	chr12	65258096	65259775	20.1962	1.54756	0.530027	2.91979	0.00350272	0.00912466
1186	chr19	53273343	53274751	177.18	0.756839	0.259264	2.91918	0.00350951	0.00913182
2177	chr9	32904701	32908310	85.2356	0.983288	0.336882	2.91879	0.00351388	0.00913182
1715	chr5	53469805	53471589	27.4912	1.40474	0.481327	2.91848	0.00351747	0.00913182
2021	chr8	115551587	115556407	60.6104	1.10672	0.379402	2.91702	0.00353396	0.0091642
1577	chr4	148746373	148747507	20.6792	1.51973	0.521257	2.91551	0.00355108	0.00919815
1524	chr4	105703080	105704361	64.8955	1.15912	0.397928	2.91288	0.00358108	0.00926534
1193	chr19	61137467	61141797	620.536	0.603658	0.207314	2.91181	0.00359338	0.00928662
1070	chr18	3665505	3667298	37.3928	1.25964	0.432664	2.91137	0.00359852	0.0092894
1029	chr17	83287679	83289034	54.0842	1.10496	0.379671	2.91031	0.00361066	0.00931021
102	chr1	184330530	184331636	42.0892	1.21899	0.418965	2.90954	0.00361965	0.00932284
592	chr13	112759103	112761710	124.627	0.825691	0.284158	2.90574	0.0036638	0.00942022
248	chr10	37231418	37233243	249.085	0.697346	0.240002	2.90558	0.00366571	0.00942022
1177	chr19	4066961	4070049	465.186	-0.699077	0.240707	-2.90426	0.00368118	0.00944932
1597	chr4	32237196	32283117	2190.45	-0.508074	0.17497	-2.90377	0.00368694	0.00945347
259	chr10	44598424	44609123	233.341	0.723179	0.249117	2.90296	0.00369648	0.0094673
2196	chr9	44579334	44580919	105.669	0.87071	0.300073	2.90166	0.00371187	0.00948544
1035	chr17	84026989	84028952	41.8856	1.19411	0.411492	2.9019	0.00370908	0.00948544
857	chr15	81521425	81524885	1879.34	0.571684	0.197043	2.90131	0.00371606	0.00948552
1045	chr17	86704150	86712956	542.894	-0.763123	0.263332	-2.89795	0.00375607	0.00956624
71	chr1	164897849	164900234	59.769	-1.06556	0.367662	-2.89821	0.00375299	0.00956624
754	chr14	47464722	47466379	74.0964	0.999318	0.344885	2.89754	0.00376102	0.00956818
2172	chr9	32590821	32593529	62.2882	1.04621	0.361474	2.89429	0.00380016	0.00965697
1977	chr7	71288470	71290780	52.3761	1.11266	0.384631	2.89278	0.00381843	0.0096926
540	chr12	77176804	77178730	30.6298	1.32404	0.458081	2.89041	0.0038474	0.00975531
1358	chr2	58709740	58713142	92.4087	-0.913591	0.316651	-2.88516	0.00391209	0.00990831
205	chr10	118810421	118812621	141.002	0.792635	0.274823	2.88417	0.00392451	0.00992875
712	chr14	100457819	100460547	67.7352	-1.0319	0.358732	-2.87653	0.00402077	0.010161
607	chr13	36647619	36649487	24.4292	-1.42903	0.497001	-2.8753	0.00403642	0.0101893
882	chr15	97174583	97176861	92.3341	0.913725	0.318193	2.87161	0.00408388	0.0102977
431	chr11	76854089	76856147	117.758	-0.90772	0.316159	-2.87109	0.00409061	0.0103033
1912	chr7	128056428	128057947	48.8037	-1.13874	0.396868	-2.86932	0.00411361	0.0103307
250	chr10	37396983	37398595	82.7255	0.935162	0.325876	2.86968	0.00410882	0.0103307
1399	chr3	101504787	101508748	193.434	-0.755372	0.263269	-2.8692	0.00411507	0.0103307
1955	chr7	47015273	47016059	24.9782	1.39943	0.488959	2.86206	0.00420901	0.0105549
1481	chr3	57342548	57345269	139.254	-0.825181	0.288439	-2.86085	0.00422508	0.010572
982	chr17	29454787	29460492	156.408	0.781662	0.273216	2.86096	0.00422354	0.010572
180	chr1	86496981	86505735	980.214	0.536224	0.18757	2.85879	0.00425255	0.010629
1303	chr2	180438886	180442867	38.6289	-1.2516	0.438348	-2.85526	0.00430012	0.0107362
126	chr1	31031020	31033101	39.9208	-1.21881	0.426927	-2.85483	0.00430596	0.010739
1902	chr7	122803606	122805051	52.4102	1.08761	0.38112	2.85373	0.00432098	0.0107647
1354	chr2	45276257	45278985	103.166	0.920607	0.322704	2.85279	0.00433366	0.0107728
1412	chr3	115765447	115768683	69.8799	0.987573	0.346168	2.85288	0.00433256	0.0107728
276	chr10	66907723	66911303	74.1021	0.965574	0.339083	2.8476	0.00440502	0.0109382
512	chr12	39950127	39951614	58.6542	-1.09429	0.384494	-2.84607	0.00442631	0.0109792
2049	chr8	126803059	126811207	1142.35	-0.562473	0.197926	-2.84183	0.0044855	0.0111139
1174	chr19	38480678	38489621	266.432	-0.696948	0.245282	-2.84142	0.00449137	0.0111164
2178	chr9	32925469	32927373	41.126	1.16935	0.412032	2.83801	0.00453956	0.0112235
375	chr11	20913753	20915669	69.3398	0.97963	0.345577	2.83477	0.00458588	0.0113257
1021	chr17	79937824	79939314	39.5936	-1.22875	0.43357	-2.83404	0.00459636	0.0113393
19	chr1	130512247	130516629	100.948	0.871072	0.30753	2.83248	0.0046189	0.0113827
1774	chr6	122808764	122812585	1367.28	0.53097	0.187535	2.83131	0.00463573	0.0114118
2194	chr9	44550613	44554868	103.664	0.858421	0.303321	2.83007	0.00465373	0.0114438
12	chr1	119246383	119250419	89.6492	-0.956718	0.338169	-2.82911	0.0046677	0.0114658
937	chr16	85304730	85306002	43.7562	1.19395	0.422473	2.82609	0.004712	0.0115621
1267	chr2	167253600	167255254	90.0293	0.910647	0.322553	2.82325	0.00475396	0.0116526
2168	chr9	31995707	31998229	45.7242	-1.20396	0.42679	-2.82096	0.00478796	0.0117233
1301	chr2	174636256	174639912	49.6065	1.12246	0.398005	2.82022	0.00479915	0.0117381
534	chr12	70148026	70148733	19.0727	1.53068	0.542944	2.81922	0.00481403	0.0117619
104	chr1	184440528	184442986	25.5755	1.37362	0.487918	2.81526	0.00487376	0.0118951
1844	chr6	70719919	70722722	63.0663	-1.02641	0.364894	-2.81291	0.00490959	0.0119698
11	chr1	119237246	119239745	31.3988	1.27879	0.454867	2.81134	0.0049335	0.0120152
1708	chr5	36711068	36713910	681.196	0.752169	0.267704	2.80971	0.00495868	0.0120636
23	chr1	133451803	133453142	38.7108	1.18539	0.421977	2.80912	0.00496767	0.0120727
2153	chr9	122108879	122111055	71.7775	1.05248	0.375168	2.80535	0.00502623	0.012202
1462	chr3	36853583	36855139	104.644	0.850927	0.303635	2.80247	0.00507136	0.0122984
1891	chr7	106236102	106237398	50.2722	1.1115	0.397119	2.79891	0.00512752	0.0124214
339	chr10	98743683	98744907	91.7265	0.894533	0.319742	2.79767	0.00514725	0.012456
643	chr13	45474101	45476431	40.4216	1.19329	0.427741	2.78975	0.00527483	0.0127512
2276	chrX	73479052	73481326	64.4305	1.04408	0.374616	2.78707	0.00531866	0.0128436
328	chr10	95816921	95819321	151.705	-0.785864	0.282015	-2.7866	0.0053264	0.0128487
788	chr14	76810967	76821653	194.846	-0.729474	0.261924	-2.78507	0.00535168	0.012896
892	chr16	18686341	18687849	119.784	-0.861921	0.309745	-2.78268	0.00539126	0.0129777
898	chr16	19245334	19247744	33.2171	1.2529	0.450306	2.78233	0.00539708	0.012978
566	chr12	86887089	86900712	3317.73	0.540271	0.194277	2.78092	0.00542044	0.0130205
846	chr15	75856444	75858037	152.993	0.787588	0.283572	2.77738	0.00547982	0.0131469
908	chr16	24220584	24224395	81.0585	-1.07207	0.386037	-2.7771	0.00548458	0.0131469
1588	chr4	150913058	150915883	1359.84	0.529742	0.191203	2.77057	0.00559586	0.0133995
1932	chr7	19326644	19327519	71.9488	0.967199	0.34972	2.76564	0.00568119	0.0135896
2226	chr9	77748889	77752239	446.096	0.678402	0.245394	2.76454	0.00570033	0.0136211
890	chr16	15084432	15086118	31.3054	1.28603	0.465346	2.7636	0.00571675	0.013646
597	chr13	12369265	12370597	21.6635	1.44029	0.521381	2.76245	0.00573696	0.01368
358	chr11	110548734	110553018	123.71	0.795592	0.288419	2.75846	0.00580749	0.0138337
1107	chr18	61447727	61449674	94.7424	0.855652	0.310607	2.75477	0.00587334	0.0139614
1534	chr4	11101688	11104988	50.7975	-1.19456	0.433599	-2.75498	0.00586953	0.0139614
1501	chr3	85194677	85202501	379.725	0.608997	0.221319	2.75167	0.00592924	0.0140796
2234	chr9	90274197	90277074	191.978	0.686234	0.249482	2.75063	0.00594799	0.0141095
1748	chr5	9046858	9049419	92.4413	-0.916451	0.333519	-2.74782	0.00599925	0.0142163
590	chr13	112432591	112434222	21.1013	1.40899	0.512904	2.74709	0.00601273	0.0142335
1208	chr2	115519805	115521047	82.4525	-0.909121	0.331315	-2.74398	0.00606989	0.0143539
1353	chr2	45245856	45247616	140.692	0.753152	0.27496	2.73913	0.00616021	0.0145524
247	chr10	37193433	37196115	89.5116	0.885244	0.32479	2.72559	0.00641869	0.0151473
2053	chr8	126871042	126877968	296.535	-0.628812	0.23074	-2.72519	0.00642637	0.0151498
728	chr14	14632598	14633828	58.9194	1.00323	0.36829	2.72402	0.00644922	0.0151783
1355	chr2	46440967	46444719	70.4655	0.938926	0.3447	2.72389	0.00645179	0.0151783
360	chr11	115070966	115072399	53.2381	1.02771	0.377662	2.72123	0.00650395	0.0152838
475	chr12	112098259	112101663	43.6104	-1.13271	0.416295	-2.72092	0.00651	0.0152838
1982	chr7	71872186	71873611	34.7266	1.19098	0.438413	2.71656	0.00659635	0.0154706
1711	chr5	43807754	43808772	140.893	0.756728	0.278841	2.71384	0.00665087	0.0155824
1848	chr6	70823835	70825916	226.486	0.710634	0.261925	2.71312	0.0066653	0.0155853
889	chr16	13204500	13206943	86.6697	-0.874406	0.322291	-2.7131	0.00666576	0.0155853
1521	chr4	105312052	105314725	70.7202	0.924679	0.341045	2.71131	0.00670172	0.0156374
1861	chr6	81987185	81988363	47.7219	-1.09738	0.404738	-2.71135	0.00670102	0.0156374
1403	chr3	102676488	102680154	71.9949	-0.938129	0.346092	-2.71064	0.00671543	0.0156533
1905	chr7	122939785	122941068	65.0378	0.971221	0.358717	2.70749	0.00677948	0.0157865
1635	chr4	95160196	95162723	711.477	0.571905	0.211277	2.70689	0.0067916	0.0157986
1938	chr7	30392376	30395228	145.422	0.756129	0.279489	2.7054	0.0068222	0.0158536
387	chr11	26640020	26641360	116.396	0.788128	0.291595	2.70282	0.00687537	0.0159391
562	chr12	86810373	86811536	47.2217	1.05938	0.391979	2.70264	0.0068792	0.0159391
1375	chr2	72907817	72909493	26.7692	1.33151	0.492679	2.7026	0.00687995	0.0159391
1765	chr6	100414832	100416700	39.7334	1.13144	0.419386	2.69786	0.00697877	0.0161517
1560	chr4	133461323	133463945	87.9841	0.873137	0.323688	2.69746	0.00698705	0.0161545
667	chr13	5801748	5805541	174.641	0.751667	0.279107	2.69311	0.0070788	0.01635
1099	chr18	55548112	55549361	27.0397	1.27608	0.474242	2.69078	0.00712855	0.0164483
770	chr14	65342709	65345471	379.832	0.679059	0.25275	2.68668	0.00721655	0.0166345
1832	chr6	51168648	51170698	198.4	0.680159	0.253429	2.68382	0.00727857	0.0167605
1347	chr2	37697545	37704511	358.045	-0.581164	0.21665	-2.6825	0.00730746	0.0168101
1488	chr3	61415006	61416885	61.8421	0.974142	0.363787	2.67778	0.00741109	0.0170142
1379	chr2	75773359	75774359	22.0655	1.37467	0.513336	2.67791	0.00740829	0.0170142
1302	chr2	178609621	178611826	80.5052	-0.987664	0.369172	-2.67535	0.00746512	0.017121
1920	chr7	141024501	141026201	82.0515	0.870574	0.325457	2.67493	0.00747453	0.0171254
174	chr1	73199412	73201071	51.9347	1.02717	0.384671	2.67025	0.00757938	0.0173398
1925	chr7	142392514	142396568	96.2756	0.854678	0.320095	2.67008	0.00758332	0.0173398
961	chr16	95769131	95770289	56.8851	-0.988586	0.370315	-2.66958	0.00759456	0.0173481
184	chr1	88635189	88636671	32.2047	1.22549	0.459271	2.66833	0.00762298	0.0173956
1004	chr17	48041165	48049096	487.413	-0.557015	0.208809	-2.66758	0.00763994	0.0174169
819	chr15	54961914	54974956	286.366	-0.605243	0.227089	-2.66523	0.00769364	0.0175218
1284	chr2	169007935	169012845	134.352	0.773785	0.290392	2.66463	0.0077074	0.0175357
1565	chr4	133909859	133911659	511.488	0.582174	0.218826	2.66044	0.00780376	0.0177372
1550	chr4	129381747	129388736	101.399	0.820605	0.308598	2.65914	0.00783399	0.0177882
957	chr16	94323187	94324339	47.6229	1.0387	0.390945	2.65689	0.00788644	0.0178895
1722	chr5	64675650	64677926	69.6696	0.919027	0.346043	2.65582	0.00791165	0.0179289
237	chr10	23710506	23712477	50.4412	-1.03154	0.388651	-2.65415	0.00795089	0.0179999
1260	chr2	165967338	165970393	85.9563	0.882226	0.332464	2.6536	0.00796387	0.0180114
1339	chr2	32509163	32510892	61.074	0.960799	0.3624	2.65121	0.00802033	0.0181212
1673	chr5	140595431	140598364	77.8533	0.884277	0.333812	2.64903	0.00807233	0.0182206
46	chr1	151039712	151041648	304.862	0.714238	0.26997	2.64562	0.00815419	0.0183872
901	chr16	21332330	21334559	453.993	0.58523	0.221284	2.6447	0.00817622	0.0184187
1845	chr6	70724691	70730266	422.549	-0.556047	0.210421	-2.64255	0.00822849	0.0185182
30	chr1	134097355	134100638	894.098	0.540047	0.204476	2.64113	0.00826311	0.0185777
539	chr12	77059928	77061076	55.1187	0.995745	0.377147	2.6402	0.00828567	0.0186101
2088	chr8	4674794	4679291	1240.4	0.481384	0.182636	2.63576	0.00839483	0.0188368
791	chr14	76855973	76857757	25.0253	1.27963	0.485995	2.63301	0.00846319	0.0189715
958	chr16	94535529	94538455	176.093	0.829546	0.315412	2.63004	0.00853753	0.0191026
1295	chr2	170293983	170295636	50.3724	1.03353	0.392976	2.63	0.00853841	0.0191026
288	chr10	7297504	7299472	25.9162	1.26265	0.481023	2.62494	0.00866652	0.0193702
183	chr1	88586691	88588445	95.5214	0.813378	0.309941	2.6243	0.00868268	0.0193874
1842	chr6	5508829	5510265	41.8839	1.09383	0.416919	2.62361	0.00870032	0.0194078
1266	chr2	166785978	166787464	33.1786	1.19957	0.457472	2.62217	0.00873731	0.0194712
1241	chr2	156189823	156191227	83.7235	0.861344	0.328966	2.61834	0.00883588	0.0196717
2133	chr9	102689335	102690729	36.6366	1.11939	0.428131	2.61461	0.00893305	0.0198686
1201	chr19	9924334	9925488	57.1135	-0.979254	0.37494	-2.61176	0.00900775	0.0199964
151	chr1	60660734	60663159	168.689	-0.679577	0.260233	-2.61142	0.0090168	0.0199964
1126	chr18	82867370	82868903	61.5548	0.966071	0.369934	2.61147	0.00901546	0.0199964
714	chr14	100752303	100754163	47.2385	1.05878	0.405768	2.60933	0.0090719	0.0200678
2018	chr8	11168448	11172857	221.935	-0.634347	0.243119	-2.6092	0.00907536	0.0200678
976	chr17	26875569	26885929	166.181	0.712822	0.273187	2.60928	0.00907321	0.0200678
2252	chrX	12280932	12290314	561.056	0.553856	0.212335	2.6084	0.00909657	0.0200952
1389	chr2	91080058	91081774	110.856	0.825487	0.316758	2.60605	0.0091593	0.0202142
1332	chr2	30749476	30750873	42.4726	1.08772	0.417587	2.60477	0.00919354	0.0202702
1228	chr2	129337684	129339188	75.4721	0.867048	0.33298	2.6039	0.00921689	0.0203021
192	chr10	111159397	111160761	30.9226	1.18425	0.45525	2.60132	0.00928669	0.0204164
1645	chr5	106321222	106322161	28.6703	-1.2499	0.480465	-2.60145	0.00928307	0.0204164
1594	chr4	24965811	24967046	44.5887	1.12195	0.431625	2.59937	0.00933942	0.0205126
2257	chrX	134640071	134641977	32.8521	1.15733	0.445592	2.59728	0.00939642	0.0206179
1630	chr4	8910696	8914156	536.117	0.526237	0.202912	2.59343	0.0095024	0.0208304
2191	chr9	4266334	4269959	74.7461	-0.881101	0.339834	-2.59274	0.00952149	0.0208523
301	chr10	82177449	82179691	505.66	0.53321	0.205877	2.58995	0.00959905	0.0210019
395	chr11	34767534	34784584	626.705	0.508046	0.196271	2.58849	0.00963964	0.0210504
1883	chr7	100149923	100151156	58.2627	0.960923	0.371196	2.58872	0.0096334	0.0210504
1209	chr2	116942038	116943774	82.8217	0.847403	0.327695	2.58595	0.00971112	0.0211862
1250	chr2	163201730	163205498	75.8525	0.867792	0.335702	2.58501	0.00973758	0.0212237
1555	chr4	132801188	132803232	126.04	0.85181	0.32961	2.5843	0.00975771	0.0212472
2106	chr8	68953074	68955421	1299.41	-0.578103	0.223861	-2.58242	0.00981102	0.0213429
1851	chr6	72054708	72061125	1044.91	-0.503432	0.19548	-2.57536	0.0100135	0.0217627
839	chr15	73503723	73505197	32.7451	1.16564	0.453388	2.57095	0.0101419	0.0220208
2231	chr9	83447487	83448238	61.8035	0.924877	0.359806	2.57048	0.0101556	0.0220296
1950	chr7	37019566	37021083	38.3373	1.08864	0.423626	2.56983	0.0101749	0.0220296
636	chr13	43912734	43914885	29.0637	1.19136	0.463546	2.5701	0.0101669	0.0220296
1013	chr17	6826566	6829649	335.093	0.61864	0.240796	2.56914	0.010195	0.0220521
1974	chr7	71092902	71094600	65.9917	0.914627	0.356056	2.56877	0.0102059	0.0220549
2256	chrX	13460960	13462968	165.547	0.678196	0.264157	2.5674	0.0102464	0.0221214
2278	chrX	95964190	95969800	328.837	-0.593668	0.231507	-2.56436	0.0103365	0.0222738
1643	chr5	105649175	105655113	194.413	0.652709	0.254507	2.56461	0.0103293	0.0222738
766	chr14	63091828	63106180	644.006	0.517125	0.201743	2.56328	0.0103688	0.0223065
1298	chr2	173351537	173353363	59.0289	0.990195	0.386312	2.5632	0.0103712	0.0223065
689	chr13	74561510	74565162	271.393	0.613626	0.239576	2.5613	0.0104282	0.0224079
1131	chr18	8719421	8721625	52.5102	-0.990189	0.387236	-2.55707	0.0105559	0.0226609
794	chr14	86337474	86341227	144.307	0.693262	0.27129	2.55542	0.0106058	0.0227467
2017	chr8	111525992	111530900	110.439	0.75341	0.295539	2.54928	0.0107947	0.0231226
775	chr14	69822442	69825400	115.922	0.797634	0.312913	2.54906	0.0108014	0.0231226
563	chr12	86814119	86818386	64.6204	0.904073	0.354746	2.5485	0.0108186	0.0231378
1188	chr19	55244174	55245946	31.184	1.17684	0.461905	2.54779	0.0108408	0.0231637
486	chr12	16875072	16876641	34.7533	1.12607	0.442786	2.54316	0.0109856	0.0234511
159	chr1	64294637	64296277	36.1841	1.09049	0.429134	2.54114	0.0110491	0.0235645
1939	chr7	3275363	3276867	28.7005	1.19104	0.468899	2.54008	0.0110826	0.023614
779	chr14	73130083	73138206	316.201	0.574478	0.226536	2.53592	0.0112152	0.0238741
314	chr10	93123058	93124880	75.3096	0.850613	0.335598	2.53462	0.011257	0.0239407
300	chr10	82082603	82084279	72.1625	0.857472	0.33883	2.53068	0.011384	0.0241884
1554	chr4	129881139	129884601	187.937	0.663391	0.262191	2.53018	0.0114004	0.0242006
2095	chr8	46974990	46977475	107.631	0.789823	0.312375	2.52844	0.0114569	0.0242612
1868	chr6	87875547	87877163	45.0232	1.04116	0.4118	2.52832	0.0114608	0.0242612
1464	chr3	37768023	37770515	38.8901	1.05988	0.419101	2.52893	0.0114411	0.0242612
2241	chr9	96397986	96399923	66.5805	0.903528	0.357802	2.52522	0.0115625	0.0244538
859	chr15	81567642	81568999	47.1666	1.00208	0.397157	2.52312	0.0116318	0.0245776
430	chr11	76628115	76629274	84.6771	0.839216	0.332675	2.52263	0.011648	0.024589
822	chr15	58591061	58596276	279.288	0.649628	0.257563	2.52221	0.0116621	0.0245959
1978	chr7	71307471	71308999	44.5802	1.06459	0.422509	2.51969	0.0117457	0.0247496
1763	chr5	99905545	99907108	132.898	0.755005	0.30009	2.51593	0.011872	0.0249926
44	chr1	151024751	151026161	195.346	0.625723	0.24879	2.51507	0.0119009	0.0250303
1510	chr3	97617394	97619179	62.1821	-0.942227	0.375557	-2.50888	0.0121115	0.0254499
1001	chr17	47954022	47955897	36.0806	-1.16538	0.465677	-2.50255	0.0123301	0.0258852
1843	chr6	67101935	67103583	24.4177	1.21956	0.488613	2.49597	0.0125613	0.0263464
363	chr11	120315811	120317503	1626.57	0.572305	0.229439	2.49436	0.0126183	0.0264417
1103	chr18	5944433	5946101	37.1362	1.06795	0.428356	2.49314	0.0126617	0.0265083
181	chr1	86632790	86634053	19.4828	-1.33009	0.533874	-2.49138	0.0127246	0.0266156
633	chr13	43350142	43351682	49.312	0.984319	0.395572	2.48834	0.012834	0.0267953
925	chr16	45008559	45010846	34.1899	1.11069	0.446347	2.48841	0.0128317	0.0267953
1915	chr7	138537475	138539512	26.5581	-1.23498	0.496845	-2.48564	0.0129321	0.0269542
931	chr16	49838955	49841466	177.135	0.635805	0.255797	2.48559	0.0129338	0.0269542
655	chr13	52061371	52062277	49.9756	0.965105	0.388352	2.48513	0.0129504	0.0269642
1297	chr2	170321168	170324770	150.391	0.677419	0.272873	2.48254	0.0130449	0.0271363
1440	chr3	148998200	148999884	41.2709	1.06232	0.42833	2.48014	0.013133	0.0272946
666	chr13	5713736	5715255	42.2646	1.07499	0.433571	2.47938	0.0131611	0.0273281
827	chr15	60105524	60113074	84.1862	0.822056	0.33168	2.47846	0.013195	0.0273736
1343	chr2	35495227	35496894	106.051	0.736483	0.297224	2.47787	0.013217	0.0273943
2094	chr8	46940700	46943015	66.4669	0.890939	0.359813	2.47612	0.013282	0.0274791
855	chr15	81510950	81512740	97.834	0.757321	0.305831	2.47627	0.0132762	0.0274791
2044	chr8	126614743	126616747	78.3909	0.838878	0.338843	2.47571	0.0132972	0.0274856
1264	chr2	166180161	166182205	67.9641	0.886085	0.358279	2.47317	0.0133919	0.0276565
113	chr1	191443233	191447101	415.324	-0.593981	0.240495	-2.46983	0.0135177	0.0278909
926	chr16	45089287	45091065	33.1843	1.12036	0.453867	2.46848	0.013569	0.0279715
1472	chr3	51652289	51653730	155.852	0.657992	0.266991	2.46448	0.0137213	0.0282083
860	chr15	82416457	82417997	42.7486	1.01763	0.412971	2.46416	0.0137333	0.0282083
1495	chr3	83001761	83004015	63.973	0.90037	0.365376	2.46423	0.0137308	0.0282083
834	chr15	6564373	6568667	198.707	0.634501	0.257429	2.46476	0.0137106	0.0282083
790	chr14	76834038	76838394	90.5525	-0.795163	0.322787	-2.46343	0.0137616	0.0282409
594	chr13	113422903	113424581	72.2531	0.833831	0.338626	2.46239	0.0138013	0.028297
1092	chr18	4920643	4984566	2243.58	-0.443809	0.180273	-2.46187	0.0138216	0.0283132
549	chr12	80974782	80977391	106.972	-0.741632	0.301421	-2.46046	0.0138761	0.0283993
972	chr17	22739093	22740263	45.4085	1.00073	0.407397	2.45641	0.0140334	0.0286955
715	chr14	102806224	102807305	37.8982	1.10128	0.44849	2.45552	0.014068	0.0287405
1395	chr2	94169038	94179184	1293.63	-0.469637	0.191348	-2.45436	0.0141137	0.0288082
1057	chr18	21373103	21374913	156.511	0.69698	0.284046	2.45376	0.0141371	0.02883
1411	chr3	115640698	115643461	244.085	0.616759	0.251426	2.45305	0.0141653	0.0288392
1967	chr7	67443843	67446827	144.406	0.690524	0.281501	2.45301	0.0141668	0.0288392
1144	chr19	21736234	21739190	74.8421	0.873404	0.356496	2.44997	0.0142869	0.0290576
921	chr16	37683550	37685689	32.6492	1.09907	0.448694	2.44948	0.0143064	0.0290715
390	chr11	3103891	3107290	92.2955	0.800059	0.326979	2.44682	0.0144122	0.0292604
365	chr11	16741552	16743411	28.7665	-1.15041	0.47051	-2.44502	0.0144844	0.0293808
743	chr14	31929853	31931236	79.7333	0.807865	0.330601	2.44363	0.0145405	0.0294684
513	chr12	41023677	41031129	431.05	-0.547197	0.224014	-2.4427	0.014578	0.0295181
924	chr16	44049135	44063745	539.703	-0.495684	0.203215	-2.43921	0.0147196	0.0297784
1226	chr2	128210814	128211760	41.2079	1.00694	0.412923	2.43856	0.0147459	0.0298038
1656	chr5	114698903	114700657	182.456	0.632477	0.259397	2.43826	0.0147582	0.0298038
602	chr13	31529988	31532270	37.5386	-1.05856	0.43467	-2.43532	0.0148787	0.0300206
647	chr13	48548972	48553315	160.752	0.649445	0.266713	2.43499	0.014892	0.0300209
138	chr1	45857632	45862703	329.524	0.558295	0.229716	2.43037	0.0150833	0.0303795
1368	chr2	67880969	67884119	84.8402	-0.878639	0.361944	-2.42756	0.0152009	0.0305894
461	chr11	97647897	97648250	120.831	-0.706948	0.291514	-2.42509	0.0153044	0.0307591
870	chr15	8715558	8717365	104.448	0.784237	0.323409	2.42491	0.0153122	0.0307591
2240	chr9	94645151	94646367	36.6426	1.03844	0.428381	2.42411	0.0153458	0.0307996
1768	chr6	115342618	115345074	99.8766	0.795457	0.328521	2.42133	0.0154639	0.0310093
1634	chr4	95153248	95155619	39.786	1.03434	0.427339	2.42041	0.015503	0.0310604
119	chr1	194879495	194880217	100.907	0.753213	0.311338	2.41928	0.0155513	0.0310964
1531	chr4	10923250	10924993	50.8948	0.948575	0.392054	2.4195	0.0155419	0.0310964
1169	chr19	36799099	36803838	120.128	-0.716043	0.296004	-2.41903	0.0155618	0.0310964
1245	chr2	160240113	160269236	814.723	-0.505586	0.209243	-2.41626	0.0156807	0.0313064
1700	chr5	22572374	22575216	76.4488	-0.810616	0.335569	-2.41565	0.0157073	0.0313323
6	chr1	119162491	119165422	31.606	-1.10855	0.459118	-2.41452	0.0157559	0.0314018
105	chr1	184747750	184750245	47.282	0.953764	0.395117	2.41388	0.0157838	0.0314299
78	chr1	172455216	172456666	41.3595	1.00015	0.414563	2.41255	0.0158415	0.0315173
525	chr12	58537949	58539246	34.3174	1.06161	0.440549	2.40973	0.0159642	0.031706
970	chr17	17293559	17295227	110.671	0.715216	0.296795	2.4098	0.0159614	0.031706
1373	chr2	71670428	71671499	24.5158	1.18734	0.493265	2.4071	0.0160796	0.0319076
1149	chr19	21912293	21916365	210.95	0.587875	0.244511	2.40429	0.0162038	0.032126
621	chr13	37731712	37733322	26.8605	-1.20703	0.502609	-2.40154	0.0163264	0.032341
1752	chr5	92089247	92091871	32.4933	-1.07397	0.44759	-2.39945	0.0164199	0.032498
361	chr11	118362490	118364409	42.1016	1.06229	0.442798	2.39904	0.0164379	0.0325055
111	chr1	191268083	191270106	29.7723	1.13478	0.473078	2.39873	0.0164522	0.0325055
1667	chr5	124536433	124537761	54.0221	0.910608	0.379988	2.39641	0.0165564	0.0326831
1515	chr3	98915598	98918099	52.7693	-0.907305	0.378724	-2.39569	0.0165892	0.0327195
145	chr1	60570806	60572912	19.1527	-1.33876	0.559054	-2.3947	0.0166341	0.0327799
802	chr15	27702059	27703841	41.6984	1.00381	0.419388	2.39351	0.0166879	0.0328574
1523	chr4	105556531	105558377	26.6332	1.15208	0.481703	2.39168	0.0167716	0.0329937
299	chr10	8132841	8134413	21.749	-1.23572	0.516805	-2.39108	0.0167988	0.0330189
904	chr16	23415719	23417411	35.2784	1.04289	0.436287	2.39038	0.0168309	0.0330194
1893	chr7	106643430	106645237	49.5817	0.955838	0.399911	2.39013	0.0168425	0.0330194
17	chr1	125440938	125442979	163.58	0.655454	0.27417	2.39069	0.0168168	0.0330194
639	chr13	44064940	44067056	104.025	0.720647	0.301677	2.38881	0.0169033	0.0331101
2076	chr8	4404137	4405960	45.524	0.982035	0.411941	2.38392	0.0171294	0.0335242
900	chr16	21310657	21311536	47.0168	0.942436	0.395402	2.38349	0.0171493	0.0335345
1219	chr2	12052794	12055065	43.825	0.956318	0.401307	2.38301	0.0171718	0.0335496
2239	chr9	94614243	94616239	25.0317	1.15131	0.483612	2.38065	0.0172823	0.0337368
1664	chr5	123057137	123059629	294.941	0.561026	0.235738	2.37987	0.0173186	0.0337786
1619	chr4	59290737	59293251	59.1742	0.867196	0.364814	2.37709	0.0174498	0.033986
2269	chrX	36228848	36229390	16.2001	1.31345	0.552568	2.37699	0.0174547	0.033986
150	chr1	60655806	60657829	47.6619	0.967053	0.406969	2.37623	0.0174903	0.0340264
1408	chr3	104599070	104601138	124.332	-0.70432	0.296489	-2.37554	0.0175235	0.0340618
1382	chr2	79086953	79088543	47.8705	0.943719	0.397379	2.37486	0.0175557	0.0340954
2195	chr9	44567399	44568857	78.1852	0.789547	0.333104	2.37028	0.0177748	0.0344916
1198	chr19	8517056	8519334	178.774	0.693077	0.29297	2.36569	0.0179966	0.0348924
731	chr14	19984536	19987610	207.484	0.597318	0.252717	2.36358	0.0180992	0.0350615
1456	chr3	24782740	24784417	75.9024	-0.850139	0.35977	-2.36301	0.0181274	0.0350862
1239	chr2	153543398	153544967	32.1886	1.05242	0.445448	2.36261	0.0181465	0.0350935
1916	chr7	138918201	138920749	208.01	0.618871	0.262016	2.36196	0.0181785	0.0351005
271	chr10	60259400	60261767	34.7636	1.04554	0.442666	2.36191	0.0181809	0.0351005
2165	chr9	23040328	23042825	29.3842	1.1064	0.46883	2.35992	0.0182791	0.0352602
887	chr15	97589750	97592042	50.4726	0.94836	0.402174	2.35808	0.0183695	0.0354048
103	chr1	184356565	184359178	48.4526	0.911499	0.387053	2.35497	0.0185241	0.0356637
243	chr10	3632963	3635086	42.8113	0.978621	0.415594	2.35475	0.0185351	0.0356637
158	chr1	63436679	63439110	51.2071	0.907733	0.385752	2.35315	0.018615	0.0357873
370	chr11	20506180	20509238	93.8385	0.730858	0.310645	2.35272	0.0186369	0.0357992
49	chr1	151286784	151288477	94.4225	0.743729	0.316161	2.35238	0.0186539	0.0358016
1908	chr7	126805783	126810422	91.9998	0.736442	0.313549	2.34873	0.0188377	0.036124
382	chr11	22871481	22873913	105.866	0.69901	0.297724	2.34785	0.0188822	0.036172
1105	chr18	60726507	60765593	3741.89	0.40448	0.172295	2.34761	0.0188944	0.036172
1242	chr2	158159370	158160678	67.4266	0.85429	0.364133	2.34609	0.0189713	0.0362281
1009	chr17	50469898	50472090	165.863	0.615454	0.26228	2.34655	0.0189482	0.0362281
1879	chr6	94729291	94732205	49.7375	-0.91351	0.389372	-2.34611	0.0189704	0.0362281
2193	chr9	44536760	44541186	100.47	0.713472	0.304494	2.34314	0.0191222	0.0364856
1444	chr3	149303198	149304536	22.976	1.20652	0.515036	2.3426	0.0191499	0.0365081
1983	chr7	71960081	71962541	38.7038	0.981017	0.419731	2.33725	0.0194261	0.0369728
576	chr13	106759852	106761983	65.9603	0.814539	0.348475	2.33744	0.0194163	0.0369728
2181	chr9	33100437	33102770	42.9717	0.944422	0.404247	2.33625	0.0194783	0.0370103
1761	chr5	96982408	96983845	46.6369	0.958567	0.410261	2.33648	0.0194662	0.0370103
378	chr11	22436768	22439722	161.105	-0.697331	0.298547	-2.33575	0.0195041	0.0370286
508	chr12	3337797	3345891	275.326	0.563142	0.241249	2.33428	0.019581	0.0371437
947	chr16	91361429	91363979	75.1963	0.801832	0.345327	2.32195	0.0202358	0.0383221
1146	chr19	21885204	21887856	106.958	0.690134	0.297194	2.32216	0.0202241	0.0383221
2211	chr9	63030769	63034613	59.4121	-0.845005	0.364418	-2.31878	0.020407	0.0385919
262	chr10	4603998	4605696	46.9229	-0.948908	0.409244	-2.31869	0.0204121	0.0385919
2038	chr8	125568668	125571186	822.29	0.520621	0.225191	2.31191	0.0207829	0.0392604
2135	chr9	106262102	106264634	108.662	0.772428	0.334386	2.30999	0.0208888	0.0394279
886	chr15	97580811	97582965	56.7755	0.847519	0.367068	2.30889	0.0209496	0.0395099
1947	chr7	35166617	35179715	171.297	-0.620822	0.26892	-2.30857	0.0209672	0.0395105
290	chr10	78480913	78483192	277.875	0.526362	0.228042	2.30818	0.0209894	0.0395196
776	chr14	69829859	69832380	137.805	0.638549	0.276716	2.30759	0.0210218	0.039548
978	chr17	28506213	28507772	25.3589	1.12395	0.487158	2.30716	0.0210461	0.0395611
1828	chr6	3979152	3989782	368.269	-0.512468	0.222531	-2.30291	0.0212842	0.0399757
1014	chr17	69144143	69145225	128.33	0.718871	0.312248	2.30224	0.0213215	0.0400129
32	chr1	134555831	134557674	205.679	0.581023	0.252564	2.3005	0.02142	0.0401257
1413	chr3	115792820	115794214	40.8589	-0.965948	0.419835	-2.30078	0.021404	0.0401257
2075	chr8	41154404	41164769	113.339	0.742688	0.322917	2.29993	0.021452	0.0401257
909	chr16	24227653	24230384	76.9763	-0.817318	0.355358	-2.29999	0.021449	0.0401257
85	chr1	179649872	179651438	37.0039	0.986243	0.428908	2.29943	0.0214807	0.0401466
1696	chr5	150911631	150913586	41.9003	-1.00577	0.437588	-2.29845	0.021536	0.0402171
413	chr11	60044769	60047399	160.476	0.628918	0.273715	2.29771	0.0215784	0.0402633
1564	chr4	133812212	133817488	1685.14	0.410987	0.179138	2.29424	0.0217766	0.0405999
663	chr13	55189115	55191572	979.192	-0.497637	0.217064	-2.29258	0.0218721	0.0407446
721	chr14	103898397	103900113	21.9101	1.15749	0.505412	2.29018	0.0220107	0.0409394
319	chr10	94426172	94470376	1404.85	0.430474	0.187968	2.29015	0.0220125	0.0409394
1502	chr3	85546984	85551867	77.8164	-0.762939	0.333298	-2.28906	0.0220758	0.0410235
1352	chr2	45238235	45241024	83.6768	0.744318	0.325316	2.28799	0.0221382	0.041106
1956	chr7	47034514	47035837	29.6183	1.04766	0.45822	2.28636	0.0222332	0.0412489
782	chr14	75444939	75446558	60.3721	0.868874	0.380481	2.28362	0.0223939	0.0415133
1356	chr2	50813250	50815135	72.8601	0.789172	0.345699	2.28283	0.0224405	0.0415392
1171	chr19	3690802	3696995	183.211	-0.637883	0.279434	-2.28276	0.0224443	0.0415392
1336	chr2	32136703	32138807	295.866	0.562313	0.246445	2.2817	0.0225071	0.041564
760	chr14	58320513	58322100	61.5193	0.862619	0.378075	2.28161	0.0225123	0.041564
706	chr13	99006143	99007613	35.2915	0.989618	0.433667	2.28198	0.0224906	0.041564
681	chr13	62964014	62976096	649.28	0.453912	0.199384	2.27657	0.022812	0.0420833
1476	chr3	52501843	52503723	59.4133	-0.874216	0.384305	-2.2748	0.0229179	0.0422236
1642	chr5	105641520	105643718	94.8877	0.735137	0.323183	2.27468	0.0229251	0.0422236
813	chr15	37045064	37046511	31.2516	1.05566	0.46424	2.27394	0.0229694	0.0422711
186	chr1	93127305	93129355	39.5466	0.949771	0.418346	2.2703	0.0231894	0.0426416
841	chr15	74896529	74920390	1036.97	0.42115	0.185679	2.26816	0.0233192	0.0428457
1225	chr2	126531503	126547727	506.984	0.595924	0.262997	2.2659	0.0234577	0.0430655
529	chr12	69485208	69487230	23.6795	1.11766	0.493674	2.26397	0.0235762	0.0432484
47	chr1	151166653	151168736	60.7969	-0.887462	0.392089	-2.26342	0.0236097	0.043275
60	chr1	155058738	155060378	63.317	0.79751	0.352522	2.2623	0.023679	0.0433671
1350	chr2	45195618	45199360	206.062	0.589664	0.260685	2.26198	0.0236984	0.0433679
1300	chr2	174609474	174615139	114.695	0.704947	0.311962	2.25973	0.0238383	0.043589
1223	chr2	124740488	124742560	49.0624	0.876565	0.387998	2.2592	0.0238709	0.0436136
198	chr10	117898878	117904337	227.374	0.568513	0.251798	2.25782	0.0239571	0.0437361
371	chr11	20514409	20516541	122.314	0.648349	0.287457	2.25547	0.024104	0.0439692
1189	chr19	56277424	56279268	27.2552	-1.08719	0.482566	-2.25293	0.0242638	0.0441898
310	chr10	87709909	87714463	197.091	-0.598333	0.265578	-2.25295	0.0242625	0.0441898
2213	chr9	63089943	63092986	150.06	0.60111	0.267409	2.24791	0.0245821	0.0447339
1516	chr4	101288805	101294573	930.91	0.469848	0.209104	2.24696	0.0246428	0.0448087
480	chr12	12810259	12811383	23.233	-1.14077	0.508759	-2.24226	0.0249449	0.0453218
1273	chr2	167751443	167755358	85.0158	0.723268	0.322711	2.24123	0.0250115	0.0453719
1970	chr7	67911328	67911928	5.50311	1.44455	0.644539	2.24121	0.0250122	0.0453719
1402	chr3	102382062	102383527	18.0027	1.20263	0.536839	2.24021	0.025077	0.0454533
585	chr13	111935725	111937489	40.6326	0.956619	0.428129	2.23442	0.0254556	0.0461029
1829	chr6	41553182	41555729	34.7603	0.97486	0.436527	2.23322	0.0255346	0.0462094
1471	chr3	51331978	51342842	1176.92	0.416215	0.186549	2.23114	0.0256721	0.0464213
1846	chr6	70742714	70745505	47.1175	-0.879849	0.395361	-2.22543	0.0260523	0.0470715
498	chr12	25234128	25236154	80.4732	-0.789916	0.355555	-2.22164	0.0263075	0.0474951
1548	chr4	129034931	129036280	29.5411	1.02602	0.462077	2.22044	0.0263888	0.0475672
949	chr16	91451413	91453571	31.3884	1.00396	0.452145	2.22044	0.0263892	0.0475672
684	chr13	65239652	65243323	992.694	0.441068	0.198713	2.21962	0.0264446	0.0476294
1623	chr4	7143166	7145295	34.0835	-0.987611	0.445811	-2.21532	0.0267384	0.0480828
2102	chr8	64826059	64851289	1723.6	0.427906	0.193146	2.21545	0.026729	0.0480828
1704	chr5	3197853	3199197	20.8277	1.13833	0.514407	2.2129	0.0269046	0.0483436
1904	chr7	122873306	122874030	29.2433	1.01907	0.460721	2.21191	0.0269728	0.0484279
2163	chr9	23011014	23012743	65.6148	0.77904	0.352425	2.21051	0.0270695	0.0485634
547	chr12	80071634	80085832	411.052	0.476792	0.21583	2.20911	0.0271671	0.0487002
323	chr10	95680084	95689614	1495.24	-0.424732	0.192312	-2.20855	0.0272058	0.0487313
1493	chr3	79163546	79182298	1402.5	0.401899	0.182028	2.2079	0.0272512	0.0487743
516	chr12	51843697	51845813	422.472	0.517705	0.234726	2.20557	0.0274141	0.048989
213	chr10	125368666	125391457	553.117	0.448043	0.203141	2.20557	0.0274139	0.048989
596	chr13	117032946	117034535	42.4661	0.902767	0.409457	2.20479	0.0274686	0.0490479
42	chr1	143917067	143918765	212.584	0.555775	0.25217	2.20397	0.0275267	0.0491132
991	chr17	42910797	42916971	195.593	0.552862	0.251054	2.20216	0.0276539	0.0493017
919	chr16	33346189	33351014	134.516	0.616829	0.280293	2.20066	0.0277601	0.0494525
1236	chr2	145232727	145235227	51.7248	0.842314	0.383118	2.19858	0.027908	0.0496468
202	chr10	118084788	118086883	48.5436	0.87639	0.398629	2.19851	0.0279127	0.0496468
260	chr10	44629722	44641994	385.304	0.485559	0.221172	2.19539	0.0281356	0.0500043
671	chr13	59831419	59833781	267.67	0.613659	0.279661	2.1943	0.0282141	0.0501048
2126	chr8	8993558	8995795	69.2662	0.752367	0.343241	2.19195	0.0283832	0.0503658
100	chr1	184274192	184277661	79.1386	0.774363	0.353361	2.19142	0.0284212	0.050394
1653	chr5	113917958	113919997	135.832	0.696871	0.318092	2.19078	0.0284674	0.0504368
1685	chr5	146800487	146809676	811.992	0.428601	0.19598	2.18696	0.0287457	0.0508904
2251	chrX	12249689	12254831	122.072	-0.63933	0.292391	-2.18656	0.028775	0.0509027
2197	chr9	46324424	46329753	136.485	0.608406	0.278305	2.18611	0.0288074	0.0509207
825	chr15	59684703	59686530	30.1661	1.01399	0.464439	2.18325	0.0290174	0.0512124
1448	chr3	151297821	151299853	60.3183	0.842604	0.385937	2.18327	0.0290161	0.0512124
2175	chr9	32834715	32837279	27.9226	1.05171	0.482059	2.1817	0.0291316	0.0513743
48	chr1	151237374	151251674	563.68	0.466704	0.214107	2.17977	0.0292749	0.0515472
967	chr17	13658965	13659809	25.6376	1.05783	0.485285	2.1798	0.029272	0.0515472
1433	chr3	127122022	127125351	200.471	-0.540148	0.247952	-2.17844	0.0293734	0.0516621
1279	chr2	167822641	167824839	53.077	-0.82684	0.379584	-2.17828	0.0293854	0.0516621
974	chr17	26534454	26538843	180.902	0.552996	0.253907	2.17795	0.0294099	0.0516655
2170	chr9	32562036	32563486	27.902	1.03037	0.473491	2.17612	0.0295464	0.0518654
730	chr14	19712460	19714410	153.095	0.580067	0.267386	2.1694	0.0300521	0.0527125
1568	chr4	135282575	135283529	25.6469	1.04952	0.484428	2.16652	0.0302717	0.0530568
1052	chr17	88255617	88259155	197.581	0.586683	0.271019	2.16473	0.0304086	0.0532559
1143	chr19	21714143	21716154	50.239	0.861701	0.398475	2.16249	0.0305801	0.0535151
929	chr16	49798165	49799852	92.05	0.69175	0.320407	2.15897	0.0308522	0.05395
97	chr1	183552831	183554083	47.3214	0.86977	0.403202	2.15716	0.0309934	0.0541554
829	chr15	61351502	61352654	30.8211	0.975215	0.452333	2.15597	0.0310863	0.0542762
1309	chr2	23051951	23053347	34.4282	0.981727	0.45586	2.15357	0.031274	0.0545621
1994	chr7	83842237	83843705	21.9636	1.09325	0.507788	2.15297	0.0313208	0.054602
2100	chr8	61199799	61201454	19.2212	1.13873	0.529603	2.15016	0.0315426	0.0549468
149	chr1	60651607	60653403	78.3563	0.720885	0.335329	2.14979	0.0315722	0.0549564
5	chr1	105970265	105972975	406.494	0.469029	0.218231	2.14923	0.0316159	0.0549905
303	chr10	82773348	82779932	318.259	0.49907	0.232562	2.14596	0.031876	0.0554006
946	chr16	91351753	91359400	144.387	0.58793	0.274062	2.14525	0.0319331	0.0554577
1252	chr2	163928184	163929337	26.0109	1.02992	0.480381	2.14397	0.0320355	0.0555932
1042	chr17	84872029	84875333	256.731	-0.581855	0.271451	-2.1435	0.0320729	0.0556159
1551	chr4	129789487	129789766	26.3408	1.03602	0.483479	2.14285	0.0321248	0.0556635
535	chr12	70712926	70714732	27.0069	1.02895	0.481639	2.13636	0.03265	0.0565306
913	chr16	29813594	29814586	30.2412	0.989361	0.463249	2.1357	0.0327041	0.0565813
1418	chr3	118477713	118479292	26.5048	-1.01996	0.477735	-2.13498	0.0327624	0.0566392
1329	chr2	30699250	30701302	268.273	0.496273	0.233428	2.12602	0.0335016	0.0578734
1261	chr2	165975866	165977941	48.5168	0.823585	0.387706	2.12425	0.0336493	0.0580479
2132	chr9	101072353	101080044	2621.68	0.380167	0.17897	2.1242	0.0336536	0.0580479
381	chr11	22776758	22781670	68.0042	-0.74945	0.353513	-2.12001	0.0340053	0.0586104
964	chr16	98028929	98032645	53.8519	0.790418	0.372898	2.11966	0.0340347	0.0586167
1666	chr5	123313335	123315247	25.3678	-1.03806	0.490982	-2.11426	0.0344933	0.0593618
951	chr16	91460360	91477276	1090.63	0.390452	0.185031	2.11019	0.0348417	0.0599161
628	chr13	40850637	40856311	223.509	0.576839	0.273571	2.10856	0.0349828	0.0600682
156	chr1	60973518	60974801	72.2051	0.724397	0.343538	2.10864	0.0349759	0.0600682
837	chr15	7069516	7071435	37.0514	0.902959	0.428868	2.10545	0.0352524	0.0604856
1730	chr5	72183860	72185335	70.7144	0.715274	0.339921	2.10424	0.0353578	0.0606209
765	chr14	62244489	62247667	152.549	0.562008	0.267505	2.10092	0.0356479	0.0610725
1491	chr3	68675768	68677747	41.7565	-0.867943	0.413271	-2.10018	0.0357131	0.0610924
2121	chr8	86901469	86902575	30.5974	0.950948	0.452765	2.10031	0.0357015	0.0610924
120	chr1	195241512	195242103	3367.4	-0.920837	0.43904	-2.09739	0.0359592	0.0614674
609	chr13	37439350	37441880	37.8125	-0.887787	0.423664	-2.0955	0.0361267	0.0617074
1556	chr4	132943202	132948026	667.19	0.423603	0.202271	2.09423	0.0362392	0.061807
1788	chr6	140766640	140768588	68.922	0.742749	0.354646	2.09434	0.0362294	0.061807
1576	chr4	141733519	141737320	99.5994	0.651174	0.311233	2.09224	0.0364171	0.0620178
2085	chr8	46408382	46410589	79.925	-0.724737	0.346359	-2.09245	0.0363986	0.0620178
1812	chr6	24959091	24964493	94.9907	0.671688	0.321225	2.09102	0.0365265	0.0621577
1483	chr3	57695852	57697590	75.9067	-0.712863	0.341566	-2.08704	0.0368843	0.0627198
811	chr15	36831553	36832436	34.5285	0.929009	0.445364	2.08595	0.0369829	0.0628406
1084	chr18	39635311	39637349	92.7249	0.721777	0.346678	2.08198	0.037344	0.0634069
1277	chr2	167804026	167806763	226.716	0.502685	0.241638	2.08032	0.0374959	0.0636175
249	chr10	37235405	37237456	25.5537	0.997225	0.479536	2.07956	0.0375658	0.0636888
1663	chr5	122523940	122528569	375.562	-0.492586	0.237565	-2.07348	0.0381274	0.0645451
750	chr14	45666875	45668676	82.217	0.737673	0.355762	2.0735	0.0381257	0.0645451
1033	chr17	83861279	83863387	622.999	0.470195	0.226865	2.07257	0.0382119	0.0646401
253	chr10	40176599	40181835	146.157	-0.595861	0.287863	-2.06995	0.0384571	0.0650068
98	chr1	183978603	183981044	95.5291	0.642467	0.31044	2.06954	0.0384959	0.0650242
973	chr17	24006838	24008251	43.9445	0.908373	0.440055	2.06423	0.0389962	0.0657792
1119	chr18	7692699	7693746	109.797	0.608428	0.294755	2.06418	0.0390005	0.0657792
83	chr1	177982710	177983830	108.963	0.678332	0.328987	2.06188	0.039219	0.0660989
273	chr10	60273003	60274803	29.4735	0.941666	0.456804	2.06142	0.0392626	0.0661235
162	chr1	64373670	64376411	72.0135	0.712731	0.345816	2.06101	0.0393019	0.0661408
1624	chr4	73046833	73048829	98.7801	-0.682883	0.331469	-2.06017	0.0393822	0.0662271
803	chr15	28158373	28159960	33.3607	0.90364	0.439538	2.05589	0.0397935	0.0668696
2277	chrX	93888957	93890285	115.337	0.59248	0.289017	2.04998	0.0403662	0.067782
1124	chr18	82821523	82823039	133.625	0.597971	0.291746	2.04963	0.0404006	0.0677898
1465	chr3	37874631	37877486	38.3795	0.895372	0.437361	2.04721	0.040637	0.0681364
2093	chr8	46930395	46935714	408.497	0.461741	0.225914	2.04388	0.0409654	0.0685862
21	chr1	133033461	133034799	117.228	0.595717	0.291423	2.04416	0.0409374	0.0685862
1605	chr4	45971936	45978984	408.393	0.443308	0.217187	2.04113	0.0412378	0.0689917
865	chr15	84995052	84996226	49.5727	0.785481	0.385359	2.03831	0.0415191	0.0694114
1755	chr5	92524371	92526426	57.3541	-0.752514	0.369351	-2.0374	0.0416104	0.0695131
1369	chr2	68795726	68797152	25.9503	0.969352	0.476117	2.03595	0.0417549	0.0697035
552	chr12	83918672	83923380	1860.24	0.379855	0.186638	2.03525	0.0418262	0.0697205
861	chr15	82693025	82695420	397.531	-0.492154	0.241788	-2.03548	0.041803	0.0697205
1771	chr6	121143456	121151245	108.789	-0.60534	0.297602	-2.03406	0.0419454	0.0698682
899	chr16	20829226	20835457	148.293	0.559126	0.274944	2.0336	0.0419917	0.0698943
1732	chr5	74791709	74793296	27.8018	0.951047	0.467976	2.03225	0.042128	0.07007
1115	chr18	73834953	73836615	36.7319	0.890225	0.438925	2.02819	0.0425406	0.0707048
995	chr17	45884011	45896105	781.202	-0.416016	0.205474	-2.02466	0.042902	0.0712093
502	chr12	26067810	26069073	41.2083	0.846752	0.418253	2.0245	0.0429191	0.0712093
881	chr15	97163724	97165961	56.4528	0.769674	0.380215	2.02431	0.0429378	0.0712093
2128	chr8	94442900	94446518	129.102	0.5702	0.282062	2.02154	0.0432239	0.0716318
304	chr10	82792153	82807441	391.298	0.432443	0.214015	2.02062	0.0433192	0.0717375
393	chr11	34009724	34011265	62.298	0.726597	0.359657	2.02025	0.0433574	0.0717488
1800	chr6	145275615	145276893	30.4667	0.921933	0.456629	2.019	0.0434873	0.0719116
1831	chr6	47757462	47757894	99.7734	-0.612885	0.30362	-2.01859	0.0435299	0.07193
2059	chr8	24402679	24405012	15.9735	1.10465	0.547682	2.01696	0.0436997	0.0721583
1907	chr7	126745919	126747597	134.653	-0.557785	0.276619	-2.01643	0.0437546	0.0721967
340	chr10	98774232	98777202	69.2921	0.716953	0.355668	2.01579	0.0438219	0.0722554
952	chr16	91537343	91538951	43.5231	0.833263	0.413668	2.01433	0.0439752	0.0724179
966	chr17	10369919	10371750	28.3946	0.942238	0.467788	2.01424	0.0439839	0.0724179
1005	chr17	4906898	4911735	924.055	0.409208	0.203337	2.01246	0.0441713	0.072674
1008	chr17	50414963	50416148	29.0203	0.923154	0.459657	2.00836	0.0446054	0.0733354
1816	chr6	29512773	29514967	100.694	-0.611969	0.304769	-2.00797	0.044646	0.0733492
1770	chr6	120538988	120540766	94.4862	-0.654787	0.326777	-2.00378	0.0450939	0.0740319
226	chr10	19547643	19548910	92.0541	0.639908	0.320106	1.99905	0.0456027	0.0747964
1205	chr2	102967351	102969965	55.2269	0.739667	0.370047	1.99884	0.0456252	0.0747964
1269	chr2	167375514	167377012	74.023	0.679072	0.340256	1.99577	0.045959	0.0752896
774	chr14	69088542	69089181	25.8076	0.968761	0.485671	1.99468	0.0460773	0.0754292
1447	chr3	15126250	15127202	23.5715	0.98283	0.492837	1.99423	0.0461269	0.0754564
1835	chr6	51611915	51614078	137.853	-0.616337	0.309287	-1.99277	0.0462869	0.0756638
2201	chr9	48532407	48533127	45.4645	0.868211	0.435985	1.99138	0.0464396	0.0758591
2080	chr8	46162477	46164867	2648.79	0.370325	0.186276	1.98805	0.0468063	0.0764034
1147	chr19	21889549	21891786	49.8266	0.773712	0.38945	1.98668	0.0469581	0.0765964
2272	chrX	48053711	48055154	36.652	0.848608	0.427604	1.98457	0.0471927	0.0769241
2063	chr8	26644240	26699739	2753.2	0.358886	0.180889	1.98401	0.0472543	0.0769696
1419	chr3	121173745	121176870	81.3407	0.647623	0.32661	1.98286	0.0473831	0.0770728
1801	chr6	145301588	145327473	780.887	0.392545	0.197971	1.98284	0.0473852	0.0770728
1571	chr4	136116243	136117081	22.0514	0.99295	0.501069	1.98166	0.0475169	0.0772319
239	chr10	24534024	24535955	32.715	-0.928712	0.469112	-1.97972	0.0477347	0.0775307
1296	chr2	170317191	170320168	63.8819	0.693408	0.35073	1.97704	0.0480372	0.0779049
26	chr1	133960825	133962525	27.4467	0.957275	0.484223	1.97693	0.0480495	0.0779049
1780	chr6	125421526	125424106	84.042	0.647431	0.327519	1.97677	0.0480675	0.0779049
357	chr11	110537186	110538943	28.7253	0.929855	0.470737	1.97532	0.0482322	0.0781163
1450	chr3	18623304	18626376	247.887	0.511009	0.258777	1.9747	0.0483019	0.0781737
2016	chr8	11147817	11150480	61.1082	-0.711216	0.360236	-1.97431	0.0483469	0.078191
1232	chr2	133496548	133499548	122.902	0.560141	0.28433	1.97004	0.0488336	0.0789223
1031	chr17	83334896	83335736	49.0795	0.755673	0.383813	1.96886	0.0489694	0.0790857
593	chr13	112770373	112773138	148.894	0.555996	0.282489	1.9682	0.0490446	0.0791512
1474	chr3	52400825	52402888	54.3076	0.74425	0.378543	1.96609	0.0492884	0.0794884
902	chr16	23036192	23041129	362.825	0.500191	0.25469	1.96392	0.0495398	0.0798374
54	chr1	154008212	154010199	69.245	0.674295	0.343971	1.96032	0.0499582	0.0804549
1046	chr17	86731388	86732540	61.344	0.737472	0.376277	1.95992	0.0500057	0.0804746
1744	chr5	90412879	90416047	321.746	-0.487631	0.250103	-1.94972	0.0512092	0.0823534
53	chr1	152799792	152800428	75.4954	0.68124	0.350526	1.94348	0.0519579	0.0834985
575	chr13	104609515	104611263	81.6205	0.626189	0.322844	1.9396	0.0524278	0.0841944
1240	chr2	153591807	153594310	49.6191	-0.791321	0.408749	-1.93596	0.0528732	0.0848499
1061	chr18	34108410	34110425	48.7406	0.746901	0.385866	1.93565	0.0529111	0.0848511
574	chr13	103770346	103775445	916.435	0.368327	0.190646	1.93199	0.0533603	0.0855113
256	chr10	44008542	44011685	80.1656	-0.635579	0.329455	-1.92918	0.0537081	0.0860083
1106	chr18	61437252	61439252	54.9139	-0.721926	0.374421	-1.92812	0.0538407	0.0861602
41	chr1	138243978	138245655	48.888	0.740242	0.384362	1.9259	0.0541167	0.0865412
69	chr1	161268014	161269927	62.006	0.702545	0.36488	1.92541	0.0541776	0.086578
1966	chr7	64140881	64141520	28.6478	0.915969	0.475895	1.92473	0.0542634	0.0866543
1172	chr19	37494756	37496809	94.8302	0.626626	0.325729	1.92377	0.0543837	0.0867857
1140	chr19	21126546	21128008	65.5309	0.710914	0.370375	1.91944	0.0549281	0.0875932
856	chr15	81513655	81515780	70.7056	0.650781	0.339272	1.91817	0.0550891	0.0877758
1293	chr2	170268213	170269446	41.4513	0.792025	0.412958	1.91793	0.0551195	0.0877758
88	chr1	180777013	180781739	606.657	0.436548	0.227727	1.91698	0.0552403	0.0879068
649	chr13	51400575	51401675	47.4037	0.775996	0.404941	1.91632	0.0553242	0.0879589
807	chr15	3250255	3253003	876.274	-0.39918	0.208327	-1.91612	0.0553501	0.0879589
717	chr14	102827291	102828608	32.38	0.900826	0.470293	1.91546	0.055434	0.088031
1176	chr19	40647085	40648766	51.9905	0.722065	0.378154	1.90944	0.0562048	0.0891929
1884	chr7	101065728	101066853	27.7012	-0.892989	0.467855	-1.90869	0.0563023	0.0892855
101	chr1	184281407	184282645	31.3959	0.873574	0.457953	1.90756	0.0564477	0.0894539
1181	chr19	42509698	42510949	171.564	-0.536556	0.281346	-1.9071	0.0565071	0.0894859
854	chr15	80034151	80036240	40.9244	0.784188	0.41217	1.90258	0.0570949	0.090354
1006	chr17	4945669	4948225	214.381	-0.543846	0.287024	-1.89478	0.058122	0.0919158
487	chr12	17881264	17883101	250.786	0.500948	0.264956	1.89068	0.0586667	0.092713
148	chr1	60641106	60642039	24.4519	0.913968	0.483545	1.89014	0.0587389	0.0927627
1038	chr17	84120517	84127121	240.863	0.458686	0.242744	1.88959	0.0588125	0.0928074
879	chr15	96748850	96750826	19.8746	-0.976861	0.517043	-1.88932	0.0588485	0.0928074
568	chr12	8830179	8833127	41.1119	-0.865624	0.458805	-1.88669	0.0592017	0.0932999
1537	chr4	116658194	116660361	28.5682	0.873659	0.463312	1.88568	0.0593376	0.0934496
1204	chr2	10136675	10138685	37.2215	-0.814087	0.432546	-1.88208	0.0598252	0.0941524
406	chr11	53903304	53908562	196.261	-0.558138	0.29683	-1.88033	0.0600634	0.0944622
757	chr14	51941673	51944734	78.5364	-0.622184	0.331178	-1.8787	0.0602853	0.0947459
1230	chr2	131090146	131092517	83.6166	0.606196	0.323754	1.8724	0.0611518	0.0960415
1377	chr2	73540338	73541520	44.0324	0.745524	0.398504	1.87081	0.0613719	0.096321
505	chr12	32291994	32293198	60.0544	0.705647	0.37726	1.87046	0.0614206	0.0963312
1804	chr6	145350637	145352737	67.6965	-0.655381	0.350784	-1.86833	0.0617158	0.0967277
1365	chr2	6477598	6480023	58.896	0.675514	0.361856	1.8668	0.0619289	0.096995
238	chr10	24447236	24449290	28.8035	0.91795	0.492994	1.86199	0.0626045	0.097986
1333	chr2	30928516	30937076	176.213	0.486425	0.261424	1.86067	0.0627903	0.0982093
1528	chr4	106836953	106842048	261.279	0.448905	0.241417	1.85946	0.0629622	0.0983434
2092	chr8	46892199	46893914	118.336	0.548088	0.294721	1.85968	0.0629301	0.0983434
230	chr10	21418658	21421740	47.3986	0.753815	0.405623	1.85841	0.0631107	0.0984406
1430	chr3	122629315	122630338	34.2216	0.806519	0.433944	1.85858	0.0630867	0.0984406
1607	chr4	48027572	48046110	1287.03	0.368246	0.198859	1.85179	0.0640556	0.0998463
99	chr1	184234987	184236630	41.8412	0.751234	0.405928	1.85066	0.0642186	0.100032
1839	chr6	52085646	52087257	39.4419	0.766312	0.414175	1.85021	0.0642829	0.100064
522	chr12	54998922	54999764	67.0143	0.653874	0.354383	1.84511	0.065022	0.101145
1695	chr5	150195691	150197531	92.1782	0.573883	0.311274	1.84366	0.065233	0.101404
1422	chr3	121851400	121857284	247.578	0.464715	0.253107	1.83605	0.0663507	0.103072
429	chr11	76601593	76624681	486.792	0.375126	0.205012	1.82977	0.067284	0.10445
68	chr1	160023501	160026139	146.021	-0.502703	0.275156	-1.82698	0.0677032	0.10503
1166	chr19	36343913	36357709	376.437	-0.397232	0.217627	-1.82529	0.0679572	0.105352
2136	chr9	106265792	106268014	148.833	0.552049	0.302712	1.82368	0.0682006	0.105658
546	chr12	79993264	79995674	27.4815	0.848799	0.466692	1.81876	0.0689487	0.106744
2079	chr8	46129015	46153961	1288.86	0.333982	0.183709	1.81799	0.0690651	0.10678
234	chr10	21544540	21546991	18.5859	0.970766	0.533977	1.81799	0.0690655	0.10678
1536	chr4	116654477	116657337	65.5562	0.638362	0.351235	1.81748	0.0691436	0.106829
1654	chr5	114551760	114553266	63.2982	-0.656805	0.361698	-1.81589	0.069387	0.107132
2271	chrX	42056267	42058478	19.3349	0.951276	0.524055	1.81522	0.0694899	0.107218
218	chr10	127935297	127938112	75.5449	-0.604756	0.333479	-1.81348	0.0697585	0.10756
755	chr14	50060862	50063293	137.377	0.524086	0.289241	1.81194	0.0699959	0.107681
571	chr12	99639792	99641773	69.7549	0.616964	0.34044	1.81225	0.0699471	0.107681
2265	chrX	19161950	19167834	86.9246	0.60154	0.332022	1.81174	0.0700257	0.107681
1141	chr19	21174208	21174901	21.402	0.933082	0.514934	1.81204	0.0699794	0.107681
2065	chr8	33985519	33997355	589.567	0.437045	0.241637	1.80869	0.0704998	0.108337
623	chr13	37777187	37792112	621.685	0.362573	0.200669	1.80682	0.0707909	0.108711
1858	chr6	72533278	72535981	92.4483	0.561092	0.310915	1.80465	0.0711296	0.109158
996	chr17	46340551	46342127	59.4566	0.660866	0.36632	1.80407	0.0712204	0.109224
143	chr1	52763872	52765111	35.8397	0.789412	0.438081	1.80198	0.071549	0.109654
311	chr10	91180346	91183032	1502.76	0.345117	0.191778	1.79956	0.0719297	0.110163
936	chr16	78264424	78266099	130.481	0.551496	0.306791	1.79763	0.0722359	0.110558
400	chr11	45200360	45202247	40.2802	-0.77352	0.431029	-1.79459	0.0727193	0.111223
345	chr11	101360839	101364252	202.331	-0.453428	0.252885	-1.79302	0.0729702	0.111532
1546	chr4	128982564	128985411	98.4276	0.578597	0.323957	1.78603	0.0740945	0.113175
1948	chr7	35234210	35238006	248.234	0.42667	0.239009	1.78516	0.0742355	0.113315
1782	chr6	127324344	127331942	296.007	-0.405664	0.227604	-1.78233	0.074696	0.113941
1202	chr19	9937929	9939381	29.8397	0.816497	0.458971	1.77897	0.0752442	0.114701
330	chr10	95879921	95880979	84.217	0.589932	0.331763	1.77817	0.0753753	0.114824
2111	chr8	79614591	79617043	28.015	-0.836537	0.471122	-1.77563	0.075794	0.115385
1212	chr2	117105283	117106142	40.9422	0.733915	0.415129	1.76792	0.077074	0.117255
448	chr11	86823603	86836227	245.308	-0.464199	0.262878	-1.76584	0.0774234	0.117708
507	chr12	32744276	32770267	1042.43	-0.332088	0.188459	-1.76212	0.0780491	0.118581
686	chr13	67101126	67109754	913.034	-0.336325	0.190956	-1.76127	0.078192	0.118719
2230	chr9	78512796	78515598	54.5475	0.677509	0.384975	1.75988	0.0784289	0.118999
1965	chr7	64057786	64059053	27.5187	0.830439	0.472509	1.75751	0.078831	0.119371
2206	chr9	58801844	58805098	64.3296	0.634154	0.360783	1.75772	0.0787958	0.119371
1439	chr3	144379929	144381847	20.2878	0.903001	0.513625	1.75809	0.0787314	0.119371
1796	chr6	143146185	143147794	30.7235	0.789449	0.449795	1.75513	0.0792368	0.119906
264	chr10	51527472	51537177	567.214	0.388947	0.222166	1.7507	0.0799971	0.120976
254	chr10	41604161	41605921	85.9589	0.635455	0.363106	1.75005	0.0801094	0.121066
1484	chr3	58371689	58373546	65.8268	0.631932	0.362594	1.74281	0.081367	0.122885
1686	chr5	146817432	146820118	103.077	0.543156	0.311889	1.7415	0.0815952	0.123148
1468	chr3	51155481	51157734	48.9813	-0.697863	0.401643	-1.73752	0.0822952	0.124123
270	chr10	60256613	60257754	44.6747	0.703219	0.405564	1.73393	0.0829312	0.124999
544	chr12	79964855	79966586	39.386	0.719719	0.415525	1.73207	0.0832611	0.125248
1073	chr18	38384123	38385828	34.3254	0.760664	0.439158	1.7321	0.0832566	0.125248
417	chr11	62005149	62007504	63.2315	0.615946	0.355538	1.73244	0.0831958	0.125248
2184	chr9	40638138	40639197	42.5359	0.726734	0.420266	1.72922	0.0837691	0.12593
279	chr10	67290555	67291561	54.385	0.658611	0.381176	1.72784	0.0840169	0.126219
195	chr10	117418558	117419160	22.9123	0.850208	0.492483	1.72637	0.084281	0.126532
698	chr13	93239986	93241965	54.704	0.644665	0.373961	1.72389	0.0847285	0.127121
1148	chr19	21896048	21898806	48.194	0.691095	0.401383	1.72179	0.0851084	0.127607
918	chr16	33332247	33338503	51.9169	-0.672136	0.393914	-1.7063	0.0879518	0.131783
45	chr1	151035476	151036866	31.1481	0.795941	0.46659	1.70587	0.0880328	0.131818
1420	chr3	121269270	121277987	520.325	0.398235	0.234408	1.6989	0.0893388	0.133686
608	chr13	36682756	36684761	68.2646	-0.642967	0.378558	-1.69846	0.0894203	0.13372
152	chr1	60667844	60669253	67.5137	-0.591996	0.348638	-1.69803	0.0895028	0.133756
658	chr13	52575689	52577148	42.3663	0.688945	0.406827	1.69346	0.0903682	0.134961
293	chr10	8058889	8060605	39.3697	0.705136	0.417057	1.69074	0.0908857	0.135645
2081	chr8	46362685	46365881	56.1454	-0.623708	0.369003	-1.69025	0.09098	0.135697
1080	chr18	38778628	38780087	25.2077	-0.81995	0.485565	-1.68865	0.0912865	0.135976
277	chr10	66919282	66923346	168.027	-0.450196	0.266566	-1.68887	0.0912444	0.135976
1860	chr6	73231491	73233879	77.0139	-0.618436	0.367476	-1.68293	0.0923892	0.137529
604	chr13	34733782	34735828	42.1887	0.733289	0.43697	1.67812	0.0933235	0.138829
515	chr12	41386874	41390370	41.2188	-0.694085	0.413959	-1.6767	0.0936012	0.139152
668	chr13	58358727	58359768	34.7839	0.721046	0.43048	1.67498	0.093938	0.139562
3	chr1	105900272	105902146	34.0403	-0.761694	0.454891	-1.67445	0.0940415	0.139624
1394	chr2	93592343	93600775	315.579	0.373606	0.223323	1.67294	0.0943393	0.139975
2050	chr8	126819363	126835820	1633.17	-0.301079	0.180003	-1.67263	0.0944002	0.139975
2127	chr8	90825118	90826111	75.3683	-0.584133	0.350194	-1.66803	0.0953104	0.141233
1651	chr5	113023663	113025478	26.7181	0.789673	0.473548	1.66757	0.0954017	0.141276
1674	chr5	142362833	142369180	452.82	0.380549	0.228332	1.66665	0.0955847	0.141401
2002	chr7	97784443	97789951	152.1	0.462211	0.277351	1.66652	0.0956101	0.141401
873	chr15	88854011	88856230	33.1243	0.732764	0.439802	1.66612	0.0956894	0.141427
14	chr1	119298761	119304303	113.047	-0.489354	0.293808	-1.66556	0.0958015	0.141501
1563	chr4	133803501	133805995	87.2715	0.526255	0.316175	1.66444	0.0960241	0.141671
229	chr10	21191740	21193364	24.7921	0.817387	0.491112	1.66436	0.0960405	0.141671
1030	chr17	83322043	83324187	179.039	0.423101	0.254482	1.66259	0.0963936	0.142008
495	chr12	25202477	25205663	69.4593	0.565951	0.340395	1.66263	0.096386	0.142008
1811	chr6	17691421	17695880	513.987	0.358139	0.215777	1.65977	0.0969613	0.14266
1963	chr7	64010900	64012565	56.1317	0.623322	0.375478	1.66008	0.0968993	0.14266
1975	chr7	71222967	71224974	24.4568	0.825562	0.49795	1.65792	0.0973334	0.143115
1139	chr19	16083922	16086222	39.995	0.695563	0.420342	1.65476	0.097974	0.143964
2253	chrX	12448872	12450714	42.1387	-0.67072	0.408117	-1.64345	0.10029	0.147272
869	chr15	87073908	87075287	66.8863	0.605658	0.368629	1.643	0.100382	0.147314
1785	chr6	128753880	128756212	78.6813	0.552964	0.336772	1.64196	0.100599	0.147537
473	chr12	110706332	110707747	82.7523	0.551784	0.336266	1.64092	0.100815	0.147758
1385	chr2	84916458	84918061	33.7085	0.722002	0.440254	1.63997	0.101012	0.147952
2225	chr9	77743658	77747242	91.9233	0.527965	0.322944	1.63485	0.102081	0.149422
570	chr12	99521902	99564577	2339.58	0.290579	0.17798	1.63265	0.102542	0.15
640	chr13	44504211	44505519	28.6684	0.752768	0.462038	1.62923	0.103264	0.15096
688	chr13	74522180	74523571	813.521	0.399855	0.245743	1.62713	0.10371	0.151422
1254	chr2	164866305	164870111	125.883	0.48106	0.295652	1.62711	0.103713	0.151422
1529	chr4	108125635	108128090	126.54	-0.457133	0.281026	-1.62666	0.103809	0.151466
209	chr10	121504901	121509839	196.063	0.40922	0.252061	1.6235	0.104484	0.152255
1684	chr5	146691636	146693395	71.2851	0.590203	0.363526	1.62355	0.104471	0.152255
933	chr16	50735928	50738377	108.945	0.477628	0.294449	1.6221	0.104781	0.152591
956	chr16	94300476	94314544	1569.45	0.292385	0.181271	1.61297	0.10675	0.155359
1127	chr18	83422517	83423821	93.2829	0.531397	0.32953	1.61259	0.106833	0.155381
2147	chr9	121889582	121892064	106.512	0.481124	0.298436	1.61215	0.106929	0.155421
466	chr12	102442688	102444077	48.6555	0.628497	0.389942	1.61177	0.107012	0.155443
282	chr10	68350858	68355423	168.704	-0.441599	0.274305	-1.60988	0.107424	0.155942
1079	chr18	38770515	38772634	82.1834	-0.583677	0.362765	-1.60897	0.107623	0.156132
965	chr17	10358108	10359868	89.1588	0.527188	0.328177	1.60641	0.108183	0.156845
1864	chr6	83866664	83868485	307.249	0.366217	0.228197	1.60483	0.108532	0.157251
263	chr10	51450272	51452705	47.3056	0.63597	0.3964	1.60436	0.108634	0.157298
1672	chr5	140391973	140393783	52.2243	0.60779	0.3791	1.60325	0.10888	0.15747
1943	chr7	35085250	35087133	41.3488	-0.664346	0.414387	-1.6032	0.10889	0.15747
678	chr13	62652908	62653510	25.7136	0.763347	0.477776	1.59771	0.110108	0.159121
1649	chr5	109865938	109867131	79.0319	0.561864	0.351732	1.59742	0.110172	0.159121
727	chr14	14294022	14294957	95.6001	0.494932	0.310575	1.5936	0.111026	0.160253
1024	chr17	80785626	80787475	37.6835	-0.68388	0.429379	-1.59272	0.111223	0.160436
2069	chr8	35204258	35208442	232.985	-0.414495	0.260488	-1.59122	0.111559	0.16082
1129	chr18	84905470	84911307	242.811	-0.395885	0.249003	-1.58988	0.111862	0.161155
2057	chr8	22838465	22839358	45.9693	0.62893	0.395784	1.58908	0.112043	0.161213
2212	chr9	63057905	63059899	36.923	0.676788	0.425846	1.58928	0.111997	0.161213
1372	chr2	71661576	71663938	62.0411	0.602152	0.379068	1.5885	0.112172	0.161296
969	chr17	17234203	17235661	90.7969	0.497561	0.313723	1.58598	0.112743	0.162014
1191	chr19	5806864	5808496	92.8619	0.491011	0.310175	1.58301	0.113419	0.162884
1335	chr2	31868269	31869850	28.1543	0.733126	0.464131	1.57957	0.114206	0.163911
443	chr11	8220081	8221337	11.4111	0.930071	0.589307	1.57825	0.114509	0.164242
1636	chr4	95351198	95354745	36.8483	0.684631	0.435091	1.57354	0.115595	0.165217
185	chr1	92675277	92677179	87.0354	0.50582	0.321374	1.57393	0.115504	0.165217
84	chr1	178366167	178374637	625.99	0.333089	0.211594	1.57419	0.115443	0.165217
1889	chr7	101616435	101625903	186.772	-0.406405	0.258125	-1.57445	0.115383	0.165217
1989	chr7	79847187	79851143	238.076	-0.39924	0.253692	-1.57372	0.115552	0.165217
559	chr12	85531782	85534462	144.176	-0.42773	0.271848	-1.57341	0.115623	0.165217
2274	chrX	73467154	73469222	39.3716	0.663674	0.423088	1.56864	0.116731	0.166697
2182	chr9	35420652	35422722	77.4851	0.54696	0.349382	1.56551	0.117464	0.167638
625	chr13	38310282	38312235	27.8785	-0.743312	0.475216	-1.56416	0.117781	0.167985
278	chr10	66928047	66929634	33.9524	-0.683907	0.438554	-1.55946	0.118888	0.169356
748	chr14	34767561	34771754	300.304	-0.361966	0.232112	-1.55945	0.118891	0.169356
91	chr1	181251494	181259006	1131.2	-0.331046	0.212635	-1.55688	0.1195	0.170011
1567	chr4	134057580	134062726	143.473	0.426953	0.274203	1.55707	0.119454	0.170011
610	chr13	37450796	37453753	229.733	0.380174	0.244528	1.55473	0.120011	0.170633
954	chr16	92038164	92040344	79.6692	0.508249	0.327337	1.55268	0.1205	0.171222
948	chr16	91446092	91448138	66.9634	0.535207	0.345575	1.54874	0.121443	0.172454
1507	chr3	96496699	96498187	295.881	0.355209	0.229551	1.54741	0.121765	0.172803
1717	chr5	53956687	53958022	42.7509	-0.62288	0.40275	-1.54656	0.121968	0.172938
862	chr15	83035798	83044787	415.478	0.336223	0.217425	1.54639	0.122011	0.172938
662	chr13	54824018	54825228	26.2163	0.741885	0.480799	1.54302	0.122825	0.173983
1918	chr7	139683327	139685769	42.2829	0.637588	0.414045	1.5399	0.123585	0.174883
1906	chr7	125502864	125504480	21.2941	0.793656	0.515433	1.53978	0.123613	0.174883
320	chr10	95623991	95626303	38.838	0.700814	0.455707	1.53786	0.124083	0.175438
1135	chr19	10169549	10171261	16.2012	0.873333	0.56823	1.53694	0.124309	0.175649
194	chr10	117392485	117414932	1835.85	-0.327751	0.213346	-1.53624	0.124479	0.17578
994	chr17	45766058	45768391	53.8486	0.580631	0.378299	1.53485	0.124821	0.176155
1151	chr19	23032516	23036557	110.383	-0.465368	0.303271	-1.53449	0.124908	0.176169
884	chr15	97467666	97472045	104.378	0.47631	0.310778	1.53263	0.125366	0.176705
1487	chr3	61409215	61410465	40.7869	0.62378	0.407539	1.5306	0.125868	0.177084
781	chr14	73444703	73446456	98.655	0.484194	0.316316	1.53073	0.125837	0.177084
1152	chr19	23037868	23039449	40.812	-0.636907	0.415975	-1.53112	0.12574	0.177084
1697	chr5	151232586	151235209	67.5899	-0.560517	0.36685	-1.52792	0.126533	0.17791
569	chr12	99097055	99098216	55.2344	0.563051	0.369347	1.52445	0.127397	0.179014
281	chr10	68282355	68283585	59.2492	0.557648	0.365889	1.52409	0.127486	0.179029
1316	chr2	27495884	27497794	69.9588	0.552129	0.362567	1.52283	0.127801	0.179317
851	chr15	77854672	77859012	327.228	0.418168	0.274689	1.52233	0.127926	0.179317
2040	chr8	126496869	126499122	98.65	-0.469332	0.308249	-1.52257	0.127866	0.179317
524	chr12	58296618	58298567	32.3194	0.686265	0.451459	1.5201	0.128485	0.179989
993	chr17	43556699	43557980	52.1968	0.587574	0.387131	1.51777	0.129074	0.180703
1508	chr3	96499186	96501354	131.972	0.45499	0.299986	1.51671	0.129341	0.180912
201	chr10	118051356	118053534	82.1111	0.492756	0.32492	1.51654	0.129382	0.180912
1995	chr7	84200303	84202772	269.65	-0.375782	0.248261	-1.51366	0.130112	0.181822
2164	chr9	23035032	23036955	46.6698	0.594557	0.393391	1.51137	0.130695	0.182526
584	chr13	111933317	111934404	35.0133	0.669142	0.443832	1.50765	0.131645	0.183739
439	chr11	79771013	79772456	27.4685	-0.717091	0.476049	-1.50634	0.13198	0.184095
932	chr16	49965140	49966894	24.8145	0.737224	0.489518	1.50602	0.132062	0.184096
1012	chr17	6474882	6477538	50.4723	0.573261	0.381004	1.50461	0.132425	0.184489
1850	chr6	71487744	71488958	18.1152	0.798819	0.531085	1.50413	0.132549	0.184549
251	chr10	39266420	39267084	20.2602	0.789339	0.525238	1.50282	0.132885	0.184905
1728	chr5	64883615	64889835	127.75	0.42094	0.280792	1.49912	0.133843	0.186124
838	chr15	73067255	73069004	170.618	0.393286	0.262703	1.49707	0.134374	0.186749
821	chr15	55911882	55914657	51.1897	0.594768	0.397983	1.49445	0.135057	0.187584
147	chr1	60626543	60628500	29.655	0.685356	0.459309	1.49214	0.135661	0.188309
2062	chr8	25239949	25257298	1691.83	-0.263853	0.177061	-1.49018	0.136178	0.18891
492	chr12	21542878	21544217	197.679	0.379162	0.254549	1.48954	0.136344	0.189027
674	chr13	60486695	60489558	27.8031	-0.689963	0.465094	-1.48349	0.137944	0.191128
1592	chr4	156092902	156094410	57.2105	-0.56716	0.382404	-1.48314	0.138036	0.19114
1694	chr5	149312766	149323411	220.45	-0.359793	0.242764	-1.48207	0.138322	0.191419
1692	chr5	149238778	149243425	76.0685	0.495086	0.334253	1.48117	0.138561	0.191619
1	chr1	105114058	105117101	95.5515	-0.505094	0.341073	-1.4809	0.138634	0.191619
1984	chr7	73587408	73590187	188.694	0.375515	0.253688	1.48023	0.138812	0.191749
1701	chr5	22586626	22590619	89.1415	-0.494876	0.334782	-1.47821	0.139353	0.192379
1898	chr7	116493926	116495308	50.9485	0.586421	0.397061	1.4769	0.139702	0.192646
1606	chr4	46304247	46306182	99.2875	0.455101	0.308155	1.47685	0.139715	0.192646
1522	chr4	105327604	105329678	39.0563	-0.619601	0.419652	-1.47646	0.139819	0.192674
1726	chr5	64860880	64862660	51.7477	0.557529	0.379284	1.46995	0.141575	0.194975
1243	chr2	160151476	160152987	32.3453	0.649965	0.442659	1.46832	0.142017	0.195466
1442	chr3	149196246	149197637	22.939	0.749692	0.511861	1.46464	0.143019	0.196726
428	chr11	75975617	75977641	37.1535	0.614145	0.420824	1.45939	0.144459	0.198587
56	chr1	154097372	154099391	109.179	0.489399	0.335655	1.45804	0.144828	0.198975
96	chr1	183381416	183383397	54.2271	-0.62393	0.432301	-1.44328	0.148943	0.204505
962	chr16	97352487	97353831	61.8814	-0.543855	0.377573	-1.4404	0.149755	0.205373
1862	chr6	82029306	82031014	137.656	-0.397282	0.275783	-1.44056	0.149709	0.205373
868	chr15	8567721	8570179	55.9127	-0.533583	0.37197	-1.43448	0.151436	0.207554
1604	chr4	44223274	44235348	950.142	0.288039	0.200842	1.43416	0.151527	0.207554
206	chr10	118882363	118883770	57.9958	0.519861	0.362682	1.43338	0.15175	0.207734
537	chr12	75742646	75743896	34.9256	0.616213	0.430525	1.4313	0.152343	0.208421
611	chr13	37458666	37461601	134.239	-0.426073	0.298364	-1.42803	0.153283	0.209582
491	chr12	21495364	21496822	72.5404	-0.498889	0.350209	-1.42455	0.154289	0.210705
227	chr10	19569832	19571443	58.5662	0.540144	0.37917	1.42454	0.154289	0.210705
1608	chr4	49557116	49561449	483.058	-0.312335	0.219545	-1.42265	0.154838	0.211201
1022	chr17	80094958	80097802	232.272	0.362491	0.254748	1.42294	0.154754	0.211201
907	chr16	24198500	24201048	145.202	-0.43196	0.303822	-1.42175	0.155098	0.21143
425	chr11	72575832	72577924	48.6739	0.550982	0.387676	1.42124	0.155246	0.211505
366	chr11	19849192	19850507	27.771	-0.708858	0.499077	-1.42034	0.155509	0.211738
1142	chr19	21329434	21330439	17.58	-0.756446	0.533666	-1.41745	0.156351	0.212756
312	chr10	91187154	91188743	55.6489	0.536242	0.378928	1.41516	0.157023	0.213543
313	chr10	93068505	93081747	671.626	-0.353553	0.250056	-1.4139	0.157392	0.213918
29	chr1	134091116	134095920	493.237	0.290209	0.205362	1.41316	0.157609	0.214086
1773	chr6	122800774	122802927	112.22	0.431434	0.305449	1.41246	0.157815	0.214238
52	chr1	152796449	152797664	66.5895	0.487765	0.345675	1.41105	0.158229	0.214673
1935	chr7	27803679	27814448	402.419	0.297618	0.211179	1.40932	0.158741	0.215135
1533	chr4	10967397	10968358	51.7443	0.560685	0.397858	1.40926	0.158759	0.215135
1731	chr5	74125437	74127513	144.973	0.428885	0.304486	1.40855	0.158968	0.21529
1942	chr7	35079698	35082471	292.153	0.34531	0.245452	1.40684	0.159476	0.215851
1699	chr5	17923361	17924996	33.7036	0.609684	0.433907	1.4051	0.159991	0.216419
2249	chrX	12005064	12007600	108.341	0.422051	0.300728	1.40343	0.160489	0.216792
718	chr14	102882742	102884409	54.806	0.529021	0.377001	1.40323	0.160547	0.216792
2107	chr8	69183307	69184672	293.567	0.384186	0.273789	1.40322	0.160552	0.216792
542	chr12	7947830	7951234	175.069	-0.368275	0.262997	-1.4003	0.161423	0.21784
1346	chr2	3703666	3710924	345.098	0.378959	0.270774	1.39954	0.161651	0.218018
412	chr11	5846110	5847698	26.2465	0.673995	0.482097	1.39805	0.162098	0.218493
4	chr1	105924962	105926700	85.3207	-0.447944	0.320952	-1.39567	0.162813	0.219327
1128	chr18	84902348	84904221	76.0569	-0.480019	0.34404	-1.39524	0.162942	0.219372
140	chr1	45871637	45873125	36.6181	0.594361	0.426501	1.39358	0.163446	0.219919
2025	chr8	120334388	120337006	46.7944	0.545107	0.391396	1.39272	0.163703	0.220097
1919	chr7	140745438	140750797	146.364	-0.399519	0.286907	-1.3925	0.163771	0.220097
1122	chr18	80554363	80556389	77.9963	-0.488523	0.350946	-1.39202	0.163917	0.220164
1976	chr7	71231946	71234119	34.6955	0.640388	0.461884	1.38647	0.165604	0.222299
2138	chr9	108782991	108792036	2923.43	0.28114	0.203262	1.38314	0.166623	0.223535
561	chr12	86800562	86802947	288.52	0.352404	0.255142	1.38121	0.167216	0.224199
877	chr15	96708389	96711635	1219.82	0.27011	0.196033	1.37788	0.16824	0.22544
55	chr1	154036369	154037885	53.9445	0.516089	0.375173	1.3756	0.168944	0.22625
1304	chr2	180454979	180458310	103.198	0.414985	0.301848	1.37481	0.169189	0.226446
1285	chr2	169060461	169061423	19.8006	0.707697	0.515643	1.37246	0.169921	0.227038
2073	chr8	40651784	40661601	599.909	-0.293968	0.214106	-1.373	0.169752	0.227038
747	chr14	34660928	34663377	206.371	0.376239	0.274141	1.37243	0.16993	0.227038
1486	chr3	60407698	60410028	85.0961	0.456964	0.333316	1.37096	0.170386	0.227514
1043	chr17	84876505	84880332	310.427	-0.348586	0.254606	-1.36912	0.170963	0.22815
763	chr14	61970687	61972230	81.3945	0.442433	0.324177	1.36479	0.17232	0.229827
325	chr10	95762648	95765560	193.057	-0.367736	0.270051	-1.36173	0.173284	0.230952
1338	chr2	32506069	32508449	51.5283	0.527614	0.387533	1.36147	0.173366	0.230952
1513	chr3	98271746	98274104	31.0873	0.621439	0.457005	1.35981	0.173891	0.231516
2030	chr8	121300536	121302348	44.8522	0.543864	0.400213	1.35893	0.174167	0.231749
1863	chr6	82797490	82798842	49.7662	0.524736	0.386343	1.35821	0.174396	0.231919
1988	chr7	79254668	79260753	183.276	-0.389727	0.28731	-1.35647	0.17495	0.232384
2156	chr9	123935083	123937499	28.4511	0.625107	0.460789	1.3566	0.174908	0.232384
1775	chr6	124270626	124271952	59.3176	0.493234	0.363997	1.35505	0.175402	0.232714
691	chr13	85506397	85508356	36.9829	0.570654	0.421059	1.35528	0.175328	0.232714
2267	chrX	20424611	20426641	260.516	0.352436	0.260299	1.35397	0.175747	0.233036
424	chr11	70488936	70490640	53.1273	0.509912	0.377012	1.35251	0.176212	0.233517
738	chr14	25107864	25110633	94.7764	-0.476966	0.35302	-1.3511	0.176663	0.233779
1023	chr17	80773951	80776157	36.8179	-0.587386	0.434801	-1.35093	0.176717	0.233779
1871	chr6	88066627	88071933	97.2919	-0.422162	0.312496	-1.35094	0.176715	0.233779
1049	chr17	87520813	87523648	34.6636	0.603301	0.446854	1.35011	0.176982	0.233993
165	chr1	69759167	69760467	26.9702	0.642548	0.47843	1.34303	0.179261	0.236869
1641	chr5	103691540	103694414	241.967	0.349118	0.260239	1.34153	0.179749	0.237376
719	chr14	102906313	102908307	32.5146	0.599525	0.448402	1.33703	0.181214	0.239173
560	chr12	8640058	8641692	209.008	0.324726	0.243899	1.33139	0.183059	0.241469
1404	chr3	104359520	104360993	30.16	0.612048	0.460176	1.33003	0.183509	0.241922
1581	chr4	150214033	150221947	171.29	-0.344976	0.25946	-1.32959	0.183653	0.241972
455	chr11	94146379	94162659	5391.26	-0.234669	0.177071	-1.32528	0.185077	0.243708
1421	chr3	121649635	121651012	22.8277	-0.675829	0.510571	-1.32367	0.185611	0.244271
1274	chr2	167758503	167762790	137.836	0.367379	0.277924	1.32187	0.186212	0.24492
2077	chr8	44934656	44939101	474.084	0.29531	0.224466	1.31561	0.188305	0.24753
1544	chr4	128810927	128816111	226.193	0.318733	0.24284	1.31253	0.189343	0.248751
2047	chr8	126757375	126759281	60.0212	0.483745	0.368715	1.31198	0.189528	0.248851
1059	chr18	32146940	32148243	67.2294	0.450429	0.343788	1.31019	0.19013	0.249498
391	chr11	31769854	31771803	71.2035	-0.442659	0.339023	-1.30569	0.191658	0.251358
503	chr12	28898848	28930031	658.382	0.253762	0.195232	1.2998	0.193671	0.253852
2248	chrX	11663809	11667592	126.317	0.367564	0.284581	1.2916	0.196497	0.257409
1798	chr6	144737404	144760282	625.978	-0.25353	0.196861	-1.28787	0.197792	0.258957
1679	chr5	143817065	143818993	552.437	0.265667	0.206532	1.28632	0.19833	0.259512
305	chr10	84338425	84339679	40.9127	0.539354	0.419707	1.28507	0.198767	0.259935
294	chr10	80597436	80599276	24.3305	0.621765	0.484201	1.28411	0.199105	0.260228
2011	chr8	108691108	108693490	46.6928	0.508608	0.396755	1.28192	0.19987	0.261079
1441	chr3	149088310	149089247	34.3265	0.568055	0.443999	1.27941	0.200754	0.262082
175	chr1	7396915	7399069	77.9571	0.453904	0.354911	1.27892	0.200924	0.262155
1342	chr2	32526996	32528717	45.8388	0.537002	0.420888	1.27588	0.201998	0.263405
885	chr15	97575934	97577712	42.2738	0.527083	0.413564	1.27449	0.202491	0.263897
2113	chr8	83131313	83132460	32.3518	0.562102	0.44132	1.27368	0.202775	0.264117
410	chr11	57983404	57987723	249.936	-0.324293	0.255372	-1.26988	0.204126	0.265725
1387	chr2	85249358	85253975	171.104	-0.406077	0.32035	-1.26761	0.204938	0.26663
1991	chr7	80422069	80423756	39.267	-0.557074	0.439928	-1.26628	0.205411	0.267093
1742	chr5	9032010	9036837	428.123	-0.27011	0.21377	-1.26355	0.206391	0.268215
407	chr11	5484875	5504650	1543.41	-0.233584	0.185168	-1.26147	0.207138	0.269032
520	chr12	54397767	54399245	23.4999	0.648415	0.515532	1.25776	0.208478	0.270619
2233	chr9	90125979	90127454	104.778	-0.37553	0.298868	-1.25651	0.208932	0.271053
871	chr15	87325200	87327289	26.9214	-0.590648	0.471181	-1.25355	0.210006	0.272292
64	chr1	157012554	157014876	89.6304	0.442619	0.353613	1.2517	0.210677	0.273007
2003	chr7	98321025	98321900	32.9771	0.554676	0.444272	1.24851	0.211846	0.274366
1341	chr2	32523488	32525366	48.0509	0.509019	0.408098	1.2473	0.212289	0.274784
1909	chr7	126920368	126923332	381.2	-0.310116	0.249262	-1.24414	0.213448	0.276127
2099	chr8	4838101	4842846	277.822	0.329195	0.264732	1.2435	0.213683	0.276275
108	chr1	190047553	190055529	96.9947	-0.381214	0.306675	-1.24306	0.213847	0.27633
1213	chr2	117961989	117962932	26.6941	0.582523	0.468953	1.24218	0.214171	0.276592
51	chr1	152679563	152683470	52.9288	0.466893	0.376199	1.24108	0.214577	0.276959
595	chr13	113635736	113636738	74.9576	0.420556	0.341631	1.23102	0.218314	0.281623
122	chr1	23187446	23188656	63.6684	-0.435198	0.353624	-1.23068	0.218443	0.281631
1158	chr19	30194105	30195544	35.7657	-0.562176	0.457347	-1.22921	0.218993	0.28218
1705	chr5	32708522	32714848	1213.86	0.229989	0.187262	1.22817	0.219383	0.282365
2005	chr7	98814276	98816577	1416.22	0.229229	0.186597	1.22847	0.21927	0.282365
89	chr1	180829010	180831483	89.8532	0.430268	0.350895	1.2262	0.220123	0.283158
364	chr11	121747781	121748782	24.8465	0.588769	0.480369	1.22566	0.220326	0.283259
1196	chr19	8250974	8253755	608.89	-0.275965	0.226065	-1.22073	0.222187	0.285491
2	chr1	105177838	105179892	44.5791	-0.492812	0.404074	-1.21961	0.222613	0.285877
359	chr11	114829156	114831116	269.735	0.29353	0.241654	1.21467	0.224492	0.287788
324	chr10	95757244	95761446	112.611	-0.37194	0.306192	-1.21473	0.224469	0.287788
193	chr10	111364708	111366032	71.4913	0.413901	0.340835	1.21437	0.224606	0.287788
1083	chr18	39519022	39520518	34.5277	0.524193	0.431603	1.21453	0.224547	0.287788
2221	chr9	74519412	74529971	153.507	-0.402653	0.332976	-1.20925	0.226566	0.290136
1985	chr7	73593570	73597125	307.748	0.291573	0.241743	1.20613	0.227767	0.291348
1940	chr7	35065198	35075600	158.079	-0.322021	0.266947	-1.20631	0.227698	0.291348
1973	chr7	71064139	71066634	26.7599	0.56643	0.46993	1.20535	0.228069	0.29157
1222	chr2	124698380	124703898	289.308	0.300336	0.250387	1.19949	0.230339	0.294307
1492	chr3	69185275	69185807	13.6877	-0.685658	0.572056	-1.19858	0.230689	0.294591
2039	chr8	125725694	125727839	51.9482	0.451568	0.377375	1.1966	0.231462	0.295411
1199	chr19	9910767	9912406	28.9798	0.548745	0.458788	1.19608	0.231667	0.295508
65	chr1	157047173	157049442	29.7485	0.539933	0.453757	1.18992	0.23408	0.298419
629	chr13	41225532	41227898	90.6067	-0.409146	0.344135	-1.18891	0.234474	0.298755
1132	chr18	8934605	8936387	153.715	-0.323609	0.273006	-1.18535	0.235878	0.300376
112	chr1	191414882	191427719	467.199	0.25297	0.213672	1.18392	0.236446	0.300932
497	chr12	25223592	25226133	34.5613	-0.517677	0.437549	-1.18313	0.236757	0.30116
1824	chr6	37595505	37598419	38.8814	-0.522681	0.443163	-1.17943	0.238226	0.302858
1778	chr6	124374338	124376714	106.886	0.361757	0.307067	1.1781	0.238755	0.303362
1986	chr7	73606328	73608911	280.84	0.279623	0.237589	1.17692	0.239227	0.303793
553	chr12	85384792	85386356	32.1485	0.519059	0.441408	1.17592	0.239628	0.304133
2275	chrX	73475136	73477859	24.7325	0.567864	0.484148	1.17291	0.240831	0.30549
1461	chr3	34485623	34486565	39.2287	-0.493892	0.422042	-1.17025	0.241902	0.306508
2052	chr8	126846545	126854534	495.87	0.244117	0.208562	1.17048	0.24181	0.306508
1924	chr7	141549725	141551347	38.7959	0.48978	0.419212	1.16834	0.242671	0.307312
1019	chr17	74078112	74079843	38.0762	-0.541333	0.463933	-1.16683	0.243277	0.30763
342	chr10	99232060	99257083	5283.66	-0.231012	0.198003	-1.16671	0.243327	0.30763
1776	chr6	124272674	124274520	92.976	0.383592	0.328613	1.16731	0.243087	0.30763
2207	chr9	58805775	58806796	50.836	0.448564	0.385603	1.16328	0.244716	0.309215
2090	chr8	46882329	46884149	38.6786	-0.571164	0.491534	-1.162	0.245234	0.309697
783	chr14	75792051	75795435	196.15	0.305775	0.263345	1.16112	0.245594	0.309981
9	chr1	119218900	119220888	79.3459	0.395629	0.343216	1.15271	0.249029	0.314143
1751	chr5	91292300	91294600	49.4698	-0.439828	0.381959	-1.15151	0.249524	0.314593
1111	chr18	65241308	65243692	101.369	-0.347881	0.302948	-1.14832	0.250836	0.316072
1710	chr5	43354322	43356043	432.039	0.26331	0.229891	1.14537	0.252056	0.317425
338	chr10	97312092	97314387	205.367	0.296947	0.259331	1.14505	0.252188	0.317425
1482	chr3	57382911	57386500	163.294	-0.324617	0.284568	-1.14074	0.25398	0.319505
705	chr13	98957289	98958623	34.59	0.491375	0.431389	1.13905	0.25468	0.320123
895	chr16	19084241	19085570	22.4576	-0.565443	0.496489	-1.13888	0.254752	0.320123
1931	chr7	145292700	145293697	48.3549	0.450215	0.396227	1.13625	0.25585	0.321327
1628	chr4	8635683	8652483	2211.14	-0.20918	0.185131	-1.12991	0.258516	0.324496
485	chr12	16869811	16871532	61.4419	0.414268	0.366826	1.12933	0.258759	0.324622
57	chr1	154116541	154120494	240.373	0.301652	0.269431	1.11959	0.26289	0.329624
1703	chr5	29853804	29855300	47.0997	0.444861	0.398033	1.11765	0.263717	0.330479
1601	chr4	40876473	40877717	50.0242	0.425817	0.381482	1.11622	0.264328	0.331063
1207	chr2	110315800	110317125	26.4167	-0.529622	0.474814	-1.11543	0.264667	0.331305
1361	chr2	59437730	59439149	20.8321	0.578359	0.519312	1.1137	0.265407	0.331686
1659	chr5	115774818	115776368	37.2866	-0.520365	0.467203	-1.11379	0.26537	0.331686
1384	chr2	84510290	84530892	1327.31	0.223106	0.200233	1.11423	0.265179	0.331686
1760	chr5	96979248	96981080	42.1949	0.449773	0.404048	1.11317	0.265637	0.331792
1345	chr2	3623108	3625366	49.7358	-0.449108	0.404056	-1.1115	0.266354	0.332505
1265	chr2	166261394	166262721	24.0179	0.538225	0.485187	1.10932	0.267294	0.333496
1972	chr7	71045500	71046860	45.5913	0.446613	0.40295	1.10836	0.267707	0.333829
132	chr1	37539994	37541514	95.4564	0.352415	0.318786	1.10549	0.268947	0.335193
2067	chr8	34437969	34439825	19.9991	-0.569638	0.516262	-1.10339	0.269858	0.336145
1603	chr4	44103296	44105858	164.801	-0.292691	0.265661	-1.10175	0.270571	0.336848
1185	chr19	45675189	45676943	21.2916	-0.559767	0.508754	-1.10027	0.271214	0.337348
274	chr10	61277353	61280278	60.8906	0.407079	0.370022	1.10015	0.271268	0.337348
804	chr15	3226206	3233900	348.213	0.243079	0.221949	1.0952	0.273429	0.33985
2223	chr9	74929098	74931078	41.3748	-0.452879	0.414733	-1.09198	0.274842	0.341421
701	chr13	97299671	97301096	115.057	-0.31904	0.293073	-1.0886	0.27633	0.343082
115	chr1	191479378	191480797	27.6686	0.505259	0.464895	1.08682	0.277115	0.343869
63	chr1	156537754	156538517	41.0094	0.444347	0.409159	1.086	0.277478	0.344133
257	chr10	44528795	44531295	66.6197	0.38288	0.353008	1.08462	0.27809	0.344704
984	chr17	31745875	31748442	80.9549	0.351933	0.325628	1.08078	0.279793	0.346628
496	chr12	25207662	25210277	85.9694	0.357041	0.331466	1.07716	0.28141	0.348441
2110	chr8	72302955	72304178	66.9839	0.384367	0.357659	1.07467	0.28252	0.349627
341	chr10	99227640	99230169	183.498	0.274696	0.256726	1.07	0.284621	0.352035
298	chr10	8095251	8097422	26.6904	-0.503869	0.472868	-1.06556	0.286623	0.354319
409	chr11	57972650	57975187	53.7603	0.417162	0.39296	1.06159	0.288422	0.356157
2216	chr9	64955754	64956849	38.5275	0.446689	0.420733	1.06169	0.288376	0.356157
758	chr14	55146110	55147981	96.5823	0.325731	0.307785	1.05831	0.289916	0.357809
1417	chr3	116205119	116207430	93.8144	0.326211	0.30845	1.05758	0.290246	0.358023
1436	chr3	131018639	131020068	127.068	0.295167	0.280112	1.05375	0.291999	0.35999
1783	chr6	128200210	128201431	139.546	0.298688	0.286552	1.04235	0.297249	0.366265
2210	chr9	61812459	61813999	44.0511	0.435527	0.418324	1.04113	0.297817	0.366767
2161	chr9	21152224	21154639	35.7228	0.455412	0.438543	1.03847	0.299054	0.367807
1639	chr5	100581569	100601336	528.867	0.215034	0.207035	1.03863	0.298975	0.367807
39	chr1	137899960	137903762	94.3499	0.326055	0.314038	1.03827	0.299146	0.367807
490	chr12	21425823	21427172	253.174	-0.266603	0.258388	-1.03179	0.302171	0.371327
331	chr10	96200726	96202282	21.0464	0.517034	0.502133	1.02968	0.303162	0.372345
2217	chr9	67620959	67637682	423.009	-0.216877	0.210739	-1.02913	0.303419	0.37246
810	chr15	36726331	36728277	97.4626	-0.352994	0.34321	-1.02851	0.303711	0.372618
820	chr15	55276106	55281445	112.018	-0.330296	0.32138	-1.02774	0.304071	0.372859
167	chr1	71730796	71732461	32.1301	-0.46945	0.457422	-1.02629	0.304753	0.373494
403	chr11	51870876	51877705	167.199	-0.26996	0.263585	-1.02419	0.305747	0.374511
1165	chr19	33100114	33102945	100.482	-0.312483	0.305427	-1.0231	0.306259	0.374736
1154	chr19	23055597	23058632	560.322	0.206856	0.202169	1.02319	0.30622	0.374736
1457	chr3	27280043	27289480	208.09	0.253682	0.248211	1.02204	0.30676	0.375148
1757	chr5	93004053	93009957	322.298	-0.234398	0.229852	-1.01978	0.307834	0.37626
2266	chrX	19236583	19238693	56.8432	-0.400201	0.394213	-1.01519	0.310015	0.378723
1429	chr3	122201302	122207395	136.039	0.296552	0.292705	1.01314	0.310992	0.379713
214	chr10	126501580	126503325	23.8633	-0.490007	0.485758	-1.00875	0.313096	0.382078
129	chr1	35925533	35927084	47.1515	0.390205	0.387035	1.00819	0.313363	0.382199
1511	chr3	98258589	98264032	105.161	-0.308142	0.308536	-0.998722	0.31793	0.387562
1721	chr5	64646901	64648068	30.4051	0.460102	0.461613	0.996727	0.318897	0.388362
217	chr10	127132945	127152012	1021.88	0.226576	0.227333	0.996667	0.318926	0.388362
1640	chr5	100728101	100729618	52.7571	0.37127	0.372765	0.995989	0.319255	0.388555
950	chr16	91454260	91457271	153.484	-0.267455	0.268644	-0.995576	0.319456	0.388592
883	chr15	97457573	97459578	47.3559	0.39682	0.398748	0.995163	0.319657	0.388629
1928	chr7	145042826	145047404	212.778	-0.240652	0.242843	-0.99098	0.321695	0.390899
2043	chr8	126608794	126611605	105.786	-0.31763	0.321961	-0.986546	0.323865	0.393326
1026	chr17	81175241	81178261	84.6938	0.316963	0.321558	0.98571	0.324276	0.393615
572	chr13	102624979	102626307	22.043	-0.497674	0.505232	-0.98504	0.324605	0.393805
128	chr1	35836443	35837988	20.2349	-0.500821	0.509779	-0.982428	0.325889	0.395153
1558	chr4	133102875	133108936	328.378	-0.223514	0.227689	-0.981667	0.326264	0.395264
799	chr15	12009882	12011194	62.5907	0.350669	0.357265	0.981539	0.326327	0.395264
1530	chr4	108430731	108442050	226.427	0.234171	0.239551	0.97754	0.328302	0.397445
182	chr1	88286743	88290920	247.017	0.231325	0.237139	0.975482	0.329321	0.398468
630	chr13	41231394	41233928	471.079	-0.23215	0.238866	-0.971881	0.33111	0.400415
809	chr15	36649384	36650611	23.2545	0.47338	0.487249	0.971537	0.331281	0.400415
1625	chr4	73050475	73052520	59.361	-0.351256	0.362793	-0.968201	0.332944	0.402212
1877	chr6	91616826	91618362	32.8539	0.423537	0.443123	0.9558	0.339173	0.40952
726	chr14	120831416	120832845	37.8753	0.397332	0.416451	0.954089	0.340038	0.410348
2142	chr9	120070604	120074064	66.5614	0.330375	0.3468	0.95264	0.340773	0.411017
1313	chr2	26506360	26511439	139.777	0.276791	0.291943	0.948101	0.343078	0.413579
350	chr11	102749177	102750430	32.4399	-0.423572	0.447697	-0.946113	0.344091	0.41458
220	chr10	127965471	127967839	104.861	-0.285922	0.303966	-0.94064	0.34689	0.417732
985	chr17	31860164	31863263	67.0065	-0.343673	0.366388	-0.938004	0.348242	0.41914
1415	chr3	116161023	116163265	183.155	0.251593	0.268389	0.937417	0.348544	0.419282
397	chr11	43623810	43627392	156.214	-0.250146	0.268207	-0.932662	0.350994	0.422007
440	chr11	79787591	79790986	95.4853	-0.320622	0.345208	-0.928778	0.353004	0.4242
683	chr13	64399878	64403800	182.192	-0.24173	0.26106	-0.925957	0.354468	0.425735
1756	chr5	92999795	93002208	90.7302	-0.290479	0.314025	-0.92502	0.354956	0.426096
196	chr10	117434014	117436782	117.066	-0.271301	0.295411	-0.918383	0.358418	0.430027
1015	chr17	71177724	71180328	70.7897	0.308988	0.337407	0.915774	0.359785	0.43144
383	chr11	23047529	23048958	36.2061	0.40648	0.444083	0.915325	0.360021	0.431496
307	chr10	85189355	85191593	25.6497	-0.435282	0.47719	-0.912179	0.361675	0.43325
2131	chr9	100598709	100600276	31.0855	-0.407014	0.448934	-0.906624	0.364606	0.436532
1870	chr6	88048068	88050118	28.3331	-0.431649	0.476832	-0.905242	0.365337	0.437178
1741	chr5	89276910	89278639	82.3141	0.31768	0.35113	0.904734	0.365606	0.437271
353	chr11	104466688	104470229	352.736	0.216394	0.23981	0.902355	0.366868	0.438551
1612	chr4	53314862	53316715	24.73	0.451347	0.500437	0.901905	0.367107	0.438607
1611	chr4	53277577	53278868	31.8382	-0.40378	0.448687	-0.899915	0.368166	0.439453
1725	chr5	64780238	64782344	58.5891	0.330787	0.367603	0.899849	0.3682	0.439453
1195	chr19	61266248	61267535	2263.34	0.193854	0.215592	0.899174	0.36856	0.439652
200	chr10	117983041	117983696	12.539	0.528881	0.590554	0.895567	0.370484	0.441716
548	chr12	80273229	80274181	87.381	-0.303193	0.338792	-0.894924	0.370828	0.441895
2064	chr8	32027110	32028423	34.9186	-0.428512	0.479295	-0.894046	0.371297	0.441993
2157	chr9	124155572	124161283	139.312	0.251413	0.28113	0.894296	0.371164	0.441993
2033	chr8	123180682	123182776	46.2089	0.348229	0.39096	0.890703	0.373089	0.443451
780	chr14	73387942	73389429	20.6307	0.453874	0.509586	0.890672	0.373105	0.443451
441	chr11	79869762	79871989	68.3811	0.308019	0.345702	0.890995	0.372932	0.443451
1911	chr7	127656334	127667389	176.148	0.234578	0.264845	0.885717	0.37577	0.446386
40	chr1	138191339	138192631	34.2537	0.383509	0.433286	0.885117	0.376093	0.446537
720	chr14	103349292	103356102	155.76	0.236951	0.268868	0.881294	0.378159	0.448756
1632	chr4	94463542	94477852	264.946	0.205467	0.233305	0.880683	0.378489	0.448915
2083	chr8	46384557	46392804	349.651	-0.190867	0.217565	-0.877288	0.38033	0.450864
1041	chr17	84156130	84162392	645.587	-0.219047	0.2498	-0.876888	0.380548	0.450888
836	chr15	68358812	68364626	746.89	0.166456	0.190986	0.871558	0.38345	0.453855
514	chr12	41349672	41351245	27.9042	0.406304	0.466135	0.871643	0.383403	0.453855
2259	chrX	140504963	140507594	37.5434	-0.364454	0.421604	-0.864445	0.387343	0.458226
545	chr12	79969172	79970994	43.6126	-0.347435	0.402792	-0.862568	0.388375	0.459208
2247	chrX	11085942	11087220	41.8213	-0.350936	0.409022	-0.857988	0.390899	0.461953
1647	chr5	108453786	108456336	96.9097	-0.284128	0.331391	-0.85738	0.391235	0.462111
2263	chrX	150477495	150478910	307.46	-0.194067	0.227017	-0.854858	0.39263	0.463519
1500	chr3	84653604	84654837	17.9612	0.447902	0.524177	0.854487	0.392835	0.463521
1961	chr7	63858025	63859468	189.629	-0.21606	0.253102	-0.853649	0.3933	0.463829
831	chr15	6259682	6261803	40.0679	0.34975	0.410188	0.852658	0.393849	0.464237
844	chr15	75308595	75310685	26.5572	-0.414313	0.48808	-0.848863	0.395957	0.466241
830	chr15	62327283	62330015	55.568	-0.325761	0.383678	-0.849048	0.395855	0.466241
2084	chr8	46403203	46404971	56.5616	-0.317524	0.376493	-0.843373	0.39902	0.469604
1637	chr4	98321345	98322624	47.7417	0.332909	0.395214	0.842352	0.399591	0.470034
1299	chr2	174017837	174018765	39.548	0.354896	0.422349	0.84029	0.400746	0.47115
258	chr10	44588568	44590580	35.6811	0.356468	0.426867	0.835078	0.403674	0.474348
894	chr16	19026526	19028507	38.1358	-0.355867	0.42731	-0.832808	0.404953	0.475606
1003	chr17	48001206	48003577	168.643	-0.21758	0.262146	-0.829995	0.406541	0.477226
1849	chr6	71445592	71447336	22.516	0.421046	0.508158	0.828573	0.407346	0.477925
351	chr11	102753742	102755620	28.6386	-0.380936	0.464032	-0.820927	0.411688	0.482771
1216	chr2	119872223	119879163	419.855	0.177516	0.217601	0.815789	0.414621	0.48596
567	chr12	87397981	87400727	52.3666	0.314519	0.38666	0.813426	0.415974	0.487296
818	chr15	53398489	53400807	53.1605	0.302441	0.373054	0.810716	0.417529	0.488867
1790	chr6	141614141	141616025	54.205	-0.314128	0.388486	-0.808595	0.418748	0.490043
1113	chr18	70545207	70546503	82.6471	-0.29179	0.361057	-0.808155	0.419002	0.490088
228	chr10	19587282	19588463	24.6341	0.383956	0.478299	0.802754	0.422117	0.493479
1406	chr3	104540422	104542361	36.3933	-0.34122	0.428662	-0.796013	0.426025	0.497792
599	chr13	23717071	23718373	79.1605	0.271243	0.344115	0.788235	0.430559	0.502833
421	chr11	63860641	63863210	112.122	-0.242963	0.308453	-0.787681	0.430883	0.502954
2041	chr8	126513769	126525245	297.115	-0.207779	0.264046	-0.786907	0.431337	0.503226
1847	chr6	70813542	70815186	163.442	-0.228869	0.29365	-0.779395	0.435747	0.506416
707	chr13	99091691	99092307	11.5593	0.454174	0.582852	0.779227	0.435846	0.506416
1779	chr6	124477177	124481536	186.172	0.198411	0.25454	0.779487	0.435693	0.506416
1660	chr5	118379849	118381757	37.6732	0.331868	0.42483	0.78118	0.434697	0.506416
1678	chr5	142936292	142937198	45.7009	0.340456	0.436746	0.779528	0.435669	0.506416
1221	chr2	124689334	124691648	62.5698	0.276478	0.354657	0.779565	0.435647	0.506416
1575	chr4	141278785	141280679	100.673	0.248485	0.318749	0.779564	0.435648	0.506416
983	chr17	31038341	31040764	218.804	-0.212577	0.272693	-0.779548	0.435657	0.506416
2086	chr8	46686096	46687857	56.4122	0.285884	0.368983	0.774789	0.438464	0.508681
399	chr11	44611096	44613696	41.1293	-0.31829	0.410539	-0.775298	0.438164	0.508681
510	chr12	35019167	35022726	57.6632	0.281221	0.362936	0.77485	0.438428	0.508681
2254	chrX	12857568	12858526	82.2485	-0.250417	0.323929	-0.773062	0.439486	0.509607
1532	chr4	10964170	10965673	69.3638	0.274597	0.356507	0.770243	0.441156	0.511284
197	chr10	117865510	117868249	28.5064	0.35226	0.45798	0.76916	0.441798	0.511768
1638	chr4	99183284	99187455	333.661	-0.187186	0.244586	-0.765316	0.444083	0.514155
2137	chr9	106269445	106271808	99.4305	-0.24113	0.315294	-0.764778	0.444404	0.514264
1116	chr18	74088708	74090393	72.4956	-0.282323	0.37009	-0.762849	0.445554	0.515334
692	chr13	89377247	89385208	192.474	0.199488	0.261798	0.76199	0.446066	0.515665
2222	chr9	74920024	74924417	216.828	-0.218833	0.288118	-0.759527	0.447537	0.516842
1156	chr19	23125193	23126507	20.7118	-0.393432	0.517814	-0.759795	0.447377	0.516842
1360	chr2	59400734	59402732	101.674	0.235556	0.310524	0.758576	0.448106	0.517237
1946	chr7	35148819	35151333	64.5513	-0.266424	0.352155	-0.756554	0.449317	0.518194
377	chr11	21424421	21428796	105.622	-0.237988	0.314776	-0.756056	0.449616	0.518194
943	chr16	8768236	8770063	45.3966	0.303198	0.400975	0.75615	0.449559	0.518194
550	chr12	82085698	82086754	28.9364	-0.352644	0.468025	-0.753472	0.451166	0.519718
31	chr1	13426015	13427617	113.193	0.227054	0.3026	0.750343	0.453048	0.521623
1825	chr6	37600621	37601975	21.3103	0.379672	0.506963	0.748914	0.453909	0.52235
1934	chr7	26054226	26056627	37.8779	0.311682	0.416815	0.747771	0.454599	0.52288
753	chr14	47364685	47366192	41.7415	0.317422	0.425588	0.745843	0.455763	0.52391
2074	chr8	41149913	41151472	53.4973	0.283454	0.380207	0.745527	0.455953	0.52391
2246	chrX	10238848	10240707	41.0344	-0.306732	0.412104	-0.744308	0.45669	0.524492
587	chr13	112000079	112002571	30.915	0.344438	0.463572	0.74301	0.457476	0.52503
1813	chr6	28203306	28216242	502.635	0.15186	0.20445	0.742775	0.457618	0.52503
2229	chr9	78505453	78509596	296.625	-0.168361	0.227558	-0.739858	0.459386	0.526396
840	chr15	74885491	74893360	212.939	0.204865	0.276859	0.739961	0.459324	0.526396
1702	chr5	28030263	28057956	3655.28	0.139995	0.189268	0.739669	0.459501	0.526396
1593	chr4	19925377	19927412	52.4335	-0.293208	0.399192	-0.734504	0.462642	0.529728
1797	chr6	143749335	143752149	171.078	-0.194303	0.264691	-0.734075	0.462903	0.529762
76	chr1	170933123	170934990	54.9774	0.278949	0.380225	0.733641	0.463168	0.529799
436	chr11	79285544	79287375	121.73	-0.225078	0.308345	-0.729954	0.465418	0.532107
1945	chr7	35144684	35148013	140.585	0.217277	0.298601	0.727649	0.466828	0.533451
1954	chr7	42499905	42506354	234.195	0.179619	0.248492	0.722838	0.469779	0.536395
1518	chr4	102636844	102638424	37.1339	0.303789	0.420363	0.722683	0.469874	0.536395
[truncated: 283 more rows]
